# Supplementary material for: Efficacy and safety of pharmacologic therapies for prevention of osteoporotic vertebral fractures in postmenopausal women
Source: PubMed Central journal article supplement — Heliyon. 2022 Nov 29;9(2):e11880. doi: 10.1016/j.heliyon.2022.e11880 (PMC9958453; doi:10.1016/j.heliyon.2022.e11880), 2022-11-29

## **Supplement files**

### **1. Tables (eTable 1- eTable 9)**

**eTable 1.** Search Strategy.

**eTable 2.** Inclusion/Exclusion Criteria of Literature.

**eTable 3.** Randomized Trials Included In Systematic Reviews or Meta-Analyses Evaluating Drugs for prevention of osteoporotic vertebral fractures in postmenopausal women.

**eTable 4.** Excluded Trials and Reasons for Exclusion.

**eTable 5.** Risk of Bias Assessment.

**eTable 6.** Characteristics of the Included Trials and Participants.

**eTable 7.** Node Splitting Analyses on Vertebral Fracture.

**eTable 8.** Node Splitting Analyses on All Adverse Event.

**eTable 9.** Node Splitting Analyses on serious Adverse Event.

### **2. Figures (eFigure 1- eFigure 60)**

**eFigure 1.** Abaloparatide Compared with Placebo on Vertebral Fracture.

**eFigure 2.** Alendronate Compared with Placebo on Vertebral Fracture.

**eFigure 3.** Bazedoxifene Compared with Placebo on Vertebral Fracture.

**eFigure 4.** Calcitonin Compared with Placebo on Vertebral Fracture.

**eFigure 5.** Denosumab Compared with Placebo on Vertebral Fracture.

**eFigure 6.** Etidronate Compared with Placebo on Vertebral Fracture.

**eFigure 7.** HRT Compared with Placebo on Vertebral Fracture.

**eFigure 8.** Ibandronate Compared with Placebo on Vertebral Fracture.

**eFigure 9.** Lasofoxifene Compared with Placebo on Vertebral Fracture.

**eFigure 10.** PTH Compared with Placebo on Vertebral Fracture.

**eFigure 11.** Raloxifene Compared with Placebo on Vertebral Fracture.

**eFigure 12.** Risedronate Compared with Placebo on Vertebral Fracture.

**eFigure 13.** Romosozumab Compared with Placebo on Vertebral Fracture.

**eFigure 14.** Strontium ranelate Compared with Placebo on Vertebral Fracture.

**eFigure 15.** Teriparatide Compared with Placebo on Vertebral Fracture.

**eFigure 16.** Zoledronate Compared with Placebo on Vertebral Fracture.

**eFigure 17.** Network Plots of Comparison-based Network Meta-analyses on Vertebral Fracture in Short-term ( $\leq 18$  months) Follow-up.

**eFigure 18.** Rank Probability of Vertebral Fracture in Short-term ( $\leq 18$  months) Follow-up Based Network Meta-analysis in the Consistency Model.

**eFigure 19.** Network Plots of Comparison-based Network Meta-analyses on Vertebral Fracture in Long-term ( $> 18$  months) Follow-up.

**eFigure 20.** Rank Probability of Vertebral Fracture in Long-term ( $> 18$  months) Follow-up Based Network Meta-analysis in the Consistency Model.

**eFigure 21.** Abaloparatide Compared with Placebo on Serious Adverse Event.

**eFigure 22.** Alendronate Compared with Placebo on Serious Adverse Event.

**eFigure 23.** Bazedoxifene Compared with Placebo on Serious Adverse Event.

**eFigure 24.** Calcitonin Compared with Placebo on Serious Adverse Event.

**eFigure 25.** Denosumab Compared with Placebo on Serious Adverse Event.

**eFigure 26.** Etidronate Compared with Placebo on Serious Adverse Event.

**eFigure 27.** HRT Compared with Placebo on Serious Adverse Event.

**eFigure 28.** Ibandronate Compared with Placebo on Serious Adverse Event.

**eFigure 29.** Lasofoxifene Compared with Placebo on Serious Adverse Event.

**eFigure 30.** PTH Compared with Placebo on Serious Adverse Event.

**eFigure 31.** Raloxifene Compared with Placebo on Serious Adverse Event.

**eFigure 32.** Risedronate Compared with Placebo on Serious Adverse Event.

**eFigure 33.** Romosozumab Compared with Placebo on Serious Adverse Event.

**eFigure 34.** Strontium ranelate Compared with Placebo on Serious Adverse Event.

**eFigure 35.** Teriparatide Compared with Placebo on Serious Adverse Event.

**eFigure 36.** Zoledronate Compared with Placebo on Serious Adverse Event.

**eFigure 37.** Network Plots of Comparison-based Network Meta-analyses on All Adverse Event.

**eFigure 38.** All Adverse Event Based on Network Meta-analysis in the Inconsistency Model.

**eFigure 39.** Abaloparatide Compared with Placebo on All Adverse Event.

**eFigure 40.** Alendronate Compared with Placebo on All Adverse Event.

**eFigure 41.** Bazedoxifene Compared with Placebo on All Adverse Event.

**eFigure 42.** Calcitonin Compared with Placebo on All Adverse Event.

**eFigure 43.** Denosumab Compared with Placebo on All Adverse Event.

**eFigure 44.** HRT Compared with Placebo on All Adverse Event.

**eFigure 45.** Ibandronate Compared with Placebo on All Adverse Event.

**eFigure 46.** Lasofoxifene Compared with Placebo on All Adverse Event.

**eFigure 47.** PTH Compared with Placebo on All Adverse Event.

**eFigure 48.** Raloxifene Compared with Placebo on All Adverse Event.

**eFigure 49.** Risedronate Compared with Placebo on All Adverse Event.

**eFigure 50.** Romosozumab Compared with Placebo on All Adverse Event.

**eFigure 51.** Strontium Ranelate Compared with Placebo on All Adverse Event.

**eFigure 52.** Teriparatide Compared with Placebo on All Adverse Event.

**eFigure 53.** Zoledronate Compared with Placebo on All Adverse Event.

**eFigure 54.** Forest Plots Depicting the Direct and Indirect Results of All Adverse Event of Head-to-head Comparisons.

**eFigure 55.** Sensitivity analyses based on the frequency of administration (5 mg zoledronate once a year: vertebral fractures).

**eFigure 56.** Sensitivity analyses based on the frequency of administration (other frequency of 5 mg zoledronate: vertebral fractures).

**eFigure 57.** Sensitivity analyses based on the frequency of administration (5 mg zoledronate once a year: serious adverse event).

**eFigure 58.** Sensitivity analyses based on the frequency of administration (other frequency of 5 mg zoledronate: serious adverse event).

**eFigure 59.** Sensitivity analyses based on the frequency of administration (5 mg zoledronate once a year: all adverse event).

**eFigure 60.** Sensitivity analyses based on the frequency of administration (other frequency of 5 mg zoledronate: all adverse event).

**eTable 1.** Search strategy.

|     |                                                                                                                                                               |
|-----|---------------------------------------------------------------------------------------------------------------------------------------------------------------|
| #1  | ((zoledronic acid[MeSH Terms]) OR (zoledronate)) OR (2-(imidazol-1-yl)-1-hydroxyethylidene-1)                                                                 |
| #2  | ((Alendronate[MeSH Terms]) OR (Aminohydroxybutane Bisphosphonate)) OR (Bisphosphonate)                                                                        |
| #3  | ((Risedronic Acid[MeSH Terms]) OR (Risedronate Sodium)) OR (Risedronate)                                                                                      |
| #4  | ((Ibandronic Acid[MeSH Terms]) OR (Ibandronate)) OR (ibandronic)                                                                                              |
| #5  | (((((Teriparatide[MeSH Terms]) OR (hPTH (1-34))) OR (Human Parathyroid Hormone (1-34))) OR (hPTH)) OR (1-34)) OR (parathyroid hormone)                        |
| #6  | ((abaloparatide[MeSH Terms]) ) OR (Parathyroid Hormone-Related Protein)                                                                                       |
| #7  | ((romosozumab[MeSH Terms]) OR (AMG 785)) OR (amg 785)                                                                                                         |
| #8  | (((((Parathyroid Hormone[MeSH Terms]) OR (Parathyroid Hormone (1-84))) OR (PTH (1- 84))) OR (PTH)) OR (Parathormone)) OR (Parathyroid Hormone Peptide (1-84)) |
| #9  | ((((Denosumab[MeSH Terms]) OR (Xgeva)) OR (AMG 162)) OR (Prolia)                                                                                              |
| #10 | (((((Raloxifene[MeSH Terms]) OR (Raloxifene Hydrochloride)) OR (Keoxifene Hydrochloride)) OR (Raloxifene HCl)) OR (raloxifene hydrochloride)                  |
| #11 | (bazedoxifene[MeSH Terms]) OR (bazedoxifene acetate)                                                                                                          |
| #12 | (strontium ranelate[MeSH Terms]) OR (protelos)                                                                                                                |
| #13 | ((((Calcitonin[MeSH Terms]) OR (Calcitonin)) OR (Salmon calcitonin)) OR (Eel calcitonin)                                                                      |
| #14 | ((((Estradiol[MeSH Terms]) OR (estrogen)) OR (medroxyprogesterone)) OR (tibolone)                                                                             |
| #15 | (randomized controlled trial[Publication Type]) OR (RCT[Publication Type])                                                                                    |
| #16 | #1 OR #2 OR #3 OR #4 OR #5 OR #6 OR #7 OR #8 OR #10 OR #11 OR #12 OR #13 OR #14                                                                               |
| #17 | osteoporosis, post-menopausal[MeSH Terms]                                                                                                                     |
| #18 | #15 AND #16 AND #17                                                                                                                                           |

**eTable 2. Inclusion/exclusion criteria of literature**

| <b>PICOS</b> | <b>Inclusion</b>                                                                                                                                                                                                                                                                                                                                                                                 | <b>Exclusion</b>                                                                                                                                                                                        |
|--------------|--------------------------------------------------------------------------------------------------------------------------------------------------------------------------------------------------------------------------------------------------------------------------------------------------------------------------------------------------------------------------------------------------|---------------------------------------------------------------------------------------------------------------------------------------------------------------------------------------------------------|
| P            | Postmenopausal women with primary osteoporosis.                                                                                                                                                                                                                                                                                                                                                  | 1) Trials that also enrolled men or women who were not in menopause or with osteopenia;<br>2) Trials that also enrolled participants with low bone mineral density but without established osteoporosis |
| I            | Trials that compared one or more of the interventions of interest to each other or to placebo, and the interventions were abaloparatide, alendronate, bazedoxifene, calcitonin, denosumab etidronate, hormone replacement therapy, ibandronate, lasofoxifene, Recombinant human parathyroid hormone (1-84), raloxifene, risedronate, romosozumab, strontium ranelate, teriparatide, zoledronate. | Calcium and/or vitamin D.                                                                                                                                                                               |
| C            | Placebo or abaloparatide, alendronate, bazedoxifene, calcitonin, denosumab etidronate, hormone replacement therapy, ibandronate, lasofoxifene, Recombinant human parathyroid hormone (1-84), raloxifene, risedronate, romosozumab, strontium ranelate, teriparatide, zoledronate.                                                                                                                | Calcium and/or vitamin D.                                                                                                                                                                               |
| O            | Trials that measured at least one of the outcomes of interest, which were efficacy (new vertebral fractures) and safety (adverse events and serious adverse events).                                                                                                                                                                                                                             | Relevant outcomes were missing.                                                                                                                                                                         |
| S            | RCT irrespective of blinding or arm.                                                                                                                                                                                                                                                                                                                                                             | 1) Articles without peer-reviewed or unpublished;<br>2) Studies that were repeatedly published or had qualitative outcomes;<br>3) Quasi-experimental studies, crossover, and observational studies.     |

**eTable 3. Randomized Trials Included In Systematic Reviews or Meta-Analyses Evaluating Drugs for prevention of osteoporotic vertebral fractures in postmenopausal women.**

|                                  | 2011<br>1 | 2011<br>2 | 2011<br>3 | 2011<br>4 | 2012<br>5 | 2012<br>6 | 2012<br>7 | 2012<br>8 | 2013<br>9 | 2014<br>10 | 2015<br>11 | 2015<br>12 | 2015<br>13 | 2017<br>14 | 2017<br>15 | 2017<br>16 | 2017<br>17 | 2018<br>18 | 2020<br>19 | 2019<br>20 | 2019<br>21 | 2019<br>22 | 2019<br>23 | 2019<br>24 | 2019<br>25 | 2020<br>26 | 2020 <sup>27</sup> |   |
|----------------------------------|-----------|-----------|-----------|-----------|-----------|-----------|-----------|-----------|-----------|------------|------------|------------|------------|------------|------------|------------|------------|------------|------------|------------|------------|------------|------------|------------|------------|------------|--------------------|---|
| Hadji P 2012 <sup>28</sup>       |           |           |           |           |           |           |           |           |           |            |            |            |            |            | Y          |            |            |            | Y          |            |            | Y          |            |            |            | Y          | Y                  | Y |
| Hadji 2008 <sup>29</sup>         |           |           | Y         |           |           |           |           |           |           |            |            |            |            |            |            |            |            |            |            |            |            |            |            |            |            |            |                    |   |
| Saag 2007 <sup>30</sup>          | Y         |           |           |           |           |           |           |           |           |            |            |            |            |            |            |            |            |            |            |            |            |            |            |            |            |            |                    |   |
| Lewiecki 2009 <sup>31</sup>      |           |           | Y         | Y         |           |           |           |           |           |            |            |            |            |            |            |            |            |            |            |            |            |            |            |            |            |            |                    |   |
| Reginster 2006 <sup>32</sup>     |           |           | Y         |           |           |           |           |           |           |            |            |            |            |            |            |            |            |            |            |            |            |            |            |            |            |            |                    |   |
| Ellis 2008 <sup>33</sup>         |           |           |           | Y         |           |           |           |           |           |            | Y          |            |            |            |            |            |            |            |            |            |            |            |            |            |            |            |                    |   |
| Black 2012 <sup>34</sup>         |           |           |           |           | Y         |           |           |           | Y         |            |            |            |            |            |            |            |            |            |            |            |            |            |            |            |            |            |                    |   |
| Boonen 2011 <sup>35</sup>        |           |           |           |           | Y         |           |           |           |           |            |            |            |            |            |            |            |            |            |            |            |            |            |            |            |            |            |                    |   |
| Sambrook 2012 <sup>36</sup>      |           |           |           |           | Y         |           |           |           |           |            |            |            |            |            |            |            |            |            |            |            |            |            |            |            |            |            |                    |   |
| Boonen 2010 <sup>37</sup>        |           |           |           |           | Y         |           |           |           |           |            |            |            |            | Y          |            |            |            |            |            |            |            |            |            |            |            |            |                    |   |
| Hwang 2011 <sup>38</sup>         |           |           |           |           | Y         |           |           |           |           |            |            |            |            | Y          |            |            | Y          |            |            |            |            |            |            |            |            |            |                    |   |
| Bubbear 2011 <sup>39</sup>       |           |           |           |           | Y         |           |           |           |           |            |            |            |            |            |            |            |            |            |            |            |            |            |            |            |            |            |                    |   |
| Saag 2007 <sup>40</sup>          |           |           |           |           | Y         |           |           |           |           |            |            |            |            |            |            |            |            |            |            |            |            |            |            |            |            |            |                    |   |
| Chesnut 1995 <sup>41</sup>       |           |           |           |           |           |           |           |           | Y         |            |            |            |            |            |            |            |            |            |            |            |            |            |            |            |            |            |                    |   |
| Kanis 1996 <sup>42</sup>         |           |           |           |           |           |           |           |           | Y         |            |            |            |            |            |            |            |            |            |            |            |            |            |            |            |            |            |                    |   |
| Shiraki 1998 <sup>43</sup>       |           |           |           |           |           |           |           |           | Y         |            |            |            |            |            |            |            |            |            |            |            |            |            |            |            |            |            |                    |   |
| McClung 1998 <sup>44</sup>       |           |           |           |           |           |           |           |           | Y         |            |            |            |            |            |            |            |            |            |            |            |            |            |            |            |            |            |                    |   |
| Greenspan 1998 <sup>45</sup>     |           |           |           |           |           |           |           |           | Y         |            |            |            |            |            |            |            |            |            |            |            |            |            |            |            |            |            |                    |   |
| Lau 2000 <sup>46</sup>           |           |           |           |           |           |           |           |           | Y         |            |            |            |            |            |            |            | Y          |            |            |            |            |            |            |            |            |            |                    |   |
| Bell 2002 <sup>47</sup>          |           |           |           |           |           |           |           |           | Y         |            |            |            |            |            |            |            |            |            |            |            |            |            |            |            |            |            |                    |   |
| Chailurkit 2003 <sup>48</sup>    |           |           |           |           |           |           |           |           | Y         |            |            |            |            |            |            |            |            |            |            |            |            |            |            |            |            |            |                    |   |
| Lyles 2007 <sup>49</sup>         |           |           |           |           |           |           |           |           | Y         |            |            |            |            |            |            |            |            |            |            |            |            |            |            |            |            |            |                    |   |
| Bekker 2004 <sup>50</sup>        |           |           |           |           |           |           |           |           |           |            | Y          |            |            |            |            |            |            |            |            |            |            |            |            |            |            |            |                    |   |
| Kumagai 2011 <sup>51</sup>       |           |           |           |           |           |           |           |           |           |            | Y          |            |            |            |            |            |            |            |            |            |            |            |            |            |            |            |                    |   |
| Smith 2009 <sup>52</sup>         |           |           |           |           |           |           |           |           |           |            | Y          |            |            |            |            |            |            |            |            |            |            |            |            |            |            |            |                    |   |
| Orwoll 2012 <sup>53</sup>        |           |           |           |           |           |           |           |           |           |            | Y          |            |            |            |            |            |            |            |            |            |            |            |            |            |            |            |                    |   |
| Brown 2009 <sup>54</sup>         |           |           |           |           |           |           |           |           |           |            | Y          |            |            |            |            |            |            |            |            | Y          |            |            |            |            |            |            |                    |   |
| Beck 2008 <sup>55</sup>          |           |           |           |           |           |           |           |           |           |            | Y          |            |            |            |            |            |            |            |            |            |            |            |            |            |            |            |                    |   |
| Zebaze 2014 <sup>56</sup>        |           |           |           |           |           |           |           |           |           |            | Y          |            |            |            |            |            |            |            |            |            |            |            |            |            |            |            |                    |   |
| Roux 2014 <sup>57</sup>          |           |           |           |           |           |           |           |           |           |            | Y          |            |            |            |            |            |            |            |            | Y          |            |            |            |            |            |            |                    |   |
| Brown 2014 <sup>58</sup>         |           |           |           |           |           |           |           |           |           |            | Y          |            |            |            |            |            |            |            |            |            |            |            |            |            |            |            |                    |   |
| Anastasilakis 2013 <sup>59</sup> |           |           |           |           |           |           |           |           |           |            | Y          |            |            |            |            |            |            |            |            |            |            |            |            |            |            |            |                    |   |
| Seeman 2010 <sup>60</sup>        |           |           |           |           |           |           |           |           |           |            | Y          |            |            |            |            |            |            |            |            |            |            |            |            |            |            |            |                    |   |
| Chesnut 2004 <sup>61</sup>       |           |           |           |           |           |           |           |           |           |            |            | Y          |            |            |            |            |            |            |            |            |            |            |            |            | Y          | Y          |                    |   |













**eTable 4. Excluded Trials and Reasons for Exclusion**

|    |                      |                                                                    |
|----|----------------------|--------------------------------------------------------------------|
| 1  | Saag 2007            | The participants had osteoporosis caused by glucocorticoid.        |
| 2  | Hadji 2008           | This was a crossover study.                                        |
| 3  | Reginster 2006       | Intervention and control are the same drug.                        |
| 4  | Ellis 2008           | Women with nonmetastatic breast cancer under aromatase inhibitors. |
| 5  | Black 2012           | Patients included men.                                             |
| 6  | Boonen 2011          | Patients included men.                                             |
| 7  | Sambrook 2012        | Patients included osteoporosis caused by glucocorticoid.           |
| 8  | Bubbear 2011         | Patients included men.                                             |
| 9  | Saag 2007            | Patients included men.                                             |
| 10 | Chesnut 1995         | Postmenopausal women with osteopenia.                              |
| 11 | Kanis 1996           | This study did not reported vertebral fractures and adverse data.  |
| 12 | Shiraki 1998         | Patients were with osteopenia and osteoporosis.                    |
| 13 | McClung 1998         | Patients were with osteopenia.                                     |
| 14 | Greenspan 1998       | Entry criteria were not based on BMD.                              |
| 15 | Lau 2000             | This study did not reported vertebral fractures and adverse data.  |
| 16 | Lyles 2007           | Patients included men.                                             |
| 17 | Bekker 2004          | This study did not reported vertebral fractures and adverse data.  |
| 18 | Kumagai 2011         | This study did not reported vertebral fractures and adverse data.  |
| 19 | Smith 2009           | Patients included men men under anti-androgen for prostate cancer. |
| 20 | Orwoll 2012          | Patients included men.                                             |
| 21 | Beck 2008            | Menopausal women with low BMD.                                     |
| 22 | Zebaze 2014          | Patients were with osteopenia.                                     |
| 23 | Brown 2014           | This was a post-hoc analysis                                       |
| 24 | Emkey 2005           | This was a crossover study.                                        |
| 25 | Anastasilakis 2013   | This study did not reported vertebral fractures and adverse data.  |
| 26 | Miyauchi 2010        | Patients included men.                                             |
| 27 | Glüer CC 2013        | Men with glucocorticoid-induced osteoporosis .                     |
| 28 | Simon 2013           | This study did not reported vertebral fractures and adverse data.  |
| 29 | Nakamura 2014        | Patients included men.                                             |
| 30 | Malouf-Sierra J 2016 | Patients included men.                                             |
| 31 | Walker MD 2012       | Patients were men with low bone mineral density.                   |
| 32 | Aspenberg P 2016     | Patients included men.                                             |
| 33 | Body 2002            | This study did not reported vertebral fractures and adverse data.  |
| 34 | Arlot 2005           | This study did not reported vertebral fractures and adverse data.  |
| 35 | Keaveny 2007         | This study did not reported vertebral fractures and adverse data.  |
| 36 | Panico 2011          | Patients with previous treatment without restrictions.             |
| 37 | Greenspan 2002       | This study did not reported vertebral fractures and adverse data.  |
| 38 | Eastell 2009         | The intervention was a combination therapy.                        |
| 39 | Black 2003           | This study did not reported vertebral fractures and adverse data.  |
| 40 | Sethi 2008           | This study did not reported vertebral fractures and adverse data.  |
| 41 | Cosman 2010          | This study did not reported vertebral fractures and adverse data.  |

|    |                    |                                                                   |
|----|--------------------|-------------------------------------------------------------------|
| 42 | Cosman 2001        | The intervention was a combination therapy.                       |
| 43 | Ste-Marie 2006     | The intervention was a combination therapy.                       |
| 44 | Cosman 2005        | The intervention was a combination therapy.                       |
| 45 | Tsai 2013          | The intervention was a combination therapy.                       |
| 46 | Alexandersen 1999  | Fractures reported as AEs but confirmed by radiography.           |
| 47 | Blair 2009         | The full text cannot be obtained.                                 |
| 48 | Bush 1996          | This study did not reported vertebral fractures and adverse data. |
| 49 | Dursun 2001        | Patients were with osteopenia and osteoporosis.                   |
| 50 | Cosman 2009        | This study did not reported vertebral fractures and adverse data. |
| 51 | Gallagher 2001     | Patients were with normal BMD.                                    |
| 52 | Gennari, 1985      | The full text cannot be obtained.                                 |
| 53 | Greenspan 1998     | This study did not reported vertebral fractures and adverse data. |
| 54 | Grey 2009          | Patients were with osteopenia.                                    |
| 55 | Grey 2014          | Patients were with osteopenia.                                    |
| 56 | Gruber 1984        | This study did not reported vertebral fractures and adverse data. |
| 57 | Hizmetli 1998      | The full text cannot be obtained.                                 |
| 58 | Hulley 1998        | It was not clarified whether the patient had osteoporosis.        |
| 59 | Iwamoto 2008       | This was a retracted article.                                     |
| 60 | Jacobsen 2012      | It was not clarified whether the patient had osteoporosis.        |
| 61 | Komulainen 1998    | This study did not reported vertebral fractures and adverse data. |
| 62 | Lees 2001          | Patients were with normal BMD.                                    |
| 63 | Lindsay 1990       | The full text cannot be obtained.                                 |
| 64 | McClung 2004       | Patients were with normal BMD, osteopenia and osteoporosis.       |
| 65 | Mortensen 1998     | Patients were with normal BMD.                                    |
| 66 | Mosekilde 2000     | Patients were with normal BMD.                                    |
| 67 | Muscoso 2004       | This study did not reported vertebral fractures and adverse data. |
| 68 | Nachtigall 1979    | It was not clarified whether the patient had osteoporosis.        |
| 69 | Nakamura 2014      | Patients included men.                                            |
| 70 | Recker 1999        | Patients were with osteopenia and osteoporosis.                   |
| 71 | Reid 2002          | Patients were with osteopenia and osteoporosis.                   |
| 72 | Reid 2004          | Patients were with normal BMD or osteopenia.                      |
| 73 | Rogers 2009        | Patients were with osteopenia.                                    |
| 74 | Tanko 2004         | Patients were with normal BMD.                                    |
| 75 | Tierney 2009       | It was not clarified whether the patient had osteoporosis.        |
| 76 | Ushiroyama 2001    | Patients were with osteopenia and osteoporosis.                   |
| 77 | Vickers 2007       | It was not clarified whether the patient had osteoporosis.        |
| 78 | Weiss 1999         | It was not clarified whether the patient had osteoporosis.        |
| 79 | Yan 2009           | Fractures reported as AEs but confirmed by radiography.           |
| 80 | Yang 2015          | This study did not reported vertebral fractures and adverse data. |
| 81 | Abboskhujueva 2014 | The intervention was a combination therapy.                       |
| 82 | Ilter 2006         | The two interventions were the same drug.                         |
| 83 | Epstein 2006       | This was a review.                                                |
| 84 | Stepan 1999        | This study did not reported vertebral fractures and adverse data. |

|    |                    |                                                                          |
|----|--------------------|--------------------------------------------------------------------------|
| 85 | Eastell 2014       | Patients were with osteopenia and osteoporosis.                          |
| 86 | Anastasilakis 2015 | Postmenopausal women previously treated with zoledronic acid for 1 year. |
| 87 | Kendler 2011       | This was a crossover study.                                              |
| 88 | Niimi 2018         | Patients previously treated with teriparatide for 2 year.                |

**eTable 5.** Risk of Bias Assessment.

| First author, year                | Number | Study design | Baseline imbalance | Allocation concealment | Blinding |     |     |     |     | Funding                                           | Fracture assessment                                                                                                             | Overall RoB | Follow up (months) |
|-----------------------------------|--------|--------------|--------------------|------------------------|----------|-----|-----|-----|-----|---------------------------------------------------|---------------------------------------------------------------------------------------------------------------------------------|-------------|--------------------|
|                                   |        |              |                    |                        | CG       | OA  | DC  | DA  | P   |                                                   |                                                                                                                                 |             |                    |
| Saag 2017 <sup>223</sup>          | 1      | Both         | No                 | Probably Yes           | Yes      | NR  | NR  | NR  | Yes | Includes for-profit source                        | Documented by medical personnel                                                                                                 | Low         | 12                 |
| Cosman 2016 <sup>76</sup>         | 2      | Both         | No                 | Probably Yes           | Yes      | No  | NR  | NR  | Yes | Includes for-profit source                        | Documented by medical personnel                                                                                                 | Low         | 12                 |
| Ishibashi 2017 <sup>152</sup>     | 3      | RCT          | No                 | Yes                    | Yes      | Yes | Yes | Yes | Yes | Includes for-profit source                        | Documented by medical personnel                                                                                                 | Low         | 12                 |
| Cosman 2017 <sup>78</sup>         | 4      | Open-label   | No                 | Probably Yes           | NR       | NR  | NR  | NR  | Yes | Includes for-profit source                        | Medical records or radiologic reports                                                                                           | High        | 18                 |
| Miller 2016a <sup>224</sup>       | 5      | Double-blind | No                 | Probably Yes           | No       | Yes | Yes | NR  | No  | Includes for-profit source                        | Documented by medical personnel                                                                                                 | High        | 18                 |
| Langdahl 2017 <sup>225</sup>      | 6      | Open-label   | No                 | Probably No            | No       | No  | No  | Yes | No  | Includes for-profit source                        | Documented by medical personnel                                                                                                 | High        | 12                 |
| Kendler 2018 <sup>226</sup>       | 7      | Double-blind | No                 | Yes                    | Yes      | Yes | Yes | Yes | Yes | Includes for-profit source                        | Medical records or radiologic reports                                                                                           | Low         | 24                 |
| Cummings 2010 <sup>88</sup>       | 8      | Double-blind | No                 | Probably No            | NR       | NR  | NR  | NR  | NR  | Not reported or unclear                           | Vertebral fractures by medical personnel, non-vertebral by self-report                                                          | High        | 60                 |
| Meunier 2004 <sup>227</sup>       | 9      | Double-blind | No                 | Probably No            | Yes      | NR  | NR  | NR  | Yes | Only not or-profit source/Not reported or unclear | Documented by medical personnel/ Vertebral fractures by radiographs. Non vertebral fractures by radiographs and medical reports | High        | 36                 |
| Reginster 2008 <sup>228</sup>     | 10     | Double-blind | No                 | NR or unclear          | Yes      | NR  | NR  | NR  | Yes | Not reported or unclear                           | Vertebral fractures by medical personnel, non-vertebral not specified                                                           | High        | 60                 |
| Hadji 2012 <sup>229</sup>         | 11     | Double-blind | No                 | NR or unclear          | Yes      | NR  | NR  | NR  | Yes | Includes for-profit source.                       | Documented by medical personnel                                                                                                 | High        | 18                 |
| Reginster 2000 <sup>230</sup>     | 12     | Double-blind | No                 | NR or unclear          | Yes      | NR  | NR  | NR  | Yes | Includes for-profit source                        | Vertebral fractures by medical personnel, non-vertebral not specified                                                           | High        | 36                 |
| Fogelman 2000 <sup>231</sup>      | 13     | Double-blind | No                 | NR or unclear          | Yes      | NR  | NR  | NR  | Yes | Includes for-profit source                        | Documented by medical personnel                                                                                                 | High        | 24                 |
| Anastasilakis 2008 <sup>232</sup> | 14     | Open-label   | No                 | Probably No            | NR       | NR  | NR  | NR  | NR  | Not reported or unclear                           | NR                                                                                                                              | High        | 12                 |
| Cosman 2011 <sup>233</sup>        | 15     | Double-blind | No                 | Probably Yes           | Yes      | NR  | NR  | NR  | Yes | Includes for-profit source                        | Documented by medical personnel                                                                                                 | Low         | 12                 |
| Neer 2001 <sup>234</sup>          | 16     | RCT          | No                 | NR or unclear          | NR       | NR  | NR  | Yes | NR  | Includes for-profit source                        | Documented by medical personnel                                                                                                 | High        | 21                 |
| McClung 2005 <sup>97</sup>        | 17     | Double-blind | No                 | NR or unclear          | Yes      | NR  | NR  | NR  | Yes | Includes for-profit source                        | Documented by medical personnel                                                                                                 | High        | 18                 |

|                               |    |              |    |               |     |     |     |     |     |                                                    |                                                                        |         |    |
|-------------------------------|----|--------------|----|---------------|-----|-----|-----|-----|-----|----------------------------------------------------|------------------------------------------------------------------------|---------|----|
| Lieberman 1995 <sup>80</sup>  | 18 | Double-blind | No | NR or unclear | Yes | Yes | NR  | NR  | Yes | Includes for-profit source                         | Vertebral fractures by medical personnel, non-vertebral not specified  | High    | 36 |
| Black 2006 <sup>235</sup>     | 19 | Double-blind | No | Yes           | Yes | Yes | Yes | No  | Yes | Includes for-profit source                         | Medical records or radiologic reports                                  | Low     | 60 |
| Black 1996 <sup>104</sup>     | 20 | Double-blind | No | Probably Yes  | Yes | NR  | NR  | NR  | Yes | Not reported or unclear                            | Medical records or radiologic reports                                  | Low     | 36 |
| Cummings 1998 <sup>105</sup>  | 21 | Double-blind | No | Probably Yes  | Yes | Yes | Yes | Yes | Yes | Includes for-profit source                         | Documented by medical personnel                                        | Low     | 48 |
| McClung 2006a <sup>236</sup>  | 22 | Both         | No | Probably Yes  | Yes | NR  | NR  | NR  | Yes | Includes for-profit source                         | NR                                                                     | Low     | 12 |
| Harris 1999 <sup>237</sup>    | 23 | Double-blind | No | Probably Yes  | Yes | NR  | NR  | NR  | Yes | Includes for-profit source                         | Documented by medical personnel                                        | Low     | 36 |
| McClung 2001 <sup>83</sup>    | 24 | RCT          | No | NR or unclear | NR  | NR  | NR  | NR  | NR  | Includes for-profit source                         | Documented by medical personnel                                        | High    | 36 |
| Black 2007 <sup>238</sup>     | 25 | Double-blind | No | Probably Yes  | Yes | NR  | NR  | NR  | Yes | Includes for-profit source                         | Documented by medical personnel                                        | Low     | 36 |
| Reid 2018 <sup>106</sup>      | 26 | Double-blind | No | Yes           | Yes | Yes | Yes | Yes | Yes | Includes for-profit source                         | Medical records or radiologic reports                                  | Low     | 72 |
| Bone 2008 <sup>107</sup>      | 27 | Double-blind | No | NR or unclear | Yes | NR  | NR  | NR  | Yes | Includes for-profit source                         | Documented by medical personnel                                        | High    | 24 |
| Bone 2018 <sup>79</sup>       | 28 | Open-label   | No | Probably No   | NR  | NR  | NR  | NR  | NR  | Includes for-profit source                         | Documented by medical personnel                                        | High    | 24 |
| Cummings 2009 <sup>85</sup>   | 29 | Double-blind | No | NR or unclear | NR  | NR  | NR  | NR  | NR  | Includes for-profit source                         | Medical records or radiologic reports                                  | High    | 36 |
| Miller 2016b <sup>110</sup>   | 30 | Double-blind | No | NR or unclear | Yes | Yes | Yes | Yes | Yes | Includes for-profit source                         | Documented by medical personnel                                        | Unclear | 12 |
| Brown 2009 <sup>239</sup>     | 31 | Double-blind | No | NR or unclear | Yes | Yes | Yes | Yes | Yes | Only not for-profit source                         | Documented by medical personnel                                        | High    | 12 |
| Roux 2014 <sup>57</sup>       | 32 | Open-label   | No | NR or unclear | NR  | NR  | NR  | NR  | NR  | Includes for-profit source                         | Documented by medical personnel                                        | Unclear | 12 |
| Greenspan 2015 <sup>240</sup> | 33 | Double-blind | No | NR or unclear | Yes | Yes | Yes | Yes | Yes | Only not for-profit source                         | Documented by medical personnel                                        | High    | 24 |
| McClung 2009b <sup>138</sup>  | 34 | Double-blind | No | NR or unclear | NR  | NR  | NR  | NR  | NR  | Only not for-profit source/Not reported or unclear | Medical records or radiologic reports                                  | Unclear | 24 |
| Boonen 2010 <sup>241</sup>    | 35 | Double-blind | No | Probably Yes  | NR  | NR  | NR  | NR  | NR  | Includes for-profit source                         | Medical records or radiologic reports                                  | Unclear | 36 |
| Hwang 2011 <sup>242</sup>     | 36 | Double-blind | No | NR or unclear | NR  | NR  | NR  | NR  | NR  | Includes for-profit source                         | Documented by medical personnel                                        | Unclear | 36 |
| Recknor 2013 <sup>243</sup>   | 37 | Open-label   | No | Probably Yes  | NR  | NR  | NR  | NR  | NR  | Includes for-profit source                         | NR                                                                     | Unclear | 12 |
| Miller 2008a <sup>244</sup>   | 38 | Double-blind | No | Probably Yes  | Yes | Yes | Yes | NR  | Yes | Includes for-profit source                         | NR                                                                     | Low     | 12 |
| McClung 2009a <sup>114</sup>  | 39 | Double-blind | No | NR or unclear | Yes | NR  | NR  | NR  | Yes | Includes for-profit source                         | Vertebral fractures by medical personnel, non-vertebral by self-report | High    | 12 |



|                                 |    |              |    |               |     |     |     |     |     |                             |                                                                        |         |       |
|---------------------------------|----|--------------|----|---------------|-----|-----|-----|-----|-----|-----------------------------|------------------------------------------------------------------------|---------|-------|
| Bock 2012 <sup>245</sup>        | 40 | Double-blind | No | Probably Yes  | Yes | NR  | NR  | NR  | Yes | Only not for-profit source. | Documented by medical personnel                                        | Low     | 12    |
| Cooper 2006 <sup>208</sup>      | 41 | Open-label   | No | Probably Yes  | NR  | NR  | NR  | NR  | NR  | Includes for-profit source  | NR                                                                     | Unclear | 6     |
| Greenspan 2007 <sup>73</sup>    | 42 | Double-blind | No | Probably Yes  | Yes | Yes | NR  | NR  | NR  | Includes for-profit source  | Documented by medical personnel                                        | Unclear | 18    |
| Fogelman 2008 <sup>246</sup>    | 43 | Double-blind | No | NR or unclear | Yes | NR  | NR  | NR  | Yes | Includes for-profit source  | Vertebral fractures by medical personnel, non-vertebral by self-report | High    | 24    |
| Ensrud 2008 <sup>119</sup>      | 44 | Double-blind | No | Probably Yes  | Yes | Yes | Yes | Yes | Yes | Includes for-profit source  | Documented by medical personnel                                        | Low     | 5.6yr |
| Ettinger 1999 <sup>89</sup>     | 45 | Double-blind | No | Probably Yes  | Yes | Yes | NR  | NR  | Yes | Includes for-profit source  | Vertebral fractures by medical personnel, non-vertebral not specified  | Low     | 36    |
| Sambrook 2004 <sup>247</sup>    | 46 | Double-blind | No | Yse           | Yes | Yes | Yes | NR  | Yes | Includes for-profit source  | NR                                                                     | Low     | 12    |
| Bone 1997 <sup>137</sup>        | 47 | Double-blind | No | NR or unclear | Yes | NR  | NR  | NR  | Yes | Includes for-profit source  | Documented by medical personnel                                        | High    | 24    |
| Recker 2007 <sup>122</sup>      | 48 | Double-blind | No | Probably Yes  | Yes | NR  | NR  | NR  | Yes | Includes for-profit source  | Documented by medical personnel                                        | Low     | 5yr   |
| Lufkin 1998 <sup>248</sup>      | 49 | Double-blind | No | Probably Yes  | Yes | NR  | NR  | NR  | Yes | Includes for-profit source  | Vertebral fractures by medical personnel, non-vertebral not specified  | Low     | 12    |
| Luckey 2004 <sup>249</sup>      | 50 | Double-blind | No | Probably Yes  | Yes | NR  | NR  | NR  | Yes | Includes for-profit source  | NR                                                                     | Low     | 12    |
| Kendler 2010a <sup>250</sup>    | 51 | Double-blind | No | Probably Yes  | Yes | Yes | Yes | NR  | Yes | Includes for-profit source  | Documented by medical personnel                                        | Low     | 12    |
| Tucci 1996 <sup>251</sup>       | 52 | Double-blind | No | Probably Yes  | NR  | NR  | NR  | NR  | Yes | NR                          | Medical records or radiologic reports                                  | Unclear | 36    |
| Silverman 2008 <sup>252</sup>   | 53 | Double-blind | No | Probably Yes  | Yes | Yes | NR  | Yes | Yes | Includes for-profit source  | Documented by medical personnel                                        | Low     | 36    |
| Pols 1999 <sup>135</sup>        | 54 | Double-blind | No | NR or unclear | Yes | NR  | NR  | NR  | Yes | Includes for-profit source  | Documented by medical personnel                                        | High    | 12    |
| Bell 2002 <sup>253</sup>        | 55 | Double-blind | No | Probably Yes  | Yes | NR  | NR  | NR  | NR  | NR                          | Medical records or radiologic reports                                  | Unclear | 24    |
| Chailurkit 2003 <sup>254</sup>  | 56 | NR           | No | Probably Yes  | Yes | NR  | NR  | NR  | Yes | Includes for-profit source  | NR                                                                     | Unclear | 12    |
| Rosen 2005 <sup>255</sup>       | 57 | Double-blind | No | Probably Yes  | Yes | Yes | Yes | NR  | Yes | Includes for-profit source  | Documented by medical personnel                                        | Unclear | 12    |
| Seeman 2010 <sup>256</sup>      | 58 | Double-blind | No | Probably Yes  | Yes | NR  | NR  | NR  | Yes | Includes for-profit source  | Documented by medical personnel                                        | Low     | 12    |
| Finkelstein 2010 <sup>257</sup> | 59 | RCT          | No | Probably Yes  | NR  | NR  | NR  | NR  | NR  | Includes for-profit source  | Documented by medical personnel                                        | Unclear | 6     |
| Kung 2000 <sup>258</sup>        | 60 | Double-blind | No | Probably Yes  | NR  | NR  | NR  | NR  | NR  | Includes for-profit source  | Documented by medical personnel                                        | Unclear | 12    |
| Meunier 2002 <sup>259</sup>     | 61 | Double-blind | No | Probably Yes  | NR  | NR  | NR  | NR  | NR  | Includes for-profit source  | Documented by medical personnel                                        | Unclear | 24    |

|                               |    |              |     |               |     |     |     |    |     |                                                    |                                                                                                                                |         |    |
|-------------------------------|----|--------------|-----|---------------|-----|-----|-----|----|-----|----------------------------------------------------|--------------------------------------------------------------------------------------------------------------------------------|---------|----|
| Roux 2008 <sup>91</sup>       | 62 | Double-blind | No  | Probably Yes  | NR  | NR  | NR  | NR | NR  | NR                                                 | Medical records or radiologic reports                                                                                          | Unclear | 48 |
| McClung 2006b <sup>139</sup>  | 63 | Double-blind | No  | Probably Yes  | NR  | NR  | NR  | NR | NR  | Includes for-profit source                         | Documented by medical personnel                                                                                                | Unclear | 24 |
| Meunier 2009 <sup>260</sup>   | 64 | Double-blind | No  | Probably No   | Yes | NR  | NR  | NR | Yes | Only not for-profit source/Not reported or unclear | Documented by medical personnel/Vertebral fractures by radiographs. Non-vertebral fractures by radiographs and medical reports | High    | 48 |
| Hwang 2008 <sup>212</sup>     | 65 | Double-blind | No  | Probably No   | NR  | NR  | NR  | NR | NR  | Includes for-profit source                         | Medical records or radiologic reports                                                                                          | Unclear | 12 |
| Miller 2008b <sup>261</sup>   | 66 | Double-blind | No  | Probably Yes  | Yes | Yes | Yes | NR | Yes | Includes for-profit source                         | Documented by medical personnel                                                                                                | Low     | 24 |
| Välimäki 2007 <sup>262</sup>  | 67 | Double-blind | No  | Probably Yes  | Yes | Yes | Yes | NR | Yes | Includes for-profit source                         | Documented by medical personnel                                                                                                | Low     | 24 |
| Chesnut 2004 <sup>263</sup>   | 68 | Double-blind | No  | Probably Yes  | Yes | NR  | NR  | NR | Yes | Includes for-profit source                         | Documented by medical personnel                                                                                                | Low     | 36 |
| Watts 1990 <sup>87</sup>      | 69 | Double-blind | No  | Probably Yes  | Yes | Yes | Yes | NR | Yes | NR                                                 | Medical records or radiologic reports                                                                                          | Low     | 24 |
| Leder 2015 <sup>153</sup>     | 70 | Double-blind | No  | Probably Yes  | Yes | Yes | Yes | NR | Yes | Includes for-profit source                         | NR                                                                                                                             | Low     | 6  |
| McClung 2014 <sup>154</sup>   | 71 | Double-blind | No  | Probably Yes  | Yes | Yes | Yes | NR | Yes | Includes for-profit source                         | Documented by medical personnel                                                                                                | Low     | 12 |
| Chesnut 2000 <sup>160</sup>   | 72 | Double-blind | No  | Probably Yes  | Yes | NR  | NR  | NR | Yes | Includes for-profit source                         | Medical records or radiologic reports                                                                                          | Low     | 36 |
| Clemmesen 1997 <sup>264</sup> | 73 | Double-blind | No  | Probably No   | Yes | Yes | NR  | NR | Yes | Not reported or unclear                            | Documented by medical personnel                                                                                                | High    | 24 |
| Cummings 2008 <sup>163</sup>  | 74 | Double-blind | No  | Probably No   | Yes | NR  | Yes | NR | Yes | Includes for-profit source                         | Documented by medical personnel                                                                                                | High    | 34 |
| Henriksen 2016 <sup>171</sup> | 75 | Double-blind | No  | Probably Yes  | Yes | Yes | Yes | NR | Yes | Includes for-profit source                         | Documented by medical personnel                                                                                                | Low     | 36 |
| Hooper 2005 <sup>173</sup>    | 76 | Double-blind | No  | Probably Yes  | Yes | NR  | NR  | NR | Yes | Includes for-profit source                         | Documented by medical personnel                                                                                                | Low     | 24 |
| Ishida 2004 <sup>175</sup>    | 77 | RCT          | No  | NR or unclear | NR  | NR  | NR  | NR | NR  | Not reported or unclear                            | Documented by medical personnel                                                                                                | High    | 24 |
| Itabashi 2011 <sup>265</sup>  | 78 | Double-blind | No  | NR or unclear | Yes | NR  | NR  | NR | Yes | Includes for-profit source                         | Vertebral fractures by medical personnel, non-vertebral by self-report                                                         | High    | 26 |
| Iwamoto 2011 <sup>#266</sup>  | 79 | RCT          | Yes | NR or unclear | Yes | NR  | NR  | NR | NR  | Only not for profit source                         | Documented by medical personnel                                                                                                | High    | 6  |
| Koh 2016 <sup>180</sup>       | 80 | Double-blind | No  | NR or unclear | Yes | Yes | Yes | NR | Yes | Includes for-profit source                         | Documented by medical personnel                                                                                                | Unclear | 6  |
| Lufkin 1992 <sup>184</sup>    | 81 | Double-blind | No  | NR or unclear | Yes | NR  | NR  | NR | Yes | Includes for-profit source                         | Documented by medical personnel                                                                                                | High    | 12 |
| Morii 2003 <sup>^186</sup>    | 82 | Double-blind | Yes | Probably Yes  | Yes | Yes | NR  | NR | Yes | Includes for-profit source                         | Vertebral fractures by medical personnel, non-vertebral not specified                                                          | Low     | 12 |

|                                 |    |              |    |               |     |     |     |    |     |                            |                                       |         |    |
|---------------------------------|----|--------------|----|---------------|-----|-----|-----|----|-----|----------------------------|---------------------------------------|---------|----|
| Nakamura 2012a <sup>267</sup>   | 83 | Double-blind | No | Probably Yes  | Yes | NR  | NR  | NR | Yes | Includes for-profit source | Documented by medical personnel       | Low     | 12 |
| Nakamura 2012b <sup>268</sup>   | 84 | Double-blind | No | NR or unclear | Yes | Yes | NR  | NR | Yes | Includes for-profit source | Medical records or radiologic reports | High    | 18 |
| Overgaard 1992 <sup>193</sup>   | 85 | Double-blind | No | Probably Yes  | Yes | NR  | NR  | NR | Yes | Only not for-profit source | Documented by medical personnel       | Low     | 24 |
| Zhang 2009 <sup>269</sup>       | 86 | Double-blind | No | Probably Yes  | NR  | NR  | NR  | NR | NR  | NR                         | NR                                    | Unclear | 6  |
| Sugimoto 2019 <sup>270</sup>    | 87 | Double-blind | No | Probably Yes  | NR  | NR  | NR  | NR | NR  | Includes for-profit source | Medical records or radiologic reports | Unclear | 36 |
| Recker 2004 <sup>271</sup>      | 88 | Double-blind | No | Probably Yes  | Yes | Yes | NR  | NR | Yes | Includes for-profit source | Documented by medical personnel       | Low     | 36 |
| Rico 1995 <sup>198</sup>        | 89 | RCT          | No | NR or unclear | NR  | NR  | NR  | NR | NR  | Not reported or unclear    | Documented by medical personnel       | High    | 24 |
| Wimalawansa 1998 <sup>205</sup> | 90 | RCT          | No | Probably Yes  | NR  | Yes | NR  | NR | NR  | Not reported or unclear    | Documented by medical personnel       | Unclear | 48 |
| Miyauchi 2008 <sup>272</sup>    | 91 | Double-blind | No | Probably Yes  | Yes | Yes | Yes | NR | Yes | Includes for-profit source | NR                                    | Low     | 6  |
| Bai 2013 <sup>156</sup>         | 92 | RCT          | No | NR or unclear | NR  | NR  | NR  | NR | NR  | Only not for profit source | Documented by medical personnel       | High    | 24 |

CG (care giver), OA (outcome assessor), DC (data collector), DA (data analyst), P (patient), NR (not reported)

# Women in the Calcitonin group were significantly older and thinner; ^ Placebo had lower lumbar spine BMD; P = 0.004.

**eTable 6. Characteristics of the Included Trials and Participants.**

| First author, year                |    | Region | Trial phase | Study design |  | Age (yr) | White (%) | Calcium (mg/d) | Vitamin D (IU/d) | Arm | Sample size | Intervention                         | Follow up (months) |
|-----------------------------------|----|--------|-------------|--------------|--|----------|-----------|----------------|------------------|-----|-------------|--------------------------------------|--------------------|
| Saag 2017 <sup>223</sup>          | 1  | MN     | III         | Both         |  | 74.3     | 68.4      | 500 - 1,000    | 600 - 800        | 1   | 2046        | Romosozumab 210 mg/ mo, sc           | 12                 |
|                                   |    |        |             |              |  |          |           |                |                  | 2   | 2047        | Alendronate 70 mg/ wk, oral          |                    |
| Cosman 2016 <sup>76</sup>         | 2  | MN     | III         | Both         |  | 70.8     | 60.4      | 500 - 1,000    | 600 - 800        | 1   | 3589        | Romosozumab 210 mg/mo,sc             | 12                 |
|                                   |    |        |             |              |  |          |           |                |                  | 2   | 3591        | Placebo                              |                    |
| Ishibashi 2017 <sup>152</sup>     | 3  | MN     | III         | RCT          |  | 67.7     | 0         | ≥500           | ≥600             | 1   | 189         | Romosozumab 70, 140 or 210 mg/mo, sc | 12                 |
|                                   |    |        |             |              |  |          |           |                |                  | 2   | 63          | Placebo                              |                    |
| Cosman 2017 <sup>78</sup>         | 4  | MN     | III         | Open-label   |  | 68.6     | 77.3      | 500 - 1,000    | 400 - 800        | 1   | 558         | Abaloparatide 80 µg/ d, sc           | 18                 |
|                                   |    |        |             |              |  |          |           |                |                  | 2   | 581         | Placebo                              |                    |
| Miller 2016a <sup>224</sup>       | 5  | MN     | III         | Double-blind |  | 69.0     | 79.7      | 500-1,000      | 400 - 800        | 1   | 824         | Abaloparatide 80 µg/ d, sc           | 18                 |
|                                   |    |        |             |              |  |          |           |                |                  | 2   | 818         | Teriparatide 20 µg/d, sc             |                    |
|                                   |    |        |             |              |  |          |           |                |                  | 3   | 821         | Placebo                              |                    |
| Langdahl 2017 <sup>225</sup>      | 6  | MN     | III         | Open-label   |  | 71.5     | 89.0      | 500 - 1,000    | 600 - 800        | 1   | 218         | Romosozumab 210 mg/mo, sc            | 12                 |
|                                   |    |        |             |              |  |          |           |                |                  | 2   | 218         | Teriparatide 20 mg/d, sc             |                    |
| Kendler 2018 <sup>226</sup>       | 7  | MN     | III         | Double-blind |  | 72.1     | 97.5      | 500 - 1,000    | 400 - 800        | 1   | 680         | Teriparatide 20 mg/d, sc             | 24                 |
|                                   |    |        |             |              |  |          |           |                |                  | 2   | 680         | Risedronate 35 mg/wk, oral           |                    |
| Cummings 2010 <sup>88</sup>       | 8  | MN     | III         | Double-blind |  | 67.5     | 74.2      | 1,000          | 400 - 800        | 1   | 5704        | Lasofexifene 0.25 or 0.5 mg/d        | 60                 |
|                                   |    |        |             |              |  |          |           |                |                  | 2   | 2852        | Placebo                              |                    |
| Meunier 2004 <sup>227</sup>       | 9  | MN     | III         | Double-blind |  | 69.3     | NR        | 1,500          | 400 - 800        | 1   | 719         | Strontium ranelate 2 g/d, oral       | 36                 |
|                                   |    |        |             |              |  |          |           |                |                  | 2   | 723         | Placebo                              |                    |
| Reginster 2008 <sup>228</sup>     | 10 | MN     | III         | Double-blind |  | 76.7     | NR        | >1,000         | 400 - 800        | 1   | 2479        | Strontium ranelate 2 g/d, oral       | 60                 |
|                                   |    |        |             |              |  |          |           |                |                  | 2   | 2456        | Placebo                              |                    |
| Hadji 2012 <sup>229</sup>         | 11 | MN     | III         | Double-blind |  | 71.0     | 80.4      | 1,000          | 800              | 1   | 360         | Teriparatide 20 µg/d, sc             | 18                 |
|                                   |    |        |             |              |  |          |           |                |                  | 2   | 350         | Risedronate 35 mg/wk, oral           |                    |
| Reginster 2000 <sup>230</sup>     | 12 | MN     | III         | Double-blind |  | 71.0     | 96.0      | 1000           | 500              | 1   | 815         | Risedronate 2.5 or 5 mg/d, oral      | 36                 |
|                                   |    |        |             |              |  |          |           |                |                  | 2   | 707         | Placebo                              |                    |
| Fogelman 2000 <sup>231</sup>      | 13 | MN     | III         | Double-blind |  | 64.5     | 100.0     | 1000           | NR               | 1   | 364         | Risedronate 2.5 or 5 mg/d, oral      | 24                 |
|                                   |    |        |             |              |  |          |           |                |                  | 2   | 180         | Placebo                              |                    |
| Anastasilakis 2008 <sup>232</sup> | 14 | Greece | II          | Open-label   |  | 65.1     | 100       | 500            | 400              | 1   | 22          | Risedronate 35 mg/wk, oral           | 12                 |
|                                   |    |        |             |              |  |          |           |                |                  | 2   | 22          | Teriparatide 20 µg/d, sc             |                    |
| Cosman 2011 <sup>233</sup>        | 15 | MN     | III         | Double-blind |  | 64.9     | 97.6      | 1000 - 1200    | 400 - 800        | 1   | 180         | Zoledronate 5 mg/y, iv               | 12                 |
|                                   |    |        |             |              |  |          |           |                |                  | 2   | 138         | Teriparatide 20 µg/d, sc             |                    |
| Neer 2001 <sup>234</sup>          | 16 | MN     | III         | RCT          |  | 69       | 99        | 1000           | 400 -1200        | 1   | 1085        | Teriparatide 20 or 40 µg/d, sc       | 21                 |
|                                   |    |        |             |              |  |          |           |                |                  | 2   | 552         | Placebo                              |                    |
| McClung 2005 <sup>97</sup>        | 17 | MN     | III         | Double-blind |  | 65.9     | 62.0      | 1000           | 400 - 800        | 1   | 102         | Teriparatide 20 µg/d, sc             | 18                 |
|                                   |    |        |             |              |  |          |           |                |                  | 2   | 101         | Alendronate 10 mg/d, oral            |                    |
| Lieberman 1995 <sup>80</sup>      | 18 | MN     | III         | Double-blind |  | 64.0     | 100.0     | 500            | NR               | 1   | 597         | Alendronate 5 or 10 mg/d, oral       | 36                 |
|                                   |    |        |             |              |  |          |           |                |                  | 2   | 397         | Placebo                              |                    |
| Black 2006 <sup>235</sup>         | 19 | MN     | III         | Double-blind |  | 73.2     | 97.4      | 500            | 250              | 1   | 662         | Alendronate 5 or 10 mg/d, oral       | 60                 |

|                               |    |             |     |              |  |      |       |            |            |   |       |                                                               |    |
|-------------------------------|----|-------------|-----|--------------|--|------|-------|------------|------------|---|-------|---------------------------------------------------------------|----|
|                               |    |             |     |              |  |      |       |            |            | 2 | 437   | Placebo                                                       |    |
| Black 1996 <sup>104</sup>     | 20 | MN          | III | Double-blind |  | 70.8 | 97.0  | 500        | 250        | 1 | 1022  | Alendronate 5 or 10 mg/d, oral                                | 36 |
|                               |    |             |     |              |  |      |       |            |            | 2 | 1005  | Placebo                                                       |    |
| Cummings 1998 <sup>105</sup>  | 21 | MN          | III | Double-blind |  | 68.0 | 97.0  | 500        | 250        | 1 | 2214  | Alendronate 5 or 10 mg/d, oral                                | 48 |
|                               |    |             |     |              |  |      |       |            |            | 2 | 2218  | Placebo                                                       |    |
| McClung 2006a <sup>236</sup>  | 22 | MN          | III | Both         |  | 63.2 | 85.0  | 1000       | 400        | 1 | 47    | Alendronate 70 mg/ wk, oral                                   | 12 |
|                               |    |             |     |              |  |      |       |            |            | 2 | 272   | Denosumab 6, 14 or 30 mg/3 mo; 14, 60, 100 or 210 mg/6 mo, sc |    |
|                               |    |             |     |              |  |      |       |            |            | 3 | 46    | Placebo                                                       |    |
| Harris 1999 <sup>237</sup>    | 23 | MN          | III | Double-blind |  | 69.0 | 96.0  | 1000       | 500        | 1 | 821   | Risedronate 5 mg/d, oral                                      | 36 |
|                               |    |             |     |              |  |      |       |            |            | 2 | 820   | Placebo                                                       |    |
| McClung 2001 <sup>83</sup>    | 24 | MN          | III | RCT          |  | 77.7 | 98.0  | 1000       | ≤500       | 1 | 3104  | Risedronate 5 mg/d, oral                                      | 36 |
|                               |    |             |     |              |  |      |       |            |            | 2 | 3134  | Placebo                                                       |    |
| Black 2007 <sup>238</sup>     | 25 | MN          | III | Double-blind |  | 73.1 | 86.0  | 1000 -1500 | 400 - 1200 | 1 | 3875  | Zoledronate 5 mg/12 months, iv                                | 36 |
|                               |    |             |     |              |  |      |       |            |            | 2 | 3861  | Placebo                                                       |    |
| Reid 2018 <sup>106</sup>      | 26 | New Zealand | III | Double-blind |  | 71.0 | 94.5  | 1000       | 50000/mo   | 1 | 1000  | Zoledronate 5 mg/18 months, iv                                | 72 |
|                               |    |             |     |              |  |      |       |            |            | 2 | 1000  | Placebo                                                       |    |
| Bone 2008 <sup>107</sup>      | 27 | MN          | III | Double-blind |  | 59.4 | 83.0  | 1000       | 400 - 800  | 1 | 166   | Denosumab 60 mg/6 mo, sc                                      | 24 |
|                               |    |             |     |              |  |      |       |            |            | 2 | 166   | Placebo                                                       |    |
| Bone 2018 <sup>79</sup>       | 28 | MN          | III | Open-label   |  | 70.1 | 77.3  | 500 - 1000 | 400 - 800  | 1 | 558   | Abaloparatide 80 mg/d, sc                                     | 24 |
|                               |    |             |     |              |  |      |       |            |            | 2 | 581   | Placebo                                                       |    |
| Cummings 2009 <sup>85</sup>   | 29 | MN          | III | Double-blind |  | 72.3 | 99.0  | ≥1000      | ≥800       | 1 | 3,902 | Denosumab 60 mg/6 mo, sc                                      | 36 |
|                               |    |             |     |              |  |      |       |            |            | 2 | 3,906 | Placebo                                                       |    |
| Miller 2016b <sup>110</sup>   | 30 | MN          | III | Double-blind |  | 69.0 | 96.9  | ≥1000      | ≥800       | 1 | 320   | Denosumab 60 mg/6 mo, sc                                      | 12 |
|                               |    |             |     |              |  |      |       |            |            | 2 | 320   | Zoledronate 5 mg/12 mo, iv                                    |    |
| Brown 2009 <sup>239</sup>     | 31 | MN          | III | Double-blind |  | 64.4 | 84.4  | ≥500       | ≥400       | 1 | 594   | Denosumab 60 mg/6 mo, sc                                      | 12 |
|                               |    |             |     |              |  |      |       |            |            | 2 | 595   | Alendronate 70 mg/ wk, oral                                   |    |
| Roux 2014 <sup>57</sup>       | 32 | MN          | III | Open-label   |  | 67.7 | 97.6  | ≥1000      | ≥800       | 1 | 435   | Denosumab 60 mg/6 mo, sc                                      | 12 |
|                               |    |             |     |              |  |      |       |            |            | 2 | 435   | Risedronate 150 mo, oral                                      |    |
| Greenspan 2015 <sup>240</sup> | 33 | MN          | III | Double-blind |  | 85.5 | NR    | 1200       | 800        | 1 | 89    | Zoledronate 5 mg/24 mo, iv                                    | 24 |
|                               |    |             |     |              |  |      |       |            |            | 2 | 92    | Placebo                                                       |    |
| McClung 2009b <sup>138</sup>  | 34 | MN          | III | Double-blind |  | 60   | 92.7  | 500 - 1200 | 400 - 800  | 1 | 198   | Zoledronate 5 mg/y, iv                                        | 24 |
|                               |    |             |     |              |  |      |       |            |            | 2 | 181   | Zoledronate 5 mg/24 mo, iv                                    |    |
|                               |    |             |     |              |  |      |       |            |            | 3 | 202   | Placebo                                                       |    |
| Boonen 2010 <sup>241</sup>    | 35 | MN          | III | Double-blind |  | >75  | NR    | 1000 -1500 | 400 - 1200 | 1 | 1,961 | Zoledronate 5 mg/y, iv                                        | 36 |
|                               |    |             |     |              |  |      |       |            |            | 2 | 1,927 | Placebo                                                       |    |
| Hwang 2011 <sup>242</sup>     | 36 | MN          | III | Double-blind |  | 72.5 | Asian | 1000 -1500 | 400 - 1200 | 1 | 163   | Zoledronate 5 mg/y, iv                                        | 36 |
|                               |    |             |     |              |  |      |       |            |            | 2 | 160   | Placebo                                                       |    |
| Recknor 2013 <sup>243</sup>   | 37 | MN          | III | Open-label   |  | 66.7 | 85.1  | ≥500       | ≥800       | 1 | 417   | Denosumab 60 mg/6 mo, sc                                      | 12 |
|                               |    |             |     |              |  |      |       |            |            | 2 | 416   | Ibandronate 150 mg/mo, oral                                   |    |
| Miller 2008a <sup>244</sup>   | 38 | MN          | III | Double-blind |  | 65.6 | 82.1  | 500        | 400        | 1 | 874   | Ibandronate 150 mg/mo, oral                                   | 12 |
|                               |    |             |     |              |  |      |       |            |            | 2 | 859   | Alendronate 70 mg/ wk, oral                                   |    |
| McClung 2009a <sup>114</sup>  | 39 | MN          | III | Double-blind |  | 53.5 | 100.0 | 500        | 400        | 1 | 77    | Ibandronate 150 mg/mo, oral                                   | 12 |
|                               |    |             |     |              |  |      |       |            |            | 2 | 83    | Placebo                                                       |    |
| Bock 2012 <sup>245</sup>      | 40 | Germany     | III | Double-blind |  | 69.0 | 100.0 | 500        | 400        | 1 | 35    | Ibandronate 150 mg/mo, oral                                   | 12 |
|                               |    |             |     |              |  |      |       |            |            | 2 | 33    | Placebo                                                       |    |

|                                 |    |       |     |              |  |      |         |           |           |   |      |                                              |       |
|---------------------------------|----|-------|-----|--------------|--|------|---------|-----------|-----------|---|------|----------------------------------------------|-------|
| Cooper 2006 <sup>208</sup>      | 41 | MN    | II  | Open-label   |  | 67.8 | 96.7    | NR        | NR        | 1 | 547  | Ibandronate 150 mg/mo, oral                  | 6     |
|                                 |    |       |     |              |  |      |         |           |           | 2 | 529  | Alendronate 70 mg/ wk, oral                  |       |
| Greenspan 2007 <sup>73</sup>    | 42 | MN    | III | Double-blind |  | 64.4 | 84.8    | 700       | 400       | 1 | 1286 | PTH 100 µg/d, sc                             | 18    |
|                                 |    |       |     |              |  |      |         |           |           | 2 | 1246 | Placebo                                      |       |
| Fogelman 2008 <sup>246</sup>    | 43 | MN    | III | Double-blind |  | 58.8 | 100.0   | 1050      | 800       | 1 | 90   | PTH 100 µg/d, sc                             | 24    |
|                                 |    |       |     |              |  |      |         |           |           | 2 | 90   | Placebo                                      |       |
| Ensrud 2008 <sup>119</sup>      | 44 | MN    | III | Double-blind |  | 67.5 | 84.0    | NR        | NR        | 1 | 5044 | Raloxifene 60 mg/d oral                      | 5.6yr |
|                                 |    |       |     |              |  |      |         |           |           | 2 | 5057 | Placebo                                      |       |
| Ettinger 1999 <sup>89</sup>     | 45 | MN    | III | Double-blind |  | 65.0 | 95.7    | 500       | 400 - 600 | 1 | 5129 | Raloxifene 60 or 120 mg/d oral               | 36    |
|                                 |    |       |     |              |  |      |         |           |           | 2 | 2576 | Placebo                                      |       |
| Sambrook 2004 <sup>247</sup>    | 46 | MN    | III | Double-blind |  | 61.6 | 79.1    | NR        | NR        | 1 | 241  | Raloxifene 60 mg/d oral                      | 12    |
|                                 |    |       |     |              |  |      |         |           |           | 2 | 246  | Alendronate 70 mg/ wk, oral                  |       |
| Bone 1997 <sup>137</sup>        | 47 | MN    | III | Double-blind |  | 70.9 | 97.3    | 500       | NR        | 1 | 268  | Alendronate 1.0, 2.5 or 5 mg/d, oral         | 24    |
|                                 |    |       |     |              |  |      |         |           |           | 4 | 91   | Placebo                                      |       |
| Recker 2007 <sup>122</sup>      | 48 | MN    | III | Double-blind |  | 65.6 | 86.8    | 500       | 400       | 1 | 707  | Raloxifene 60 mg/d oral                      | 5yr   |
|                                 |    |       |     |              |  |      |         |           |           | 2 | 716  | Alendronate 10 mg/d, oral                    |       |
| Lufkin 1998 <sup>248</sup>      | 49 | MN    | III | Double-blind |  | 69.1 | 100.0   | 750       | 800       | 1 | 95   | Raloxifene 60 or 120 mg/d oral               | 12    |
|                                 |    |       |     |              |  |      |         |           |           | 2 | 45   | Placebo                                      |       |
| Luckey 2004 <sup>249</sup>      | 50 | MN    | III | Double-blind |  | 64   | 92      | 500       | 200       | 1 | 233  | Alendronate 70 mg/ wk, oral                  | 12    |
|                                 |    |       |     |              |  |      |         |           |           | 2 | 223  | Raloxifene 60 mg/d oral                      |       |
| Kendler 2010 <sup>#250</sup>    | 51 | MN    | III | Double-blind |  | 67.6 | NR      | 1000      | 400       | 1 | 253  | Denosumab 60 mg/6 mo, sc                     | 12    |
|                                 |    |       |     |              |  |      |         |           |           | 2 | 249  | Alendronate 70 mg/ wk, oral                  |       |
| Tucci 1996 <sup>251</sup>       | 52 | MN    | III | Double-blind |  | 64.7 | 91      | 500       | NR        | 1 | 192  | Alendronate 5/10 mg/d, oral                  | 36    |
|                                 |    |       |     |              |  |      |         |           |           | 2 | 192  | Placebo                                      |       |
| Silverman 2008 <sup>252</sup>   | 53 | MN    | III | Double-blind |  | 66.4 | 87      | ≤1,200    | 400 – 800 | 1 | 1886 | Bazedoxifene 20 mg/d oral                    | 36    |
|                                 |    |       |     |              |  |      |         |           |           | 2 | 1872 | Bazedoxifene 40 mg/d oral                    |       |
|                                 |    |       |     |              |  |      |         |           |           | 3 | 1849 | Raloxifene 60 mg/d oral                      |       |
|                                 |    |       |     |              |  |      |         |           |           | 4 | 1885 | Placebo                                      |       |
| Pols 1999 <sup>135</sup>        | 54 | MN    | III | Double-blind |  | 62.8 | 94      | 500       | NR        | 1 | 950  | Alendronate 10 mg/d, oral                    | 12    |
|                                 |    |       |     |              |  |      |         |           |           | 2 | 958  | Placebo                                      |       |
| Bell 2002 <sup>253</sup>        | 55 | MN    | III | Double-blind |  |      | African | 500       | 500       | 1 | 50   | Alendronate 10 mg/d, oral                    | 24    |
|                                 |    |       |     |              |  |      |         |           |           | 2 | 50   | Placebo                                      |       |
| Chailurkit 2003 <sup>254</sup>  | 56 | Thai  | III | NR           |  | 62   | Asian   | 500       | NR        | 1 | 32   | Alendronate 10 mg/d, oral                    | 12    |
|                                 |    |       |     |              |  |      |         |           |           | 2 | 38   | Placebo                                      |       |
| Rosen 2005 <sup>255</sup>       | 57 | MN    | III | Double-blind |  | 64.5 | 95.3    | 1000      | 400       | 1 | 520  | Alendronate 70 mg/ wk, oral                  | 12    |
|                                 |    |       |     |              |  |      |         |           |           | 2 | 533  | Risedronate 35 mg/d, oral                    |       |
| Seeman 2010 <sup>256</sup>      | 58 | MN    | II  | Double-blind |  | 60.6 | 96      | ≥500      | ≥400      | 1 | 82   | Alendronate 70 mg/ wk, oral                  | 12    |
|                                 |    |       |     |              |  |      |         |           |           | 2 | 83   | Denosumab 60 mg/6 mo, sc                     |       |
|                                 |    |       |     |              |  |      |         |           |           | 3 | 82   | Placebo                                      |       |
| Finkelstein 2010 <sup>257</sup> | 59 | USA   | II  | RCT          |  | 64.4 | NR      | 1000–1200 | 400       | 1 | 29   | Alendronate 10 mg/d, oral                    | 6     |
|                                 |    |       |     |              |  |      |         |           |           | 2 | 20   | Teriparatide 40 µg/d, sc                     |       |
| Kung 2000 <sup>258</sup>        | 60 | China | III | Double-blind |  | 64.5 | Asian   | 500       | NR        | 1 | 35   | Alendronate 10 mg/d, oral                    | 12    |
|                                 |    |       |     |              |  |      |         |           |           | 2 | 35   | Placebo                                      |       |
| Meunier 2002 <sup>259</sup>     | 61 | MN    | III | Double-blind |  | 66.2 | 100     | 500       | 800       | 1 | 262  | Strontium ranelate 0.5, 1.0 or 2.0 g/d, oral | 24    |
|                                 |    |       |     |              |  |      |         |           |           | 2 | 91   | Placebo                                      |       |
| Roux 2008 <sup>91</sup>         | 62 | MN    | III | Double-blind |  | 60   | NR      | NR        | NR        | 1 | 168  | Strontium ranelate 2 g/d, oral               | 48    |



|                               |    |       |     |              |  |      |       |            |            |   |      |                                                                                                    |    |
|-------------------------------|----|-------|-----|--------------|--|------|-------|------------|------------|---|------|----------------------------------------------------------------------------------------------------|----|
|                               |    |       |     |              |  |      |       |            |            | 2 | 185  | Placebo                                                                                            |    |
| McClung 2006b <sup>139</sup>  | 63 | MN    | III | Double-blind |  | 58.5 | NR    | 1000       | 250        | 1 | 164  | Lasofloxifene 0.25 or 1.0 mg/d                                                                     | 24 |
|                               |    |       |     |              |  |      |       |            |            | 2 | 163  | Raloxifene 60 mg/d oral                                                                            |    |
|                               |    |       |     |              |  |      |       |            |            | 3 | 83   | Placebo                                                                                            |    |
| Meunier 2009 <sup>260</sup>   | 64 | MN    | III | Double-blind |  | 69.3 | 100   | NR         | NR         | 1 | 719  | Strontium ranelate 2.0 g/d, oral                                                                   | 48 |
|                               |    |       |     |              |  |      |       |            |            | 2 | 726  | Placebo                                                                                            |    |
| Hwang 2008 <sup>212</sup>     | 65 | MN    | III | Double-blind |  | 65   | Asian | 500        | 800        | 1 | 64   | Strontium ranelate 2.0 g/d, oral                                                                   | 12 |
|                               |    |       |     |              |  |      |       |            |            | 2 | 61   | Placebo                                                                                            |    |
| Miller 2008b <sup>261</sup>   | 66 | MN    | III | Double-blind |  | 57.8 | 94    | 600        | NR         | 1 | 962  | Bazedoxifene 10, 20 or 40 mg/d oral                                                                | 24 |
|                               |    |       |     |              |  |      |       |            |            | 2 | 311  | Raloxifene 60 mg/d oral                                                                            |    |
|                               |    |       |     |              |  |      |       |            |            | 3 | 310  | Placebo                                                                                            |    |
| Välimäki 2007 <sup>262</sup>  | 67 | MN    | III | Double-blind |  | 65.9 | 100   | 1000       | 400        | 1 | 114  | Risedronate 5 mg/d, oral                                                                           | 24 |
|                               |    |       |     |              |  |      |       |            |            | 2 | 57   | Placebo                                                                                            |    |
| Chesnut 2004 <sup>263</sup>   | 68 | MN    | III | Double-blind |  | 69   | NR    | 500        | 400        | 1 | 975  | Ibandronate 2.5 mg/d, oral                                                                         | 36 |
|                               |    |       |     |              |  |      |       |            |            | 2 | 977  | Ibandronate 20 mg every other day for 12 doses every 3 months                                      |    |
|                               |    |       |     |              |  |      |       |            |            | 3 | 977  | Placebo                                                                                            |    |
| Watts 1990 <sup>87</sup>      | 69 | MN    | III | Double-blind |  | 65   | NR    | ≥1000      | ≥1000      | 1 | 195  | Etidronate 400 mg/d, oral                                                                          | 24 |
|                               |    |       |     |              |  |      |       |            |            | 2 | 183  | Placebo                                                                                            |    |
| Leder 2015 <sup>153</sup>     | 70 | MN    | III | Double-blind |  | 65.0 | 61.3  | 400 - 800  | 500 - 1000 | 1 | 131  | Abaloparatide 20, 40 or 80 mg/d, sc                                                                | 6  |
|                               |    |       |     |              |  |      |       |            |            | 2 | 45   | Teriparatide 20 µg/d, sc                                                                           |    |
|                               |    |       |     |              |  |      |       |            |            | 5 | 45   | Placebo                                                                                            |    |
| McClung 2014 <sup>154</sup>   | 71 | MN    | III | Double-blind |  | 66.5 | 86    | 1000       | 800        | 1 | 51   | Romozosumab 70, 140, 210 mg/mo or 140, 210 mg/ 3mo, sc                                             | 12 |
|                               |    |       |     |              |  |      |       |            |            | 2 | 55   | Teriparatide 20 µg/d, sc                                                                           |    |
|                               |    |       |     |              |  |      |       |            |            | 3 | 51   | Alendronate 70 mg/ wk, oral                                                                        |    |
|                               |    |       |     |              |  |      |       |            |            | 4 | 52   | Placebo                                                                                            |    |
| Chesnut 2000 <sup>160</sup>   | 72 | MN    | III | Double-blind |  | 68.3 | NR    | 1000       | 400        | 1 | 944  | Salmon calcitonin intranasal 100, 200, or 400 IU/day                                               | 36 |
|                               |    |       |     |              |  |      |       |            |            | 2 | 311  | Placebo                                                                                            |    |
| Clemmesen 1997 <sup>264</sup> | 73 | MN    | II  | Double-blind |  | 68   | NR    | 1000       | NR         | 1 | 44   | Risedronate 2.5 mg/d (continuous), oral                                                            | 24 |
|                               |    |       |     |              |  |      |       |            |            | 2 | 44   | Risedronate 2.5 mg/d ((2.5 mg daily risedronate for 2 weeks followed by 10 weeks on placebo), oral |    |
|                               |    |       |     |              |  |      |       |            |            | 3 | 44   | Placebo                                                                                            |    |
| Cummings 2008 <sup>163</sup>  | 74 | MN    | III | Double-blind |  | 68.3 | NR    | 315        | 200        | 1 | 2267 | Hormone replacement therapy (tibolone 1.25 mg/d)                                                   | 34 |
|                               |    |       |     |              |  |      |       |            |            | 2 | 2267 | Placebo                                                                                            |    |
| Henriksen 2016 <sup>171</sup> | 75 | MN    | III | Double-blind |  | 66.8 | 66.5  | 800 - 1000 | 400 - 800  | 1 | 2334 | Salmon calcitonin 0.8 mg/d, oral                                                                   | 36 |
|                               |    |       |     |              |  |      |       |            |            | 2 | 2331 | Placebo                                                                                            |    |
| Hooper 2005 <sup>173</sup>    | 76 | MN    | III | Double-blind |  | 53   | 98    | 1000       | NR         | 1 | 257  | Risedronate 2.5 or 5 mg/d, oral                                                                    | 24 |
|                               |    |       |     |              |  |      |       |            |            | 2 | 126  | Placebo                                                                                            |    |
| Ishida 2004 <sup>175</sup>    | 77 | Japan | III | RCT          |  | 69.5 | NR    | NR         | NR         | 1 | 66   | Hormone replacement therapy (conjugated estrogen 0.625 mg/d plus medroxyprogesterone 2.5 mg/d)     | 24 |
|                               |    |       |     |              |  |      |       |            |            | 2 | 66   | Etidronate                                                                                         |    |
|                               |    |       |     |              |  |      |       |            |            | 3 | 66   | Eel calcitonin 20 IU/wk                                                                            |    |
|                               |    |       |     |              |  |      |       |            |            | 4 | 66   | Placebo                                                                                            |    |
| Itabashi 2011 <sup>265</sup>  | 78 | MN    | III | Double-blind |  | 63   | Asian | 610        | 400        | 1 | 283  | Bazedoxifene 20 or 40 mg/d oral                                                                    | 26 |
|                               |    |       |     |              |  |      |       |            |            | 2 | 142  | Placebo                                                                                            |    |
| Iwamoto 2011 <sup>266</sup>   | 79 | MN    | III | RCT          |  | 79.8 | NR    | NR         | NR         | 1 | 97   | Alendronate 35 mg/wk, oral                                                                         | 6  |
|                               |    |       |     |              |  |      |       |            |            | 2 | 97   | Calcitonin im 20 IU/week                                                                           |    |
| Koh 2016 <sup>180</sup>       | 80 | MN    | III | Double-blind |  | 66.5 | 100   | ≥1000      | ≥400       | 1 | 69   | Denosumab 60 mg/6 mo, sc                                                                           | 6  |

|                                 |    |         |     |              |  |       |       |      |     |   |      |                                                                                                |    |
|---------------------------------|----|---------|-----|--------------|--|-------|-------|------|-----|---|------|------------------------------------------------------------------------------------------------|----|
|                                 |    |         |     |              |  |       |       |      |     | 2 | 66   | Placebo                                                                                        |    |
| Lufkin 1992 <sup>184</sup>      | 81 | MN      | III | Double-blind |  | 64.7  | NR    | NR   | NR  | 1 | 36   | Hormone replacement therapy (Estradiol 0.1 mg/day +MPA 10 mg/day)                              | 12 |
|                                 |    |         |     |              |  |       |       |      |     | 2 | 39   | Placebo                                                                                        |    |
| Morii 2003 <sup>186</sup>       | 82 | MN      | III | Double-blind |  | 64.7  | Asian | 500  | 200 | 1 | 183  | Raloxifene 60 or 120 mg/d oral                                                                 | 12 |
|                                 |    |         |     |              |  |       |       |      |     | 2 | 97   | Placebo                                                                                        |    |
| Nakamura 2012a <sup>267</sup>   | 83 | MN      | III | Double-blind |  | 65.1  | Asian | 600  | 400 | 1 | 157  | Denosumab 14, 60 or 100 mg/6 mo, sc                                                            | 12 |
|                                 |    |         |     |              |  |       |       |      |     | 2 | 55   | Placebo                                                                                        |    |
| Nakamura 2012b <sup>268</sup>   | 84 | MN      | III | Double-blind |  | 75.3  | Asian | 610  | 400 | 1 | 276  | Teriparatide 56.5 µg/wk, sc                                                                    | 18 |
|                                 |    |         |     |              |  |       |       |      |     | 2 | 273  | Placebo                                                                                        |    |
| Overgaard 1992 <sup>193</sup>   | 85 | MN      | III | Double-blind |  | 68-72 | NR    | 500  | No  | 1 | 156  | Salmon calcitonin 50, 100 or 200 IU/day, intranasal                                            | 24 |
|                                 |    |         |     |              |  |       |       |      |     | 2 | 52   | Placebo                                                                                        |    |
| Zhang 2009 <sup>269</sup>       | 86 | MN      | III | Double-blind |  | 65.25 | Asian | 600  | 125 | 1 | 100  | PTH 20 µg/d, sc                                                                                | 6  |
|                                 |    |         |     |              |  |       |       |      |     | 2 | 105  | Elcatonin 20 IU/wk                                                                             |    |
| Sugimoto 2019 <sup>270</sup>    | 87 | MN      | III | Double-blind |  | 75.5  | Asian | 400  | 400 | 1 | 433  | Elcatonin 20 IU/wk                                                                             | 36 |
|                                 |    |         |     |              |  |       |       |      |     | 2 | 436  | Placebo                                                                                        |    |
| Recker 2004 <sup>271</sup>      | 88 | MN      | III | Double-blind |  | 67    | NR    | 500  | 400 | 1 | 1912 | Ibandronate 0.5 or 1 mg/3 mo, iv                                                               | 36 |
|                                 |    |         |     |              |  |       |       |      |     | 2 | 950  | Placebo                                                                                        |    |
| Rico 1995 <sup>198</sup>        | 89 | Spain   | III | RCT          |  | 69.2  | NR    | 500  | No  | 1 | 36   | Salmon calcitonin im 100 IU/day for 10 days each month, intranasal                             | 24 |
|                                 |    |         |     |              |  |       |       |      |     | 2 | 36   | Placebo                                                                                        |    |
| Wimalawansa 1998 <sup>205</sup> | 90 | England | III | RCT          |  | 64.9  | 100   | 1000 | 400 | 1 | 18   | Hormone replacement therapy (premarin 0.625 mg/day + norgestrel 150 µg for 12 days each month) | 48 |
|                                 |    |         |     |              |  |       |       |      |     | 2 | 18   | Placebo                                                                                        |    |
| Miyauchi 2008 <sup>272</sup>    | 91 | MN      | III | Double-blind |  | 71.1  | Asian | 610  | 400 | 1 | 120  | Teriparatide 10 µg, 20 µg or 40 µg daily, sc                                                   | 6  |
|                                 |    |         |     |              |  |       |       |      |     | 2 | 39   | Placebo                                                                                        |    |
| Bai 2013 <sup>156</sup>         | 92 | China   | III | RCT          |  | 56.8  | Asian | 600  | 400 | 1 | 138  | Zoledronate 5 mg/y, iv                                                                         | 24 |
|                                 |    |         |     |              |  |       |       |      |     | 2 | 242  | Placebo                                                                                        |    |

# Subjects received open-label branded alendronate 70 mg once weekly for 1 month and then were randomly assigned to either continued weekly alendronate therapy or subcutaneous denosumab 60 mg every 6 months and were followed for 12 months.

^ patients in the strontium ranelate group were randomized either to switch to placebo (50%, SR/placebo group) or to continue on strontium ranelate 2 g/day (50%, SR/SR group), while all patients in the placebo group were switched to strontium ranelate 2 g/day. We did not extract the data of the fourth year. Patients were supplemented in vitamin D and calcium according to their need.

## Reference

1. Nakamura T, Tsujimoto M, Hamaya E, Sowa H, Chen P. Consistency of fracture risk reduction in Japanese and Caucasian osteoporosis patients treated with teriparatide: a meta-analysis. *J Bone Miner Metab.* 2012;30(3):321-325.
2. Jansen JP, Bergman GJ, Huels J, Olson M. The efficacy of bisphosphonates in the prevention of vertebral, hip, and nonvertebral-nonhip fractures in osteoporosis: a network meta-analysis. *Seminars in arthritis and rheumatism.* 2011;40(4):275-284.e271-272.
3. Lee YH, Song GG. Efficacy and safety of monthly 150 mg oral ibandronate in women with postmenopausal osteoporosis: a systematic review and meta-analysis of randomized controlled trials. *The Korean journal of internal medicine.* 2011;26(3):340-347.
4. von Keyserlingk C, Hopkins R, Anastasilakis A, et al. Clinical efficacy and safety of denosumab in postmenopausal women with low bone mineral density and osteoporosis: a meta-analysis. *Seminars in arthritis and rheumatism.* 2011;41(2):178-186.
5. Zhang J, Wang R, Zhao Y-L, et al. Efficacy of intravenous zoledronic acid in the prevention and treatment of osteoporosis: a meta-analysis. *Asian Pac J Trop Med.* 2012;5(9):743-748.
6. Lin T, Wang C, Cai XZ, et al. Comparison of clinical efficacy and safety between denosumab and alendronate in postmenopausal women with osteoporosis: A meta-analysis. *International journal of clinical practice.* 2012;66(4):399-408.
7. Migliore A, Broccoli S, Massafra U, Bizzi E, Frediani B. Mixed-treatment comparison of anabolic (teriparatide and PTH 1-84) therapies in women with severe osteoporosis. *Current medical research and opinion.* 2012;28(3):467-473.
8. Han SL, Wan SL. Effect of teriparatide on bone mineral density and fracture in postmenopausal osteoporosis: meta-analysis of randomised controlled trials. *International journal of clinical practice.* 2012;66(2):199-209.
9. Serrano AJ, Begoña L, Anitua E, Cobos R, Orive G. Systematic review and meta-analysis of the efficacy and safety of alendronate and zoledronate for the treatment of postmenopausal osteoporosis. *Gynecol Endocrinol.* 2013;29(12):1005-1014.



10. Song J, Jin Z, Chang F, Li L, Su Y. Single and combined use of human parathyroid hormone (PTH) (1-34) on areal bone mineral density (aBMD) in postmenopausal women with osteoporosis: evidence based on 9 RCTs. *Medical science monitor : international medical journal of experimental and clinical research*. 2014;20:2624-2632.
11. Diédhiou D, Cuny T, Sarr A, Norou Diop S, Klein M, Weryha G. Efficacy and safety of denosumab for the treatment of osteoporosis: A systematic review. *Ann Endocrinol (Paris)*. 2015;76(6):650-657.
12. Zhang L, Pang Y, Shi Y, et al. Indirect comparison of teriparatide, denosumab, and oral bisphosphonates for the prevention of vertebral and nonvertebral fractures in postmenopausal women with osteoporosis. *Menopause (New York, NY)*. 2015;22(9):1021-1025.
13. Gu H-F, Gu L-J, Wu Y, et al. Efficacy and Safety of Denosumab in Postmenopausal Women With Osteoporosis: A Meta-Analysis. *Medicine*. 2015;94(44):e1674.
14. Wang C. Efficacy and Safety of Zoledronic Acid for Treatment of Postmenopausal Osteoporosis: A Meta-Analysis of Randomized Controlled Trials. *Am J Ther*. 2017;24(5):e544-e552.
15. Liu CL, Lee HC, Chen CC, Cho DY. Head-to-head comparisons of bisphosphonates and teriparatide in osteoporosis: a meta-analysis. *Clinical and investigative medicine Medecine clinique et experimentale*. 2017;40(3):E146-e157.
16. Peng L, Luo Q, Lu H. Efficacy and safety of bazedoxifene in postmenopausal women with osteoporosis: A systematic review and meta-analysis. *Medicine*. 2017;96(49):e8659.
17. Wang YK, Qin SQ, Ma T, et al. Effects of teriparatide versus alendronate for treatment of postmenopausal osteoporosis: A meta-analysis of randomized controlled trials. *Medicine*. 2017;96(21):e6970.
18. Liu GF, Wang ZQ, Liu L, Zhang BT, Miao YY, Yu SN. A network meta-analysis on the short-term efficacy and adverse events of different anti-osteoporosis drugs for the treatment of postmenopausal osteoporosis. *Journal of cellular biochemistry*. 2018;119(6):4469-4481.
19. Fan G, Zhao Q, Lu P, et al. Comparison between teriparatide and bisphosphonates for improving bone mineral density in postmenopausal osteoporosis patients: A meta-analysis. *Medicine*. 2020;99(15):e18964.
20. Lyu H, Jundi B, Xu C, et al. Comparison of Denosumab and Bisphosphonates in Patients With Osteoporosis: A Meta-Analysis of Randomized Controlled Trials. *The Journal of clinical endocrinology and metabolism*. 2019;104(5):1753-1765.
21. Tan X, Wen F, Yang W, Xie JY, Ding LL, Mo YX. Comparative efficacy and safety of pharmacological interventions for osteoporosis in postmenopausal women: A network meta-analysis (Chongqing, China). *Menopause (New York, NY)*. 2019;26(8):929-939.
22. Yuan F, Peng W, Yang C, Zheng J. Teriparatide versus bisphosphonates for treatment of postmenopausal osteoporosis: A meta-analysis. *International journal of surgery (London, England)*. 2019;66:1-11.
23. Hernandez AV, Pérez-López FR, Piscoya A, et al. Comparative efficacy of bone anabolic therapies in women with postmenopausal osteoporosis: A systematic review and network meta-analysis of randomized controlled trials. *Maturitas*. 2019;129:12-22.
24. Reginster J, Bianic F, Campbell R, Martin M, Williams SA, Fitzpatrick LA. Abaloparatide for risk reduction of nonvertebral and vertebral fractures in postmenopausal women with osteoporosis: a network meta-analysis. *Osteoporosis international : a journal established as result of cooperation between the European Foundation for Osteoporosis and the National Osteoporosis Foundation of the USA*. 2019;30(7):1465-1473.
25. Barrionuevo P, Kapoor E, Asi N, et al. Efficacy of Pharmacological Therapies for the Prevention of Fractures in Postmenopausal Women: A Network Meta-Analysis. *The Journal of clinical endocrinology and metabolism*. 2019;104(5):1623-1630.
26. Yang C, Le G, Lu C, et al. Effects of teriparatide compared with risedronate in the treatment of osteoporosis: A meta-analysis of randomized controlled trials. *Medicine*. 2020;99(7):e19042.
27. Wen F, Du H, Ding L, et al. Clinical efficacy and safety of drug interventions for primary and secondary prevention of osteoporotic fractures in postmenopausal women: Network meta-analysis followed by factor and cluster analysis. *PloS one*. 2020;15(6):e0234123.
28. Hadji P, Zanchetta JR, Russo L, et al. The effect of teriparatide compared with risedronate on reduction of back pain in postmenopausal women with osteoporotic vertebral fractures. *Osteoporosis international : a journal established as result of cooperation between the European Foundation for Osteoporosis and the National Osteoporosis Foundation of the USA*. 2012;23(8):2141-2150.
29. Hadji P, Minne H, Pfeifer M, et al. Treatment preference for monthly oral ibandronate and weekly oral alendronate in women with postmenopausal osteoporosis: A randomized, crossover study (BALTO II). *Joint Bone Spine*. 2008;75(3):303-310.
30. Saag KG, Shane E, Boonen S, et al. Teriparatide or alendronate in glucocorticoid-induced osteoporosis. *The New England journal of medicine*. 2007;357(20):2028-2039.
31. Lewiecki EM, Keaveny TM, Kopperdahl DL, et al. Once-monthly oral ibandronate improves biomechanical determinants of bone strength in women with postmenopausal osteoporosis. *The Journal of clinical endocrinology and metabolism*. 2009;94(1):171-180.
32. Reginster JY, Adami S, Lakatos P, et al. Efficacy and tolerability of once-monthly oral ibandronate in postmenopausal osteoporosis: 2 year results from the MOBILE study. *Annals of the rheumatic diseases*. 2006;65(5):654-661.
33. Ellis GK, Bone HG, Chlebowski R, et al. Randomized trial of denosumab in patients receiving adjuvant aromatase inhibitors for nonmetastatic breast cancer. *J Clin Oncol*. 2008;26(30):4875-4882.
34. Black DM, Reid IR, Boonen S, et al. The effect of 3 versus 6 years of zoledronic acid treatment of osteoporosis: a randomized extension to the HORIZON-Pivotal Fracture Trial (PFT). *Journal of bone and mineral research : the official journal of the American Society for Bone and Mineral Research*. 2012;27(2):243-254.
35. Boonen S, Orwoll E, Magaziner J, et al. Once-yearly zoledronic acid in older men compared with women with recent hip fracture. *J Am Geriatr Soc*. 2011;59(11):2084-2090.
36. Sambrook PN, Roux C, Devogelaer J-P, et al. Bisphosphonates and glucocorticoid osteoporosis in men: results of a randomized controlled trial comparing zoledronic acid with risedronate. *Bone*. 2012;50(1):289-295.
37. Boonen S, Black DM, Colón-Emeric CS, et al. Efficacy and safety of a once-yearly intravenous zoledronic acid 5 mg for fracture prevention in elderly postmenopausal women with osteoporosis aged 75 and older. *J Am Geriatr Soc*. 2010;58(2):292-299.
38. Hwang J-S, Chin L-S, Chen J-F, et al. The effects of intravenous zoledronic acid in Chinese women with postmenopausal osteoporosis. *Journal of bone and mineral metabolism*. 2011;29(3):328-333.

39. Bubbear JS, Gall A, Middleton FRI, Ferguson-Pell M, Swaminathan R, Keen RW. Early treatment with zoledronic acid prevents bone loss at the hip following acute spinal cord injury. *Osteoporosis international : a journal established as result of cooperation between the European Foundation for Osteoporosis and the National Osteoporosis Foundation of the USA*. 2011;22(1):271-279.
40. Saag K, Lindsay R, Kriegman A, Beamer E, Zhou W. A single zoledronic acid infusion reduces bone resorption markers more rapidly than weekly oral alendronate in postmenopausal women with low bone mineral density. *Bone*. 2007;40(5):1238-1243.
41. Chesnut CH, McClung MR, Ensrud KE, et al. Alendronate treatment of the postmenopausal osteoporotic woman: effect of multiple dosages on bone mass and bone remodeling. *The American journal of medicine*. 1995;99(2):144-152.
42. Kanis JA, Devogelaer JP, Gennari C. Practical guide for the use of bone mineral measurements in the assessment of treatment of osteoporosis: a position paper of the European foundation for osteoporosis and bone disease. The Scientific Advisory Board and the Board of National Societies. *Osteoporosis international : a journal established as result of cooperation between the European Foundation for Osteoporosis and the National Osteoporosis Foundation of the USA*. 1996;6(3):256-261.
43. Shiraki M, Kushida K, Fukunaga M, et al. A placebo-controlled, single-blind study to determine the appropriate alendronate dosage in postmenopausal Japanese patients with osteoporosis. The Alendronate Research Group. *Endocr J*. 1998;45(2):191-201.
44. McClung M, Clemmesen B, Daifotis A, et al. Alendronate prevents postmenopausal bone loss in women without osteoporosis. A double-blind, randomized, controlled trial. Alendronate Osteoporosis Prevention Study Group. *Annals of internal medicine*. 1998;128(4):253-261.
45. Greenspan SL, Parker RA, Ferguson L, Rosen HN, Maitland-Ramsey L, Karpf DB. Early changes in biochemical markers of bone turnover predict the long-term response to alendronate therapy in representative elderly women: a randomized clinical trial. *Journal of bone and mineral research : the official journal of the American Society for Bone and Mineral Research*. 1998;13(9):1431-1438.
46. Lau EM, Woo J, Chan YH, Griffith J. Alendronate prevents bone loss in Chinese women with osteoporosis. *Bone*. 2000;27(5):677-680.
47. Bell NH, Bilezikian JP, Bone HG, Kaur A, Maragoto A, Santora AC. Alendronate increases bone mass and reduces bone markers in postmenopausal African-American women. *The Journal of clinical endocrinology and metabolism*. 2002;87(6):2792-2797.
48. Chailurkit L-o, Jongjaroenprasert W, Rungbunnapun S, Ongphiphadhanakul B, Sae-tung S, Rajatanavin R. Effect of alendronate on bone mineral density and bone turnover in Thai postmenopausal osteoporosis. *Journal of bone and mineral metabolism*. 2003;21(6):421-427.
49. Lyles KW, Colón-Emeric CS, Magaziner JS, et al. Zoledronic acid and clinical fractures and mortality after hip fracture. *The New England journal of medicine*. 2007;357(18):1799-1809.
50. Bekker PJ, Holloway DL, Rasmussen AS, et al. A single-dose placebo-controlled study of AMG 162, a fully human monoclonal antibody to RANKL, in postmenopausal women. *Journal of bone and mineral research : the official journal of the American Society for Bone and Mineral Research*. 2004;19(7):1059-1066.
51. Kumagai Y, Hasunuma T, Padhi D. A randomized, double-blind, placebo-controlled, single-dose study to evaluate the safety, tolerability, pharmacokinetics and pharmacodynamics of denosumab administered subcutaneously to postmenopausal Japanese women. *Bone*. 2011;49(5):1101-1107.
52. Smith MR, Egerdie B, Hernández Toriz N, et al. Denosumab in men receiving androgen-deprivation therapy for prostate cancer. *The New England journal of medicine*. 2009;361(8):745-755.
53. Orwoll E, Teglbjærg CS, Langdahl BL, et al. A randomized, placebo-controlled study of the effects of denosumab for the treatment of men with low bone mineral density. *The Journal of clinical endocrinology and metabolism*. 2012;97(9):3161-3169.
54. Brown JP, Prince RL, Deal C, et al. Comparison of the effect of denosumab and alendronate on BMD and biochemical markers of bone turnover in postmenopausal women with low bone mass: a randomized, blinded, phase 3 trial. *Journal of bone and mineral research : the official journal of the American Society for Bone and Mineral Research*. 2009;24(1):153-161.
55. Beck TJ, Lewiecki EM, Miller PD, et al. Effects of denosumab on the geometry of the proximal femur in postmenopausal women in comparison with alendronate. *J Clin Densitom*. 2008;11(3):351-359.
56. Zebaze RM, Libanati C, Austin M, et al. Differing effects of denosumab and alendronate on cortical and trabecular bone. *Bone*. 2014;59:173-179.
57. Roux C, Hofbauer LC, Ho PR, et al. Denosumab compared with risedronate in postmenopausal women suboptimally adherent to alendronate therapy: Efficacy and safety results from a randomized open-label study. *Bone*. 2014;58:48-54.
58. Brown JP, Roux C, Ho PR, et al. Denosumab significantly increases bone mineral density and reduces bone turnover compared with monthly oral ibandronate and risedronate in postmenopausal women who remained at higher risk for fracture despite previous suboptimal treatment with an oral bisphosphonate. *Osteoporosis international : a journal established as result of cooperation between the European Foundation for Osteoporosis and the National Osteoporosis Foundation of the USA*. 2014;25(7):1953-1961.
59. Anastasilakis AD, Polyzos SA, Gkiomisi A, Bisbinas I, Gerou S, Makras P. Comparative effect of zoledronic acid versus denosumab on serum sclerostin and dickkopf-1 levels of naive postmenopausal women with low bone mass: a randomized, head-to-head clinical trial. *The Journal of clinical endocrinology and metabolism*. 2013;98(8):3206-3212.
60. Seeman E, Delmas PD, Hanley DA, et al. Microarchitectural deterioration of cortical and trabecular bone: differing effects of denosumab and alendronate. *Journal of bone and mineral research : the official journal of the American Society for Bone and Mineral Research*. 2010;25(8):1886-1894.
61. Chesnut CH, 3rd, Skag A, Christiansen C, et al. Effects of oral ibandronate administered daily or intermittently on fracture risk in postmenopausal osteoporosis. *Journal of bone and mineral research : the official journal of the American Society for Bone and Mineral Research*. 2004;19(8):1241-1249.
62. Anastasilakis AD, Goulis DG, Polyzos SA, et al. Head-to-head comparison of risedronate vs. teriparatide on bone turnover markers in women with postmenopausal osteoporosis: a randomised trial. *International journal of clinical practice*. 2008;62(6):919-924.
63. Miyauchi A, Matsumoto T, Sugimoto T, Tsujimoto M, Warner MR, Nakamura T. Effects of teriparatide on bone mineral density and bone turnover markers in Japanese subjects with osteoporosis at high risk of fracture in a 24-month clinical study: 12-month, randomized, placebo-controlled, double-blind and 12-month open-label phases. *Bone*. 2010;47(3):493 - 502.

64. Kendler DL, Marin F, Zerbinì CAF, et al. Effects of teriparatide and risedronate on new fractures in post-menopausal women with severe osteoporosis (VERO): a multicentre, double-blind, double-dummy, randomised controlled trial. *Lancet (London, England)*. 2018;391(10117):230-240.
65. Geusens P, Marin F, Kendler DL, et al. Effects of Teriparatide Compared with Risedronate on the Risk of Fractures in Subgroups of Postmenopausal Women with Severe Osteoporosis: The VERO Trial. *Journal of bone and mineral research : the official journal of the American Society for Bone and Mineral Research*. 2018;33(5):783-794.
66. Glüer CC, Marin F, Ringe JD, et al. Comparative effects of teriparatide and risedronate in glucocorticoid-induced osteoporosis in men: 18-month results of the EuroGIOPs trial. *Journal of bone and mineral research : the official journal of the American Society for Bone and Mineral Research*. 2013;28(6):1355-1368.
67. Simon JA, Recknor C, Moffett AH, Jr., et al. Impact of denosumab on the peripheral skeleton of postmenopausal women with osteoporosis: bone density, mass, and strength of the radius, and wrist fracture. *Menopause*. 2013;20(2):130-137.
68. Nakamura T, Matsumoto T, Sugimoto T, et al. Clinical Trials Express: fracture risk reduction with denosumab in Japanese postmenopausal women and men with osteoporosis: denosumab fracture intervention randomized placebo controlled trial (DIRECT). *The Journal of clinical endocrinology and metabolism*. 2014;99(7):2599-2607.
69. Malouf-Sierra J, Tarantino U, García-Hernández PA, et al. Effect of Teriparatide or Risedronate in Elderly Patients With a Recent Pertrochanteric Hip Fracture: Final Results of a 78-Week Randomized Clinical Trial. *Journal of bone and mineral research : the official journal of the American Society for Bone and Mineral Research*. 2017;32(5):1040-1051.
70. Walker MD, Cusano NE, Sliney J, Jr., et al. Combination therapy with risedronate and teriparatide in male osteoporosis. *Endocrine*. 2013;44(1):237-246.
71. Aspenberg P, Malouf J, Tarantino U, et al. Effects of Teriparatide Compared with Risedronate on Recovery After Pertrochanteric Hip Fracture: Results of a Randomized, Active-Controlled, Double-Blind Clinical Trial at 26 Weeks. *The Journal of bone and joint surgery American volume*. 2016;98(22):1868-1878.
72. Neer RM, Arnaud CD, Zanchetta JR, et al. Effect of parathyroid hormone (1-34) on fractures and bone mineral density in postmenopausal women with osteoporosis. *The New England journal of medicine*. 2001;344(19):1434-1441.
73. Greenspan SL, Bone HG, Ettinger MP, et al. Effect of recombinant human parathyroid hormone (1-84) on vertebral fracture and bone mineral density in postmenopausal women with osteoporosis: a randomized trial. *Ann Intern Med*. 2007;146(5):326-339.
74. Langdahl BL, Libanati C, Crittenden DB, et al. Romosozumab (sclerostin monoclonal antibody) versus teriparatide in postmenopausal women with osteoporosis transitioning from oral bisphosphonate therapy: a randomised, open-label, phase 3 trial. *Lancet (London, England)*. 2017;390(10102):1585-1594.
75. Saag KG, Petersen J, Brandi ML, et al. Romosozumab or Alendronate for Fracture Prevention in Women with Osteoporosis. *The New England journal of medicine*. 2017;377(15):1417-1427.
76. Cosman F, Crittenden DB, Adachi JD, et al. Romosozumab Treatment in Postmenopausal Women with Osteoporosis. *The New England journal of medicine*. 2016;375(16):1532-1543.
77. Miller PD, Hattersley G, Riis BJ, et al. Effect of Abaloparatide vs Placebo on New Vertebral Fractures in Postmenopausal Women With Osteoporosis: A Randomized Clinical Trial. *Jama*. 2016;316(7):722-733.
78. Cosman F, Miller PD, Williams GC, et al. Eighteen Months of Treatment With Subcutaneous Abaloparatide Followed by 6 Months of Treatment With Alendronate in Postmenopausal Women With Osteoporosis: Results of the ACTIVEExtend Trial. *Mayo Clinic proceedings*. 2017;92(2):200-210.
79. Bone HG, Cosman F, Miller PD, et al. ACTIVEExtend: 24 Months of Alendronate After 18 Months of Abaloparatide or Placebo for Postmenopausal Osteoporosis. *The Journal of clinical endocrinology and metabolism*. 2018;103(8):2949-2957.
80. Liberman UA, Weiss SR, Bröll J, et al. Effect of oral alendronate on bone mineral density and the incidence of fractures in postmenopausal osteoporosis. The Alendronate Phase III Osteoporosis Treatment Study Group. *The New England journal of medicine*. 1995;333(22):1437-1443.
81. Black DM, Schwartz AV, Ensrud KE, et al. Effects of continuing or stopping alendronate after 5 years of treatment: the Fracture Intervention Trial Long-term Extension (FLEX): a randomized trial. *Jama*. 2006;296(24):2927-2938.
82. Harris ST, Watts NB, Genant HK, et al. Effects of risedronate treatment on vertebral and nonvertebral fractures in women with postmenopausal osteoporosis: a randomized controlled trial. Vertebral Efficacy With Risedronate Therapy (VERT) Study Group. *Jama*. 1999;282(14):1344-1352.
83. McClung MR, Geusens P, Miller PD, et al. Effect of risedronate on the risk of hip fracture in elderly women. Hip Intervention Program Study Group. *The New England journal of medicine*. 2001;344(5):333-340.
84. Body JJ, Gaich GA, Scheele WH, et al. A randomized double-blind trial to compare the efficacy of teriparatide [recombinant human parathyroid hormone (1-34)] with alendronate in postmenopausal women with osteoporosis. *The Journal of clinical endocrinology and metabolism*. 2002;87(10):4528-4535.
85. Cummings SR, San Martin J, McClung MR, et al. Denosumab for prevention of fractures in postmenopausal women with osteoporosis. *The New England journal of medicine*. 2009;361(8):756-765.
86. Bone HG, Wagman RB, Brandi ML, et al. 10 years of denosumab treatment in postmenopausal women with osteoporosis: results from the phase 3 randomised FREEDOM trial and open-label extension. *The lancet Diabetes & endocrinology*. 2017;5(7):513-523.
87. Watts NB, Harris ST, Genant HK, et al. Intermittent cyclical etidronate treatment of postmenopausal osteoporosis. *The New England journal of medicine*. 1990;323(2):73-79.
88. Cummings SR, Ensrud K, Delmas PD, et al. Lasofoxifene in postmenopausal women with osteoporosis. *The New England journal of medicine*. 2010;362(8):686-696.
89. Ettinger B, Black DM, Mitlak BH, et al. Reduction of vertebral fracture risk in postmenopausal women with osteoporosis treated with raloxifene: results from a 3-year randomized clinical trial. Multiple Outcomes of Raloxifene Evaluation (MORE) Investigators. *Jama*. 1999;282(7):637-645.
90. Meunier PJ, Roux C, Seeman E, et al. The effects of strontium ranelate on the risk of vertebral fracture in women with postmenopausal osteoporosis. *The New England journal of medicine*. 2004;350(5):459-468.

91. Roux C, Fechtenbaum J, Kolta S, Isaia G, Andia JB, Devogelaer JP. Strontium ranelate reduces the risk of vertebral fracture in young postmenopausal women with severe osteoporosis. *Ann Rheum Dis*. 2008;67(12):1736-1738.
92. Black DM, Delmas PD, Eastell R, et al. Once-yearly zoledronic acid for treatment of postmenopausal osteoporosis. *The New England journal of medicine*. 2007;356(18):1809-1822.
93. Arlot M, Meunier PJ, Boivin G, et al. Differential effects of teriparatide and alendronate on bone remodeling in postmenopausal women assessed by histomorphometric parameters. *Journal of bone and mineral research : the official journal of the American Society for Bone and Mineral Research*. 2005;20(7):1244-1253.
94. Cosman F, Eriksen EF, Recknor C, et al. Effects of intravenous zoledronic acid plus subcutaneous teriparatide [rhPTH(1-34)] in postmenopausal osteoporosis. *Journal of bone and mineral research : the official journal of the American Society for Bone and Mineral Research*. 2011;26(3):503-511.
95. Finkelstein JS, Wyland JJ, Lee H, Neer RM. Effects of teriparatide, alendronate, or both in women with postmenopausal osteoporosis. *The Journal of clinical endocrinology and metabolism*. 2010;95(4):1838-1845.
96. Keaveny TM, Donley DW, Hoffmann PF, Mitlak BH, Glass EV, San Martin JA. Effects of teriparatide and alendronate on vertebral strength as assessed by finite element modeling of QCT scans in women with osteoporosis. *Journal of bone and mineral research : the official journal of the American Society for Bone and Mineral Research*. 2007;22(1):149-157.
97. McClung MR, San Martin J, Miller PD, et al. Opposite bone remodeling effects of teriparatide and alendronate in increasing bone mass. *Archives of internal medicine*. 2005;165(15):1762-1768.
98. Panico A, Lupoli GA, Marciello F, et al. Teriparatide vs. alendronate as a treatment for osteoporosis: changes in biochemical markers of bone turnover, BMD and quality of life. *Medical science monitor : international medical journal of experimental and clinical research*. 2011;17(8):Cr442-448.
99. Reginster JY, Seeman E, De Vernejoul MC, et al. Strontium ranelate reduces the risk of nonvertebral fractures in postmenopausal women with osteoporosis: Treatment of Peripheral Osteoporosis (TROPOS) study. *The Journal of clinical endocrinology and metabolism*. 2005;90(5):2816-2822.
100. Reginster JY, Felsenberg D, Boonen S, et al. Effects of long-term strontium ranelate treatment on the risk of nonvertebral and vertebral fractures in postmenopausal osteoporosis: Results of a five-year, randomized, placebo-controlled trial. *Arthritis and rheumatism*. 2008;58(6):1687-1695.
101. Adami S. Protelos: nonvertebral and hip antifracture efficacy in postmenopausal osteoporosis. *Bone*. 2006;38(2 Suppl 1):23-27.
102. Reginster J, Minne HW, Sorensen OH, et al. Randomized trial of the effects of risedronate on vertebral fractures in women with established postmenopausal osteoporosis. Vertebral Efficacy with Risedronate Therapy (VERT) Study Group. *Osteoporosis international : a journal established as result of cooperation between the European Foundation for Osteoporosis and the National Osteoporosis Foundation of the USA*. 2000;11(1):83-91.
103. Fogelman I, Ribot C, Smith R, Ethgen D, Sod E, Reginster JY. Risedronate reverses bone loss in postmenopausal women with low bone mass: results from a multinational, double-blind, placebo-controlled trial. BMD-MN Study Group. *The Journal of clinical endocrinology and metabolism*. 2000;85(5):1895-1900.
104. Black DM, Cummings SR, Karpf DB, et al. Randomised trial of effect of alendronate on risk of fracture in women with existing vertebral fractures. Fracture Intervention Trial Research Group. *Lancet*. 1996;348(9041):1535-1541.
105. Cummings SR, Black DM, Thompson DE, et al. Effect of alendronate on risk of fracture in women with low bone density but without vertebral fractures: results from the Fracture Intervention Trial. *Jama*. 1998;280(24):2077-2082.
106. Reid IR, Horne AM, Mihov B, et al. Fracture Prevention with Zoledronate in Older Women with Osteopenia. *The New England journal of medicine*. 2018;379(25):2407-2416.
107. Bone HG, Bolognese MA, Yuen CK, et al. Effects of denosumab on bone mineral density and bone turnover in postmenopausal women. *The Journal of clinical endocrinology and metabolism*. 2008;93(6):2149-2157.
108. Bone HG, Bolognese MA, Yuen CK, et al. Effects of denosumab treatment and discontinuation on bone mineral density and bone turnover markers in postmenopausal women with low bone mass. *The Journal of clinical endocrinology and metabolism*. 2011;96(4):972-980.
109. McClung MR, Lewiecki EM, Cohen SB, et al. Denosumab in postmenopausal women with low bone mineral density. *The New England journal of medicine*. 2006;354(8):821-831.
110. Miller PD, Pannacciulli N, Brown JP, et al. Denosumab or Zoledronic Acid in Postmenopausal Women With Osteoporosis Previously Treated With Oral Bisphosphonates. *The Journal of clinical endocrinology and metabolism*. 2016;101(8):3163-3170.
111. Greenspan SL, Perera S, Ferchak MA, Nace DA, Resnick NM. Efficacy and safety of single-dose zoledronic acid for osteoporosis in frail elderly women: a randomized clinical trial. *JAMA internal medicine*. 2015;175(6):913-921.
112. Recknor C, Czerwinski E, Bone HG, et al. Denosumab compared with ibandronate in postmenopausal women previously treated with bisphosphonate therapy: a randomized open-label trial. *Obstetrics and gynecology*. 2013;121(6):1291-1299.
113. Miller PD, Chines AA, Christiansen C, et al. Effects of bazedoxifene on BMD and bone turnover in postmenopausal women: 2-yr results of a randomized, double-blind, placebo-, and active-controlled study. *Journal of bone and mineral research : the official journal of the American Society for Bone and Mineral Research*. 2008;23(4):525-535.
114. McClung MR, Bolognese MA, Sedarati F, Recker RR, Miller PD. Efficacy and safety of monthly oral ibandronate in the prevention of postmenopausal bone loss. *Bone*. 2009;44(3):418-422.
115. Miller PD, Epstein S, Sedarati F, Reginster JY. Once-monthly oral ibandronate compared with weekly oral alendronate in postmenopausal osteoporosis: results from the head-to-head MOTION study. *Current medical research and opinion*. 2008;24(1):207-213.
116. Emkey R, Delmas PD, Bolognese M, et al. Efficacy and tolerability of once-monthly oral ibandronate (150 mg) and once-weekly oral alendronate (70 mg): additional results from the Monthly Oral Therapy With Ibandronate For Osteoporosis Intervention (MOTION) study. *Clinical therapeutics*. 2009;31(4):751-761.

117. Bock O, Börst H, Beller G, et al. Impact of oral ibandronate 150 mg once monthly on bone structure and density in post-menopausal osteoporosis or osteopenia derived from in vivo  $\mu$ CT. *Bone*. 2012;50(1):317-324.
118. Fogelman I, Fordham JN, Fraser WD, et al. Parathyroid hormone(1-84) treatment of postmenopausal women with low bone mass receiving hormone replacement therapy. *Calcified tissue international*. 2008;83(2):85-92.
119. Ensrud KE, Stock JL, Barrett-Connor E, et al. Effects of raloxifene on fracture risk in postmenopausal women: the Raloxifene Use for the Heart Trial. *Journal of bone and mineral research : the official journal of the American Society for Bone and Mineral Research*. 2008;23(1):112-120.
120. Sambrook PN, Geusens P, Ribot C, et al. Alendronate produces greater effects than raloxifene on bone density and bone turnover in postmenopausal women with low bone density: results of EFFECT (Efficacy of FOSAMAX versus EVISTA Comparison Trial) International. *Journal of internal medicine*. 2004;255(4):503-511.
121. Maricic M, Adachi JD, Sarkar S, Wu W, Wong M, Harper KD. Early effects of raloxifene on clinical vertebral fractures at 12 months in postmenopausal women with osteoporosis. *Archives of internal medicine*. 2002;162(10):1140-1143.
122. Recker RR, Kendler D, Recknor CP, et al. Comparative effects of raloxifene and alendronate on fracture outcomes in postmenopausal women with low bone mass. *Bone*. 2007;40(4):843-851.
123. Lufkin EG, Whitaker MD, Nickelsen T, et al. Treatment of established postmenopausal osteoporosis with raloxifene: a randomized trial. *Journal of bone and mineral research : the official journal of the American Society for Bone and Mineral Research*. 1998;13(11):1747-1754.
124. Silverman SL, Christiansen C, Genant HK, et al. Efficacy of bazedoxifene in reducing new vertebral fracture risk in postmenopausal women with osteoporosis: results from a 3-year, randomized, placebo-, and active-controlled clinical trial. *Journal of bone and mineral research : the official journal of the American Society for Bone and Mineral Research*. 2008;23(12):1923-1934.
125. Silverman SL, Chines AA, Kendler DL, et al. Sustained efficacy and safety of bazedoxifene in preventing fractures in postmenopausal women with osteoporosis: results of a 5-year, randomized, placebo-controlled study. *Osteoporosis international : a journal established as result of cooperation between the European Foundation for Osteoporosis and the National Osteoporosis Foundation of the USA*. 2012;23(1):351-363.
126. de Villiers TJ, Chines AA, Palacios S, et al. Safety and tolerability of bazedoxifene in postmenopausal women with osteoporosis: results of a 5-year, randomized, placebo-controlled phase 3 trial. *Osteoporosis international : a journal established as result of cooperation between the European Foundation for Osteoporosis and the National Osteoporosis Foundation of the USA*. 2011;22(2):567-576.
127. Palacios S, Silverman SL, de Villiers TJ, et al. A 7-year randomized, placebo-controlled trial assessing the long-term efficacy and safety of bazedoxifene in postmenopausal women with osteoporosis: effects on bone density and fracture. *Menopause (New York, NY)*. 2015;22(8):806-813.
128. Luckey M, Kagan R, Greenspan S, et al. Once-weekly alendronate 70 mg and raloxifene 60 mg daily in the treatment of postmenopausal osteoporosis. *Menopause (New York, NY)*. 2004;11(4):405-415.
129. Greenspan SL, Schneider DL, McClung MR, et al. Alendronate improves bone mineral density in elderly women with osteoporosis residing in long-term care facilities. A randomized, double-blind, placebo-controlled trial. *Ann Intern Med*. 2002;136(10):742-746.
130. Eastell R, Nickelsen T, Marin F, et al. Sequential treatment of severe postmenopausal osteoporosis after teriparatide: final results of the randomized, controlled European Study of Forsteo (EUROFORS). *Journal of bone and mineral research : the official journal of the American Society for Bone and Mineral Research*. 2009;24(4):726-736.
131. Kendler DL, Roux C, Benhamou CL, et al. Effects of denosumab on bone mineral density and bone turnover in postmenopausal women transitioning from alendronate therapy. *Journal of bone and mineral research : the official journal of the American Society for Bone and Mineral Research*. 2010;25(1):72-81.
132. Freemantle N, Satram-Hoang S, Tang ET, et al. Final results of the DAPS (Denosumab Adherence Preference Satisfaction) study: a 24-month, randomized, crossover comparison with alendronate in postmenopausal women. *Osteoporosis international : a journal established as result of cooperation between the European Foundation for Osteoporosis and the National Osteoporosis Foundation of the USA*. 2012;23(1):317-326.
133. Black DM, Greenspan SL, Ensrud KE, et al. The effects of parathyroid hormone and alendronate alone or in combination in postmenopausal osteoporosis. *The New England journal of medicine*. 2003;349(13):1207-1215.
134. Tucci JR, Tonino RP, Emkey RD, Peverly CA, Kher U, Santora AC, 2nd. Effect of three years of oral alendronate treatment in postmenopausal women with osteoporosis. *The American journal of medicine*. 1996;101(5):488-501.
135. Pols HA, Felsenberg D, Hanley DA, et al. Multinational, placebo-controlled, randomized trial of the effects of alendronate on bone density and fracture risk in postmenopausal women with low bone mass: results of the FOSIT study. Fosamax International Trial Study Group. *Osteoporosis international : a journal established as result of cooperation between the European Foundation for Osteoporosis and the National Osteoporosis Foundation of the USA*. 1999;9(5):461-468.
136. Meunier PJ, Slosman DO, Delmas PD, et al. Strontium ranelate: dose-dependent effects in established postmenopausal vertebral osteoporosis--a 2-year randomized placebo controlled trial. *The Journal of clinical endocrinology and metabolism*. 2002;87(5):2060-2066.
137. Bone HG, Downs RW, Jr., Tucci JR, et al. Dose-response relationships for alendronate treatment in osteoporotic elderly women. Alendronate Elderly Osteoporosis Study Centers. *The Journal of clinical endocrinology and metabolism*. 1997;82(1):265-274.
138. McClung M, Miller P, Recknor C, Mesenbrink P, Bucci-Rechtweg C, Benhamou CL. Zoledronic acid for the prevention of bone loss in postmenopausal women with low bone mass: a randomized controlled trial. *Obstet Gynecol*. 2009;114(5):999-1007.
139. McClung MR, Siris E, Cummings S, et al. Prevention of bone loss in postmenopausal women treated with lasofoxifene compared with raloxifene. *Menopause*. 2006;13(3):377-386.

140. Meunier PJ, Roux C, Ortolani S, et al. Effects of long-term strontium ranelate treatment on vertebral fracture risk in postmenopausal women with osteoporosis. *Osteoporosis international : a journal established as result of cooperation between the European Foundation for Osteoporosis and the National Osteoporosis Foundation of the USA*. 2009;20(10):1663-1673.
141. Rosen CJ, Hochberg MC, Bonnick SL, et al. Treatment with once-weekly alendronate 70 mg compared with once-weekly risedronate 35 mg in women with postmenopausal osteoporosis: a randomized double-blind study. *Journal of bone and mineral research : the official journal of the American Society for Bone and Mineral Research*. 2005;20(1):141-151.
142. Välimäki MJ, Farrerons-Minguella J, Halse J, et al. Effects of risedronate 5 mg/d on bone mineral density and bone turnover markers in late-postmenopausal women with osteopenia: a multinational, 24-month, randomized, double-blind, placebo-controlled, parallel-group, phase III trial. *Clinical therapeutics*. 2007;29(9):1937-1949.
143. Sethi BK, Chadha M, Modi KD, Kumar KM, Mehrotra R, Sriram U. Efficacy of teriparatide in increasing bone mineral density in postmenopausal women with osteoporosis--an Indian experience. *The Journal of the Association of Physicians of India*. 2008;56:418-424.
144. Miyauchi A, Matsumoto T, Shigeta H, Tsujimoto M, Thiebaud D, Nakamura T. Effect of teriparatide on bone mineral density and biochemical markers in Japanese women with postmenopausal osteoporosis: a 6-month dose-response study. *Journal of bone and mineral metabolism*. 2008;26(6):624-634.
145. Cosman F, Lane NE, Bolognese MA, et al. Effect of transdermal teriparatide administration on bone mineral density in postmenopausal women. *The Journal of clinical endocrinology and metabolism*. 2010;95(1):151-158.
146. Cosman F, Nieves J, Woelfert L, et al. Parathyroid hormone added to established hormone therapy: effects on vertebral fracture and maintenance of bone mass after parathyroid hormone withdrawal. *Journal of bone and mineral research : the official journal of the American Society for Bone and Mineral Research*. 2001;16(5):925-931.
147. Ste-Marie LG, Schwartz SL, Hossain A, Desai D, Gaich GA. Effect of teriparatide [rhPTH(1-34)] on BMD when given to postmenopausal women receiving hormone replacement therapy. *Journal of bone and mineral research : the official journal of the American Society for Bone and Mineral Research*. 2006;21(2):283-291.
148. Cosman F, Nieves J, Zion M, Woelfert L, Luckey M, Lindsay R. Daily and cyclic parathyroid hormone in women receiving alendronate. *The New England journal of medicine*. 2005;353(6):566-575.
149. Tsai JN, Uihlein AV, Lee H, et al. Teriparatide and denosumab, alone or combined, in women with postmenopausal osteoporosis: the DATA study randomised trial. *Lancet (London, England)*. 2013;382(9886):50-56.
150. Leder BZ, Tsai JN, Uihlein AV, et al. Two years of Denosumab and teriparatide administration in postmenopausal women with osteoporosis (The DATA Extension Study): a randomized controlled trial. *The Journal of clinical endocrinology and metabolism*. 2014;99(5):1694-1700.
151. Anastasilakis AD, Goulis DG, Polyzos SA, et al. Serum osteoprotegerin and RANKL are not specifically altered in women with postmenopausal osteoporosis treated with teriparatide or risedronate: a randomized, controlled trial. *Hormone and metabolic research = Hormon- und Stoffwechselforschung = Hormones et metabolisme*. 2008;40(4):281-285.
152. Ishibashi H, Crittenden DB, Miyauchi A, et al. Romosozumab increases bone mineral density in postmenopausal Japanese women with osteoporosis: A phase 2 study. *Bone*. 2017;103:209-215.
153. Leder BZ, O'Dea LS, Zanchetta JR, et al. Effects of abaloparatide, a human parathyroid hormone-related peptide analog, on bone mineral density in postmenopausal women with osteoporosis. *The Journal of clinical endocrinology and metabolism*. 2015;100(2):697-706.
154. McClung MR, Grauer A, Boonen S, et al. Romosozumab in postmenopausal women with low bone mineral density. *The New England journal of medicine*. 2014;370(5):412-420.
155. Alexandersen P, Riis BJ, Christiansen C. Monofluorophosphate combined with hormone replacement therapy induces a synergistic effect on bone mass by dissociating bone formation and resorption in postmenopausal women: a randomized study. *The Journal of clinical endocrinology and metabolism*. 1999;84(9):3013-3020.
156. Bai H, Jing D, Guo A, Yin S. Randomized controlled trial of zoledronic acid for treatment of osteoporosis in women. *The Journal of international medical research*. 2013;41(3):697-704.
157. Blair JM, Dai KR, Chen DC, et al. Comparison of the effects of teriparatide and calcitonin in the treatment of postmenopausal Chinese women with osteoporosis. *Bone*. 2009;44(suppl-S1):S74-S74.
158. Effects of hormone therapy on bone mineral density: results from the postmenopausal estrogen/progestin interventions (PEPI) trial. The Writing Group for the PEPI. *Jama*. 1996;276(17):1389-1396.
159. Cauley JA, Robbins J, Chen Z, et al. Effects of estrogen plus progestin on risk of fracture and bone mineral density: the Women's Health Initiative randomized trial. *Jama*. 2003;290(13):1729-1738.
160. Chesnut CH, 3rd, Silverman S, Andriano K, et al. A randomized trial of nasal spray salmon calcitonin in postmenopausal women with established osteoporosis: the prevent recurrence of osteoporotic fractures study. PROOF Study Group. *The American journal of medicine*. 2000;109(4):267-276.
161. Clemmesen B, Ravn P, Zegels B, Taquet AN, Christiansen C, Reginster JY. A 2-year phase II study with 1-year of follow-up of risedronate (NE-58095) in postmenopausal osteoporosis. *Osteoporosis international : a journal established as result of cooperation between the European Foundation for Osteoporosis and the National Osteoporosis Foundation of the USA*. 1997;7(5):488-495.
162. Cosman F, Wermers RA, Recknor C, et al. Effects of teriparatide in postmenopausal women with osteoporosis on prior alendronate or raloxifene: differences between stopping and continuing the antiresorptive agent. *The Journal of clinical endocrinology and metabolism*. 2009;94(10):3772-3780.
163. Cummings SR, Ettinger B, Delmas PD, et al. The effects of tibolone in older postmenopausal women. *The New England journal of medicine*. 2008;359(7):697-708.
164. Dursun N, Dursun E, Yalçın S. Comparison of alendronate, calcitonin and calcium treatments in postmenopausal osteoporosis. *International journal of clinical practice*. 2001;55(8):505-509.
165. Gallagher JC, Fowler SE, Detter JR, Sherman SS. Combination treatment with estrogen and calcitriol in the prevention of age-related bone loss. *The Journal of clinical endocrinology and metabolism*. 2001;86(8):3618-3628.
166. Gennari C CS, Bigazzi S, Fusi S, Gonnelli S, Ferrara R, Zacchei F Comparative effects on bone mineral content of calcium and calcium plus salmon calcitonin given in two different regimens in postmenopausal osteoporosis. *Current Therapeutic Research: Clinical and Experimental*. 1985;38:455-464.
167. Greenspan SL, Parker RA, Ferguson L, Rosen HN, Maitland-Ramsey L, Karpf DB. Early changes in biochemical markers of bone turnover predict the long-term response to alendronate therapy in representative elderly women: a randomized clinical trial. *Journal of bone and mineral research : the official journal of the American Society for Bone and Mineral Research*. 1998;13(9):1431-1438.



168. Grey A, Bolland MJ, Wattie D, Horne A, Gamble G, Reid IR. The antiresorptive effects of a single dose of zoledronate persist for two years: a randomized, placebo-controlled trial in osteopenic postmenopausal women. *The Journal of clinical endocrinology and metabolism*. 2009;94(2):538-544.
169. Grey A, Bolland M, Mihov B, et al. Duration of antiresorptive effects of low-dose zoledronate in osteopenic postmenopausal women: a randomized, placebo-controlled trial. *Journal of bone and mineral research : the official journal of the American Society for Bone and Mineral Research*. 2014;29(1):166-172.
170. Gruber HE, Ivey JL, Baylink DJ, et al. Long-term calcitonin therapy in postmenopausal osteoporosis. *Metabolism: clinical and experimental*. 1984;33(4):295-303.
171. Henriksen K, Byrjalsen I, Andersen JR, et al. A randomized, double-blind, multicenter, placebo-controlled study to evaluate the efficacy and safety of oral salmon calcitonin in the treatment of osteoporosis in postmenopausal women taking calcium and vitamin D. *Bone*. 2016;91:122-129.
172. Hizmetli S, Elden H, Kaptanoglu E, Nacitarhan V, Kocagil S. The effect of different doses of calcitonin on bone mineral density and fracture risk in postmenopausal osteoporosis. *International journal of clinical practice*. 1998;52(7):453-455.
173. Hooper MJ, Ebeling PR, Roberts AP, et al. Risedronate prevents bone loss in early postmenopausal women: A prospective randomized, placebo-controlled trial. *Climacteric*. 2005;8(3):251-262.
174. Hulley S, Grady D, Bush T, et al. Randomized trial of estrogen plus progestin for secondary prevention of coronary heart disease in postmenopausal women. Heart and Estrogen/progestin Replacement Study (HERS) Research Group. *Jama*. 1998;280(7):605-613.
175. Ishida Y, Kawai S. Comparative efficacy of hormone replacement therapy, etidronate, calcitonin, alfacalcidol, and vitamin K in postmenopausal women with osteoporosis: The Yamaguchi Osteoporosis Prevention Study. *The American journal of medicine*. 2004;117(8):549-555.
176. Itabashi A, Yoh K, Chines AA, et al. Effects of bazedoxifene on bone mineral density, bone turnover, and safety in postmenopausal Japanese women with osteoporosis. *Journal of bone and mineral research : the official journal of the American Society for Bone and Mineral Research*. 2011;26(3):519-529.
177. Iwamoto J, Sato Y, Uzawa M, Takeda T, Matsumoto H. Comparison of effects of alendronate and raloxifene on lumbar bone mineral density, bone turnover, and lipid metabolism in elderly women with osteoporosis. *Yonsei medical journal*. 2008;49(1):119-128.
178. Iwamoto J, Makita K, Sato Y, Takeda T, Matsumoto H. Alendronate is more effective than calcitonin in improving pain and quality of life in postmenopausal women with osteoporosis. *Osteoporosis international : a journal established as result of cooperation between the European Foundation for Osteoporosis and the National Osteoporosis Foundation of the USA*. 2011;22(10):2735-2742.
179. Jacobsen DE, Melis RJ, Verhaar HJ, Olde Rikkert MG. Raloxifene and tibolone in elderly women: a randomized, double-blind, double-dummy, placebo-controlled trial. *Journal of the American Medical Association*. 2012;313(2):189.e181-187.
180. Koh JM, Chung DJ, Chung YS, et al. Assessment of Denosumab in Korean Postmenopausal Women with Osteoporosis: Randomized, Double-Blind, Placebo-Controlled Trial with Open-Label Extension. *Yonsei Med J*. 2016;57(4):905-914.
181. Komulainen MH, Kröger H, Tuppurainen MT, et al. HRT and Vit D in prevention of non-vertebral fractures in postmenopausal women; a 5 year randomized trial. *Maturitas*. 1998;31(1):45-54.
182. Lees B, Stevenson JC. The prevention of osteoporosis using sequential low-dose hormone replacement therapy with estradiol-17 beta and dydrogesterone. *Osteoporosis international : a journal established as result of cooperation between the European Foundation for Osteoporosis and the National Osteoporosis Foundation of the USA*. 2001;12(4):251-258.
183. Lindsay R, Tohme JF. Estrogen treatment of patients with established postmenopausal osteoporosis. *Obstetrics and gynecology*. 1990;76(2):290-295.
184. Lufkin EG, Wahner HW, O'Fallon WM, et al. Treatment of postmenopausal osteoporosis with transdermal estrogen. *Ann Intern Med*. 1992;117(1):1-9.
185. McClung MR, Wasnich RD, Hosking DJ, et al. Prevention of postmenopausal bone loss: six-year results from the Early Postmenopausal Intervention Cohort Study. *The Journal of clinical endocrinology and metabolism*. 2004;89(10):4879-4885.
186. Morii H, Ohashi Y, Taketani Y, et al. Effect of raloxifene on bone mineral density and biochemical markers of bone turnover in Japanese postmenopausal women with osteoporosis: results from a randomized placebo-controlled trial. *Osteoporosis international : a journal established as result of cooperation between the European Foundation for Osteoporosis and the National Osteoporosis Foundation of the USA*. 2003;14(10):793-800.
187. Mortensen L, Charles P, Bekker PJ, Digennaro J, Johnston CC, Jr. Risedronate increases bone mass in an early postmenopausal population: two years of treatment plus one year of follow-up. *The Journal of clinical endocrinology and metabolism*. 1998;83(2):396-402.
188. Mosekilde L, Beck-Nielsen H, Sørensen OH, et al. Hormonal replacement therapy reduces forearm fracture incidence in recent postmenopausal women - results of the Danish Osteoporosis Prevention Study. *Maturitas*. 2000;36(3):181-193.
189. Muscoso E, Puglisi N, Mamazza C, et al. Antiresorption therapy and reduction in fracture susceptibility in the osteoporotic elderly patient: open study. *European review for medical and pharmacological sciences*. 2004;8(2):97-102.
190. Nachtigall LE, Nachtigall RH, Nachtigall RD, Beckman EM. Estrogen replacement therapy I: a 10-year prospective study in the relationship to osteoporosis. *Obstetrics and gynecology*. 1979;53(3):277-281.
191. Nakamura T, Matsumoto T, Sugimoto T, Shiraki M. Dose-response study of denosumab on bone mineral density and bone turnover markers in Japanese postmenopausal women with osteoporosis. *Osteoporosis international : a journal established as result of cooperation between the European Foundation for Osteoporosis and the National Osteoporosis Foundation of the USA*. 2012;23(3):1131-1140.
192. Nakamura T, Sugimoto T, Nakano T, et al. Randomized Teriparatide [human parathyroid hormone (PTH) 1-34] Once-Weekly Efficacy Research (TOWER) trial for examining the reduction in new vertebral fractures in subjects with primary osteoporosis and high fracture risk. *The Journal of clinical endocrinology and metabolism*. 2012;97(9):3097-3106.
193. Overgaard K, Hansen MA, Jensen SB, Christiansen C. Effect of salmon calcitonin given intranasally on bone mass and fracture rates in established osteoporosis: a dose-response study. *Bmj*. 1992;305(6853):556-561.

194. Recker RR, Davies KM, Dowd RM, Heaney RP. The effect of low-dose continuous estrogen and progesterone therapy with calcium and vitamin D on bone in elderly women. A randomized, controlled trial. *Ann Intern Med.* 1999;130(11):897-904.
195. Recker R, Stakkestad JA, Chesnut CH, 3rd, et al. Insufficiently dosed intravenous ibandronate injections are associated with suboptimal antifracture efficacy in postmenopausal osteoporosis. *Bone.* 2004;34(5):890-899.
196. Reid IR, Brown JP, Burckhardt P, et al. Intravenous zoledronic acid in postmenopausal women with low bone mineral density. *The New England journal of medicine.* 2002;346(9):653-661.
197. Reid IR, Eastell R, Fogelman I, et al. A comparison of the effects of raloxifene and conjugated equine estrogen on bone and lipids in healthy postmenopausal women. *Archives of internal medicine.* 2004;164(8):871-879.
198. Rico H, Revilla M, Hernández ER, Villa LF, Alvarez de Buergo M. Total and regional bone mineral content and fracture rate in postmenopausal osteoporosis treated with salmon calcitonin: a prospective study. *Calcif Tissue Int.* 1995;56(3):181-185.
199. Rogers A, Glover SJ, Eastell R. A randomised, double-blinded, placebo-controlled, trial to determine the individual response in bone turnover markers to lasofoxifene therapy. *Bone.* 2009;45(6):1044-1052.
200. Tankó LB, Bagger YZ, Alexandersen P, et al. Safety and efficacy of a novel salmon calcitonin (sCT) technology-based oral formulation in healthy postmenopausal women: acute and 3-month effects on biomarkers of bone turnover. *Journal of bone and mineral research : the official journal of the American Society for Bone and Mineral Research.* 2004;19(9):1531-1538.
201. Tierney MC, Oh P, Moineddin R, et al. A randomized double-blind trial of the effects of hormone therapy on delayed verbal recall in older women. *Psychoneuroendocrinology.* 2009;34(7):1065-1074.
202. Ushiroyama T, Ikeda A, Sakai M, Higashiyama T, Ueki M. Effects of the combined use of calcitonin and 1 alpha-hydroxycholecalciferol on vertebral bone loss and bone turnover in women with postmenopausal osteopenia and osteoporosis: a prospective study of long-term and continuous administration with low dose calcitonin. *Maturitas.* 2001;40(3):229-238.
203. Vickers MR, MacLennan AH, Lawton B, et al. Main morbidities recorded in the women's international study of long duration oestrogen after menopause (WISDOM): a randomised controlled trial of hormone replacement therapy in postmenopausal women. *BMJ (Clinical research ed).* 2007;335(7613):239.
204. Weiss SR, Ellman H, Dolker M. A randomized controlled trial of four doses of transdermal estradiol for preventing postmenopausal bone loss. Transdermal Estradiol Investigator Group. *Obstetrics and gynecology.* 1999;94(3):330-336.
205. Wimalawansa SJ. A four-year randomized controlled trial of hormone replacement and bisphosphonate, alone or in combination, in women with postmenopausal osteoporosis. *The American journal of medicine.* 1998;104(3):219-226.
206. Yan Y, Wang W, Zhu H, et al. The efficacy and tolerability of once-weekly alendronate 70 mg on bone mineral density and bone turnover markers in postmenopausal Chinese women with osteoporosis. *Journal of bone and mineral metabolism.* 2009;27(4):471-478.
207. Emkey R, Koltun W, Beusterien K, et al. Patient preference for once-monthly ibandronate versus once-weekly alendronate in a randomized, open-label, cross-over trial: the Boniva Alendronate Trial in Osteoporosis (BALTO). *Current medical research and opinion.* 2005;21(12):1895-1903.
208. Cooper A, Drake J, Brankin E. Treatment persistence with once-monthly ibandronate and patient support vs. once-weekly alendronate: Results from the PERSIST study. *International journal of clinical practice.* 2006;60(8):896-905.
209. Yang Y, Luo X, Yan F, et al. Effect of zoledronic acid on vertebral marrow adiposity in postmenopausal osteoporosis assessed by MR spectroscopy. *Skeletal Radiol.* 2015;44(10):1499-1505.
210. Eastell R, Nagase S, Small M, et al. Effect of ONO-5334 on bone mineral density and biochemical markers of bone turnover in postmenopausal osteoporosis: 2-year results from the OCEAN study. *Journal of bone and mineral research : the official journal of the American Society for Bone and Mineral Research.* 2014;29(2):458-466.
211. Abboskhujieva LS, Ismailov SI, Alikhanova NM. Efficacy of strontium ranelate in combination with a D-hormone analog for the treatment of postmenopausal osteoporosis. *Drugs R D.* 2014;14(4):315-324.
212. Hwang JS, Chen JF, Yang TS, et al. The effects of strontium ranelate in Asian women with postmenopausal osteoporosis. *Calcified Tissue International.* 2008;83(5):308-314.
213. Ilter E, Karalok H, Tufekci EC, Batur O. Efficacy and acceptability of risedronate 5 mg daily compared with 35 mg once weekly for the treatment of postmenopausal osteoporosis. *Climacteric : the journal of the International Menopause Society.* 2006;9(2):129-134.
214. Epstein S, Delmas PD, Emkey R, Wilson KM, Hiltbrunner V, Schimmer RC. Oral ibandronate in the management of postmenopausal osteoporosis: review of upper gastrointestinal safety. *Maturitas.* 2006;54(1).
215. Leung JYY, Ho AYY, Ip TP, Lee G, Kung AWC. The efficacy and tolerability of risedronate on bone mineral density and bone turnover markers in osteoporotic Chinese women: a randomized placebo-controlled study. *Bone.* 2005;36(2):358-364.
216. Hosking D, Adami S, Felsenberg D, et al. Comparison of change in bone resorption and bone mineral density with once-weekly alendronate and daily risedronate: a randomised, placebo-controlled study. *Current medical research and opinion.* 2003;19(5):383-394.
217. Kung AW, Yeung SS, Chu LW. The efficacy and tolerability of alendronate in postmenopausal osteoporotic Chinese women: a randomized placebo-controlled study. *Calcified tissue international.* 2000;67(4):286-290.
218. Stěpán JJ, Vokrouhlická J. Comparison of biochemical markers of bone remodelling in the assessment of the effects of alendronate on bone in postmenopausal osteoporosis. *Clinica chimica acta; international journal of clinical chemistry.* 1999;288(1 - 2):121 - 135.
219. Felsenberg D, Alenfeld F, Bock O, Hammermeister C, Gowan W. Placebo-controlled multicenter study of oral alendronate in postmenopausal osteoporotic women. FOSIT-Study-Group. Fosamax International Trial. *Maturitas.* 1998;31(1):35-44.



220. Anastasilakis AD, Polyzos SA, Gkiomisi A, et al. Denosumab versus zoledronic acid in patients previously treated with zoledronic acid. *Osteoporosis international : a journal established as result of cooperation between the European Foundation for Osteoporosis and the National Osteoporosis Foundation of the USA*. 2015;26(10):2521-2527.
221. Kendler DL, McClung MR, Freemantle N, et al. Adherence, preference, and satisfaction of postmenopausal women taking denosumab or alendronate. *Osteoporosis international : a journal established as result of cooperation between the European Foundation for Osteoporosis and the National Osteoporosis Foundation of the USA*. 2011;22(6):1725-1735.
222. Niimi R, Kono T, Nishihara A, Hasegawa M, Kono T, Sudo A. Efficacy of Switching From Teriparatide to Bisphosphonate or Denosumab: A Prospective, Randomized, Open-Label Trial. *JBMR Plus*. 2018;2(5):289-294.
223. Saag KG, Petersen J, Brandi ML, et al. Romosozumab or alendronate for fracture prevention in women with osteoporosis. *New England Journal of Medicine*. 2017;377(15):1417-1427.
224. Miller PD, Hattersley G, Riis BJ, et al. Effect of abaloparatide vs placebo on new vertebral fractures in postmenopausal women with osteoporosis a randomized clinical trial. *JAMA - Journal of the American Medical Association*. 2016;316(7):722-733.
225. Langdahl BL, Libanati C, Crittenden DB, et al. Romosozumab (sclerostin monoclonal antibody) versus teriparatide in postmenopausal women with osteoporosis transitioning from oral bisphosphonate therapy: a randomised, open-label, phase 3 trial. *The Lancet*. 2017;390(10102):1585-1594.
226. Kendler DL, Marin F, Zerbini CAF, et al. Effects of teriparatide and risedronate on new fractures in post-menopausal women with severe osteoporosis (VERO): a multicentre, double-blind, double-dummy, randomised controlled trial. *The Lancet*. 2018;391(10117):230-240.
227. Meunier PJ, Roux C, Seeman E, et al. The Effects of Strontium Ranelate on the Risk of Vertebral Fracture in Women with Postmenopausal Osteoporosis. *New England Journal of Medicine*. 2004;350(5):459-468.
228. Reginster JY, Felsenberg D, Boonen S, et al. Effects of long-term strontium ranelate treatment on the risk of nonvertebral and vertebral fractures in postmenopausal osteoporosis: Results of a five-year, randomized, placebo-controlled trial. *Arthritis and Rheumatism*. 2008;58(6):1687-1695.
229. Hadji P, Zanchetta JR, Russo L, et al. The effect of teriparatide compared with risedronate on reduction of back pain in postmenopausal women with osteoporotic vertebral fractures. *Osteoporosis International*. 2012;23(8):2141-2150.
230. Reginster JY, Minne HW, Sorensen OH, et al. Randomized trial of the effects of risedronate on vertebral fractures in women with established postmenopausal osteoporosis. *Osteoporosis International*. 2000;11(1):83-91.
231. Fogelman I, Ribot C, Smith R, Ethgen D, Sod E, Reginster JY. Risedronate reverses bone loss in postmenopausal women with low bone mass: Results from a multinational, double-blind, placebo-controlled trial. *Journal of Clinical Endocrinology and Metabolism*. 2000;85(5):1895-1900.
232. Anastasilakis AD, Goulis DG, Polyzos SA, et al. Head-to-head comparison of risedronate vs. teriparatide on bone turnover markers in women with postmenopausal osteoporosis: A randomised trial. *International journal of clinical practice*. 2008;62(6):919-924.
233. Cosman F, Eriksen EF, Recknor C, et al. Effects of intravenous zoledronic acid plus subcutaneous teriparatide [rhPTH(1-34)] in postmenopausal osteoporosis. *Journal of Bone and Mineral Research*. 2011;26(3):503-511.
234. Neer RM, Arnaud CD, Zanchetta JR, et al. Effect of parathyroid hormone (1-34) on fractures and bone mineral density in postmenopausal women with osteoporosis. *New England Journal of Medicine*. 2001;344(19):1434-1441.
235. Black DM, Schwartz AV, Ensrud KE, et al. Effects of continuing or stopping alendronate after 5 years of treatment: The Fracture Intervention Trial long-term extension (FLEX): A randomized trial. *Journal of the American Medical Association*. 2006;296(24):2927-2938.
236. McClung MR, Michael Lewiecki E, Cohen SB, et al. Denosumab in postmenopausal women with low bone mineral density. *New England Journal of Medicine*. 2006;354(8):821-831.
237. Harris ST, Watts NB, Genant HK, et al. Effects of risedronate treatment on vertebral and nonvertebral fractures in women with postmenopausal osteoporosis: A randomized controlled trial. *Journal of the American Medical Association*. 1999;282(14):1344-1352.
238. Black DM, Delmas PD, Eastell R, et al. Once-yearly zoledronic acid for treatment of postmenopausal osteoporosis. *New England Journal of Medicine*. 2007;356(18):1809-1822.
239. Brown JP, Prince RL, Deal C, et al. Comparison of the effect of denosumab and alendronate on BMD and biochemical markers of bone turnover in postmenopausal women with low bone mass: a randomized, blinded, phase 3 trial. *Journal of bone and mineral research : the official journal of the American Society for Bone and Mineral Research*. 2009;24(1):153-161.
240. Greenspan SL, Perera S, Ferchak MA, Nace DA, Resnick NM. Efficacy and safety of single-dose zoledronic acid for osteoporosis in frail elderly women: a randomized clinical trial. *JAMA internal medicine*. 2015;175(6):913 - 921.
241. Boonen S, Orwoll E, Magaziner J, et al. Once-yearly zoledronic acid in older men compared with women with recent hip fracture. *Journal of the American Geriatrics Society*. 2011;59(11):2084 - 2090.
242. Hwang JS, Chin LS, Chen JF, et al. The effects of intravenous zoledronic acid in Chinese women with postmenopausal osteoporosis. *J Bone Miner Metab*. 2011;29(3):328-333.
243. Recknor C, Czerwinski E, Bone HG, et al. Denosumab compared with ibandronate in postmenopausal women previously treated with bisphosphonate therapy: a randomized open-label trial. *Obstetrics and gynecology*. 2013;121(6):1291 - 1299.
244. Miller PD, Epstein S, Sedarati F, Reginster JY. Once-monthly oral ibandronate compared with weekly oral alendronate in postmenopausal osteoporosis: Results from the head-to-head MOTION study. *Current Medical Research and Opinion*. 2008;24(1):207-213.
245. Bock O, Börst H, Beller G, et al. Impact of oral ibandronate 150mg once monthly on bone structure and density in post-menopausal osteoporosis or osteopenia derived from in vivo  $\mu$ CT. *Bone*. 2012;50(1):317-324.

246. Fogelman I, Fordham JN, Fraser WD, et al. Parathyroid hormone(1-84) treatment of postmenopausal women with low bone mass receiving hormone replacement therapy. *Calcified Tissue International*. 2008;83(2):85-92.
247. Sambrook PN, Geusens P, Ribot C, et al. Alendronate produces greater effects than raloxifene on bone density and bone turnover in postmenopausal women with low bone density: Results of EFFECT (Efficacy of FOSAMAX® versus EVISTA® Comparison Trial) International. *Journal of Internal Medicine*. 2004;255(4):503-511.
248. Lufkin EG, Whitaker MD, Nickelsen T, et al. Treatment of established postmenopausal osteoporosis with raloxifene: A randomized trial. *Journal of Bone and Mineral Research*. 1998;13(11):1747-1754.
249. Luckey M, Kagan R, Greenspan S, et al. Once-weekly alendronate 70 mg and raloxifene 60 mg daily in the treatment of postmenopausal osteoporosis. *Menopause*. 2004;11(4):405-415.
250. Kendler DL, Roux C, Benhamou CL, et al. Effects of denosumab on bone mineral density and bone turnover in postmenopausal women transitioning from alendronate therapy. *Journal of Bone and Mineral Research*. 2010;25(1):72-81.
251. Tucci JR, Tonino RP, Emkey RD, Pevery CA, Kher U, Santora AC. Effect of three years of oral alendronate treatment in postmenopausal women with osteoporosis. *The American journal of medicine*. 1996;101(5):488-501.
252. Silverman SL, Christiansen C, Genant HK, et al. Efficacy of bazedoxifene in reducing new vertebral fracture risk in postmenopausal women with osteoporosis: Results from a 3-year, randomized, placebo-, and active-controlled clinical trial. *Journal of Bone and Mineral Research*. 2008;23(12):1923-1934.
253. Bell NH, Bilezikian JP, Bone HG, Kaur A, Maragoto A, Santora AC. Alendronate increases bone mass and reduces bone markers in postmenopausal African-American women. *Journal of Clinical Endocrinology and Metabolism*. 2002;87(6):2792-2797.
254. Chailurkit LO, Jongjaroenprasert W, Rungbunnapun S, Ongphiphadhanakul B, Sae-tung S, Rajatanavin R. Effect of alendronate on bone mineral density and bone turnover in Thai postmenopausal osteoporosis. *J Bone Miner Metab*. 2003;21(6):421-427.
255. Rosen CJ, Hochberg MC, Bonnick SL, et al. Treatment with once-weekly alendronate 70 mg compared with once-weekly risedronate 35 mg in women with postmenopausal osteoporosis: A randomized double-blind study. *Journal of Bone and Mineral Research*. 2005;20(1):141-151.
256. Seeman E, Delmas PD, Hanley DA, et al. Microarchitectural deterioration of cortical and trabecular bone: differing effects of denosumab and alendronate. *Journal of bone and mineral research : the official journal of the American Society for Bone and Mineral Research*. 2010;25(8):1886-1894.
257. Finkelstein JS, Wyland JJ, Lee H, Neer RM. Effects of teriparatide, alendronate, or both in women with postmenopausal osteoporosis. *Journal of Clinical Endocrinology and Metabolism*. 2010;95(4):1838-1845.
258. Kung AWC, Yeung SSC, Chu LW. The efficacy and tolerability of alendronate in postmenopausal osteoporotic Chinese women: A randomized placebo-controlled study. *Calcified Tissue International*. 2000;67(4):286-290.
259. Meunier PJ, Slosman DO, Delmas PD, et al. Strontium ranelate: Dose-dependent effects in established postmenopausal vertebral osteoporosis - A 2-year randomized placebo controlled trial. *Journal of Clinical Endocrinology and Metabolism*. 2002;87(5):2060-2066.
260. Meunier PJ, Roux C, Ortolani S, et al. Effects of long-term strontium ranelate treatment on vertebral fracture risk in postmenopausal women with osteoporosis. *Osteoporosis International*. 2009;20(10):1663-1673.
261. Miller PD, Chines AA, Christiansen C, et al. Effects of bazedoxifene on BMD and bone turnover in postmenopausal women: 2-Yr results of a randomized, double-blind, placebo-, and active-controlled study. *Journal of Bone and Mineral Research*. 2008;23(4):525-535.
262. Välimäki MJ, Farrerons-Minguella J, Halse J, et al. Effects of risedronate 5 mg/d on bone mineral density and bone turnover markers in late-postmenopausal women with osteopenia: A multinational, 24-month, randomized, double-blind, placebo-controlled, parallel-group, phase III trial. *Clinical Therapeutics*. 2007;29(9):1937-1949.
263. Chesnut III CH, Skag A, Christiansen C, et al. Effects of oral ibandronate administered daily or intermittently on fracture risk in postmenopausal osteoporosis. *Journal of Bone and Mineral Research*. 2004;19(8):1241-1249.
264. Clemmesen B, Ravn P, Zegels B, Taquet AN, Christiansen C, Reginster JY. A 2-year phase II study with 1-year of follow-up of risedronate (NE-58095) in postmenopausal osteoporosis. *Osteoporosis International*. 1997;7(5):488-495.
265. Itabashi A, Yoh K, Chines AA, et al. Effects of bazedoxifene on bone mineral density, bone turnover, and safety in postmenopausal Japanese women with osteoporosis. *Journal of Bone and Mineral Research*. 2011;26(3):519-529.
266. Iwamoto J, Makita K, Sato Y, Takeda T, Matsumoto H. Alendronate is more effective than elcatonin in improving pain and quality of life in postmenopausal women with osteoporosis. *Osteoporosis International*. 2011;22(10):2735-2742.
267. Nakamura T, Matsumoto T, Sugimoto T, Shiraki M. Dose-response study of denosumab on bone mineral density and bone turnover markers in Japanese postmenopausal women with osteoporosis. *Osteoporosis International*. 2012;23(3):1131-1140.
268. Nakamura T, Sugimoto T, Nakano T, et al. Randomized Teriparatide [human parathyroid hormone (PTH) 1-34] Once-Weekly Efficacy Research (TOWER) trial for examining the reduction in new vertebral fractures in subjects with primary osteoporosis and high fracture risk. *Journal of clinical endocrinology and metabolism*. 2012;97(9):3097 - 3106.
269. Zhang XZ, Wang B, Yang J, et al. A randomized, multicenter controlled trial to compare the efficacy of recombinant human parathyroid hormone (1-34) with elcatonin in postmenopausal women with osteoporosis in China. *Chin Med J (Engl)*. 2009;122(24):2933-2938.
270. Sugimoto T, Shiraki M, Nakano T, et al. A randomized, double-blind, placebo-controlled study of once weekly elcatonin in primary postmenopausal osteoporosis. *Curr Med Res Opin*. 2019;35(3):447-454.

271. Recker R, Stakkestad JA, Chesnut Iii CH, et al. Insufficiently dosed intravenous ibandronate injections are associated with suboptimal antifracture efficacy in postmenopausal osteoporosis. *Bone*. 2004;34(5):890-899.
272. Miyauchi A, Matsumoto T, Shigeta H, Tsujimoto M, Thiebaud D, Nakamura T. Effect of teriparatide on bone mineral density and biochemical markers in Japanese women with postmenopausal osteoporosis: A 6-month dose-response study. *Journal of Bone and Mineral Metabolism*. 2008;26(6):624-634.

**eTable 7. Node Splitting Analyses on Vertebral Fracture.**

| Side                          | Direct     |           | Indirect   |           | Difference |           | P>z   |
|-------------------------------|------------|-----------|------------|-----------|------------|-----------|-------|
|                               | Coef.      | Std. Err. | Coef.      | Std. Err. | Coef.      | Std. Err. |       |
| Abaloparatide VS Ibandronate  | -0.0174119 | 0.7482911 | 1.621273   | 0.6427079 | -1.638685  | 0.9864143 | 0.097 |
| Abaloparatide VS Placebo      | 1.998909   | 0.5182419 | 0.6501423  | 0.7056628 | 1.348767   | 0.8277521 | 0.103 |
| Abaloparatide VS Teriparatide | 0.3506919  | 0.770868  | 0.165618   | 0.6192236 | 0.185074   | 0.9718293 | 0.849 |
| Alendronate VS Calcitonin     | 1.05E-11   | 2.049434  | -0.2422759 | 0.3553771 | 0.2422759  | 2.080018  | 0.907 |
| Alendronate VS Denosumab      | -0.691081  | 1.645544  | -0.6167593 | 0.4307527 | -0.0743217 | 1.708623  | 0.965 |
| Alendronate VS Placebo        | 0.5294609  | 0.2245798 | 0.7912885  | 0.4000535 | -0.2618277 | 0.4588501 | 0.568 |
| Alendronate VS Raloxifene     | -0.4542774 | 0.7060514 | 0.3498596  | 0.306024  | -0.8041371 | 0.7695188 | 0.296 |
| Alendronate VS Romosozumab    | -0.4684899 | 0.4528431 | -0.748037  | 0.5534775 | 0.279547   | 0.7151253 | 0.696 |
| Alendronate VS Teriparatide   | 0.1177827  | 0.6534047 | -0.932947  | 0.323879  | 1.05073    | 0.7292704 | 0.15  |
| Bazedoxifene VS Placebo       | 0.551421   | 0.4513419 | 0.0068044  | 0.9677628 | 0.5446167  | 1.069854  | 0.611 |
| Bazedoxifene VS Raloxifene    | -0.0300775 | 0.4625784 | 0.51456    | 0.9517115 | -0.5446375 | 1.069853  | 0.611 |
| Calcitonin VS Placebo         | 0.8318741  | 0.2992612 | 0.5913     | 2.057919  | 0.2405741  | 2.07932   | 0.908 |
| Denosumab VS Ibandronate      | 0.0024125  | 1.086103  | 0.7185958  | 0.551687  | -0.7161833 | 1.218186  | 0.557 |
| Denosumab VS Placebo          | 1.151271   | 0.4143862 | 1.503542   | 0.8986016 | -0.3522711 | 0.9961439 | 0.724 |
| Denosumab VS Zoledronate      | 2.209776   | 1.549074  | 0.1723293  | 0.4418225 | 2.037447   | 1.610849  | 0.206 |
| Etidronate VS Placebo         | 0.8728926  | 0.6073128 | 3.24372    | 254.519   | -2.370827  | 254.5195  | 0.993 |
| HRT VS Placebo                | 0.7626169  | 0.3923283 | 3.195547   | 118.4075  | -2.43293   | 118.4079  | 0.984 |
| Ibandronate VS Placebo        | 0.255382   | 0.4080425 | 1.726673   | 0.7101416 | -1.471291  | 0.8189596 | 0.072 |
| Lasofloxifene VS Placebo      | 0.4522047  | 0.425378  | 2.997899   | 241.8469  | -2.545694  | 241.8473  | 0.992 |
| PTH VS Placebo                | 1.14611    | 0.569711  | 3.402681   | 407.0736  | -2.25657   | 407.0737  | 0.996 |
| Placebo VS Raloxifene         | -0.2950316 | 0.2344493 | -1.099263  | 0.7334685 | 0.8042318  | 0.7695034 | 0.296 |
| Placebo VS Risedronate        | -0.4063351 | 0.2563069 | -0.5133924 | 0.4650762 | 0.1070573  | 0.531023  | 0.84  |
| Placebo VS Romosozumab        | -1.317416  | 0.5138934 | -1.037882  | 0.4973105 | -0.2795348 | 0.7151253 | 0.696 |
| Placebo VS Strontium Ranelate | -0.4700006 | 0.2011888 | -3.088405  | 61.71641  | 2.618404   | 61.71675  | 0.966 |
| Placebo VS Teriparatide       | -1.513859  | 0.3348998 | -1.110403  | 0.3453045 | -0.4034561 | 0.4778397 | 0.398 |
| Placebo VS Zoledronate        | -0.9864656 | 0.2307168 | 0.764235   | 0.9512932 | -1.750701  | 0.9786987 | 0.074 |
| Risedronate VS Teriparatide   | -0.8385412 | 0.360327  | -0.9454883 | 0.390057  | 0.1069471  | 0.5310286 | 0.84  |
| Teriparatide VS Zoledronate   | 1.829209   | 1.162675  | 0.3140701  | 0.3357844 | 1.515139   | 1.210192  | 0.211 |

**eTable 8. Node Splitting Analyses on All Adverse Event.**

| Side                          | Direct     |           | Indirect |           | Difference |           | P>z    |
|-------------------------------|------------|-----------|----------|-----------|------------|-----------|--------|
|                               | Coef.      | Std. Err. | Coef.    | Std. Err. | Coef.      | Std. Err. |        |
| Abaloparatide VS Ibandronate  | 0.0961461  | 0.1435711 | -0.08033 | 0.138199  | 0.176473   | 0.199278  | 0.376  |
| Abaloparatide VS Placebo      | -0.1440292 | 0.1186361 | 0.132279 | 0.147516  | -0.27631   | 0.189653  | 0.145  |
| Abaloparatide VS Teriparatide | -0.0914849 | 0.1667188 | -0.18278 | 0.167037  | 0.091294   | 0.235892  | 0.699  |
| Alendronate VS Denosumab      | -0.0796717 | 0.1339278 | 0.008281 | 0.095609  | -0.08795   | 0.164956  | 0.594  |
| Alendronate VS Ibandronate    | -0.1250165 | 0.1128771 | 0.121231 | 0.095704  | -0.24625   | 0.148048  | 0.096  |
| Alendronate VS Placebo        | 0.0578067  | 0.0623145 | -0.14016 | 0.076863  | 0.197965   | 0.099419  | 0.046* |
| Alendronate VS Raloxifene     | 0.010737   | 0.1064783 | -0.12677 | 0.149586  | 0.137507   | 0.183785  | 0.454  |
| Alendronate VS Romosozumab    | -0.1255145 | 0.1189033 | 0.026958 | 0.118137  | -0.15247   | 0.16509   | 0.356  |
| Alendronate Teriparatide      | -1.318177  | 0.4930268 | -0.06572 | 0.10003   | -1.25246   | 0.505562  | 0.013* |
| Bazedoxifene VS Placebo       | 0.1546776  | 0.1434724 | -0.46927 | 0.358876  | 0.62395    | 0.404294  | 0.123  |
| Bazedoxifene VS Raloxifene    | -0.0976686 | 0.1472378 | 0.506678 | 0.290988  | -0.60435   | 0.337329  | 0.073  |
| Calcitonin VS PTH             | 0.3422511  | 0.3033611 | 0.958878 | 0.180622  | -0.61663   | 0.353061  | 0.081  |
| Calcitonin VS Placebo         | -0.0344561 | 0.1317042 | -0.65107 | 0.327574  | 0.616614   | 0.35306   | 0.081  |
| Denosumab VS Ibandronate      | -0.144148  | 0.1662153 | 0.109164 | 0.103344  | -0.25331   | 0.195723  | 0.196  |
| Denosumab VS Placebo          | 0.0342938  | 0.1126626 | -0.02824 | 0.092707  | 0.062529   | 0.146226  | 0.669  |
| Denosumab VS Risedronate      | 0.2479802  | 0.1698212 | 0.003991 | 0.109793  | 0.243989   | 0.202222  | 0.228  |
| Denosumab VS Zoledronate      | 1.01E-10   | 0.1878482 | 0.197116 | 0.113974  | -0.19712   | 0.219721  | 0.37   |
| HRT VS Placebo                | 0.7437909  | 0.5631426 | -0.01069 | 140.9509  | 0.754481   | 140.9517  | 0.996  |
| Ibandronate VS Placebo        | -0.2067133 | 0.1106639 | 0.066108 | 0.087534  | -0.27282   | 0.141159  | 0.053  |
| Lasofloxifene VS Placebo      | -0.2129051 | 0.1398532 | 0.160541 | 1.038795  | -0.37345   | 1.044926  | 0.721  |
| Lasofloxifene VS Raloxifene   | -0.4455519 | 0.6359006 | -0.2036  | 0.168496  | -0.24195   | 0.65615   | 0.712  |
| PTH VS Placebo                | -0.9933354 | 0.1236053 | -0.3767  | 0.330715  | -0.61663   | 0.353059  | 0.081  |
| Placebo VS Raloxifene         | -0.0458486 | 0.1415347 | 0.012285 | 0.11771   | -0.05813   | 0.184349  | 0.753  |
| Placebo VS Risedronate        | 0.1105782  | 0.0990613 | 0.025514 | 0.128126  | 0.085064   | 0.163054  | 0.602  |
| Placebo VS Romosozumab        | -0.0183048 | 0.1097419 | -0.01903 | 0.128877  | 0.000729   | 0.163937  | 0.996  |
| Placebo VS Strontium Ranelate | 0.0230482  | 0.1136459 | 0.054798 | 100.5799  | -0.03175   | 100.58    | 1      |
| Placebo VS Teriparatide       | -0.0623683 | 0.1518625 | -0.12275 | 0.115146  | 0.060381   | 0.192048  | 0.753  |
| Placebo VS Zoledronate        | 0.1627083  | 0.0889787 | 0.079084 | 0.183083  | 0.083624   | 0.203165  | 0.681  |
| Risedronate VS Risedronate    | -0.0429965 | 0.1223675 | -0.36186 | 0.144365  | 0.318863   | 0.189791  | 0.093  |
| Romosozumab VS Teriparatide   | -0.5040923 | 0.1901978 | 0.115684 | 0.117321  | -0.61978   | 0.222681  | 0.005* |
| Teriparatide VS Zoledronate   | 0.5684547  | 0.3977862 | 0.2161   | 0.121999  | 0.352355   | 0.416074  | 0.397  |

**eTable 9. Node Splitting Analyses on Serious Adverse Event.**

| Side                          | Direct    |           | Indirect   |           | Difference |           | P>z    |
|-------------------------------|-----------|-----------|------------|-----------|------------|-----------|--------|
|                               | Coef.     | Std. Err. | Coef.      | Std. Err. | Coef.      | Std. Err. |        |
| Abaloparatide VS Ibandronate  | -0.3816   | 0.2211449 | 0.039768   | 0.1521001 | -0.421372  | 0.2684017 | 0.116  |
| Abaloparatide VS Placebo      | 0.007163  | 0.1283009 | -0.3741635 | 0.2019412 | 0.3813264  | 0.2388212 | 0.11   |
| Abaloparatide VS Teriparatide | 0.079512  | 0.1809446 | -0.1374274 | 0.2034582 | 0.2169394  | 0.2726158 | 0.426  |
| Alendronate VS Denosumab      | -0.15186  | 0.1767023 | -0.0673127 | 0.1282412 | -0.0845517 | 0.2178777 | 0.698  |
| Alendronate VS Ibandronate    | -0.12657  | 0.2389595 | -0.1764886 | 0.1327064 | 0.0499222  | 0.2733361 | 0.855  |
| Alendronate VS Placebo        | -0.11688  | 0.1333196 | -0.1866439 | 0.102383  | 0.0697611  | 0.1677085 | 0.677  |
| Alendronate VS Raloxifene     | -0.29978  | 0.1957281 | -0.1293355 | 0.133539  | -0.1704472 | 0.2361617 | 0.47   |
| Alendronate VS Romosozumab    | -0.10692  | 0.1250959 | -0.1351378 | 0.153176  | 0.028219   | 0.1955987 | 0.885  |
| Alendronate VS Teriparatide   | 0.173974  | 0.7022704 | -0.0848551 | 0.1274393 | 0.2588287  | 0.7144777 | 0.717  |
| Bazedoxifene VS Placebo       | 0.15444   | 0.1091297 | 0.4221753  | 0.399109  | -0.2677352 | 0.4131605 | 0.517  |
| Bazedoxifene VS Raloxifene    | 0.185624  | 0.1013131 | -0.1934114 | 0.3344678 | 0.379035   | 0.347586  | 0.276  |
| Calcitonin VS Etidronate      | -1.58E-11 | 0.537597  | -1.59035   | 0.812022  | 1.59035    | 0.9738533 | 0.102  |
| Calcitonin VS HRT             | -0.15063  | 0.5536925 | -1.740976  | 0.8227664 | 1.59035    | 0.9738533 | 0.102  |
| Calcitonin VS PTH             | 0.048553  | 2.006123  | -0.0902049 | 0.2020437 | 0.1387582  | 2.016272  | 0.945  |
| Calcitonin VS Placebo         | 0.165798  | 0.1089565 | 0.3043386  | 2.013057  | -0.138541  | 2.016002  | 0.945  |
| Denosumab VS Ibandronate      | -0.61463  | 0.2800534 | 0.0303638  | 0.1031907 | -0.6449945 | 0.2984598 | 0.031* |
| Denosumab VS Placebo          | -0.05534  | 0.0897132 | -0.0888574 | 0.1361742 | 0.0335127  | 0.1643841 | 0.838  |
| Denosumab VS Risedronate      | 0.063904  | 0.2646515 | -0.0806827 | 0.0993228 | 0.1445866  | 0.2826755 | 0.609  |
| Denosumab VS Zoledronate      | 0.162072  | 0.2968116 | -0.1769452 | 0.1106258 | 0.3390173  | 0.3167573 | 0.284  |
| Etidronate VS Placebo         | 0.922395  | 0.4753954 | -0.6679704 | 0.9210862 | 1.590365   | 0.9738487 | 0.102  |
| HRT VS Placebo                | 1.07302   | 0.4935238 | -0.5173446 | 0.9305722 | 1.590365   | 0.9738486 | 0.102  |
| Ibandronate VS Placebo        | -0.12987  | 0.0944288 | 0.2736514  | 0.1490818 | -0.4035259 | 0.1766759 | 0.022* |
| Lasofoxifene VS Placebo       | -0.01536  | 0.0960638 | 0.5151299  | 0.7893496 | -0.530494  | 0.801622  | 0.508  |
| Lasofoxifene VS Raloxifene    | 9.26E-02  | 0.4091308 | -0.0382647 | 0.1345086 | 0.1308339  | 0.4306623 | 0.761  |
| PTH VS Placebo                | 0.256002  | 0.1701464 | 0.1172191  | 2.009005  | 0.1387833  | 2.016197  | 0.945  |
| Placebo VS Raloxifene         | -0.00368  | 0.1030874 | -0.089022  | 0.1997794 | 0.085342   | 0.2264529 | 0.706  |
| Placebo VS Risedronate        | -0.01472  | 0.0687975 | 0.0952697  | 0.1638334 | -0.1099866 | 0.1790923 | 0.539  |
| Placebo VS Romosozumab        | 0.045223  | 0.1201689 | 0.0354875  | 0.1470307 | 0.0097353  | 0.1860861 | 0.958  |
| Placebo VS Strontium Ranelate | 0.041111  | 0.0935681 | 0.2031932  | 136.6413  | -0.1620821 | 136.6414  | 0.999  |
| Placebo VS Teriparatide       | -0.10497  | 0.1664363 | 0.1870875  | 0.1224568 | -0.2920602 | 0.2059511 | 0.156  |
| Placebo VS Zoledronate        | -0.09056  | 0.065053  | 0.2484592  | 0.3076665 | -0.3390164 | 0.3167535 | 0.284  |
| Risedronate VS Teriparatide   | 0.052998  | 0.1317469 | 0.1293568  | 0.1612245 | -0.0763588 | 0.2097215 | 0.716  |
| Romosozumab VS Teriparatide   | 0.410096  | 0.2826434 | -0.0504909 | 0.1338114 | 0.4605868  | 0.3114141 | 0.139  |

**eFigure 1. Abaloparatide Compared with Placebo on Vertebral Fracture.**

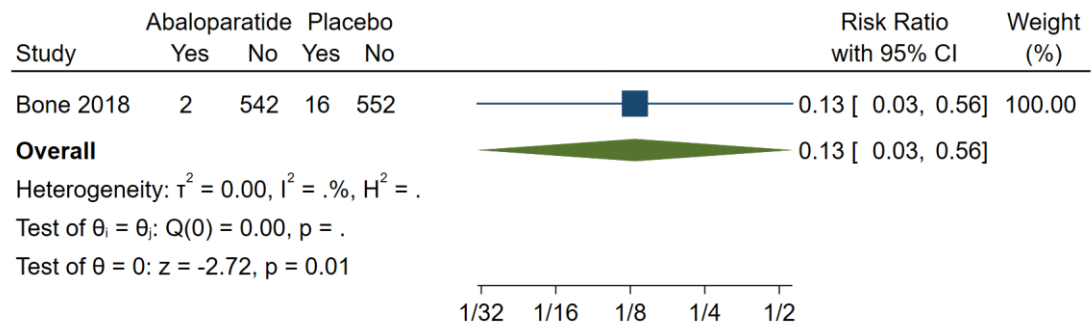

Random-effects REML model

**eFigure 2. Alendronate Compared with Placebo on Vertebral Fracture.**

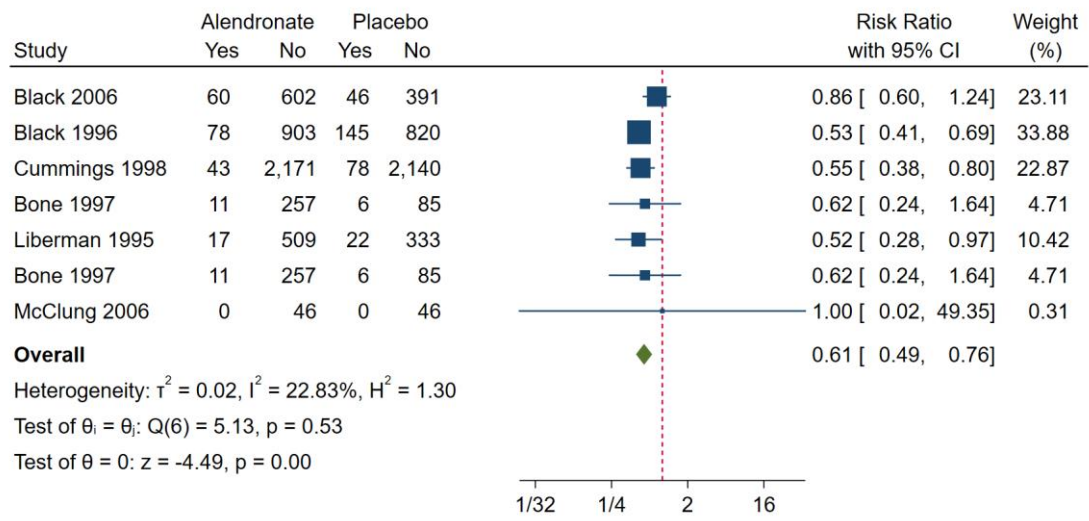

Random-effects REML model



**eFigure 3. Bazedoxifene Compared with Placebo on Vertebral Fracture.**

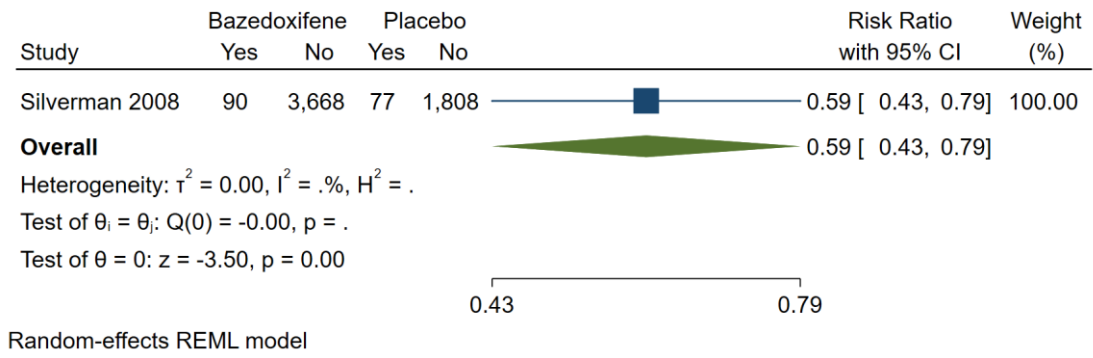

**eFigure 4. Calcitonin Compared with Placebo on Vertebral Fracture.**

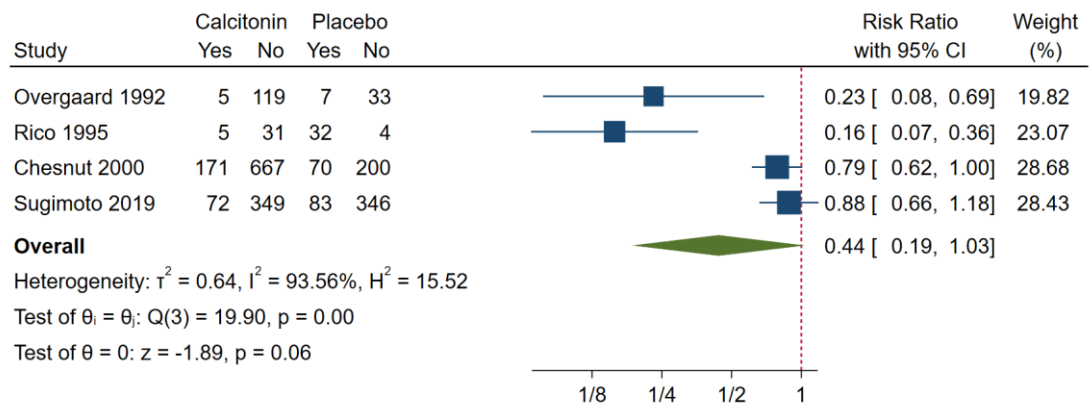

Random-effects REML model

**eFigure 5. Denosumab Compared with Placebo on Vertebral Fracture.**

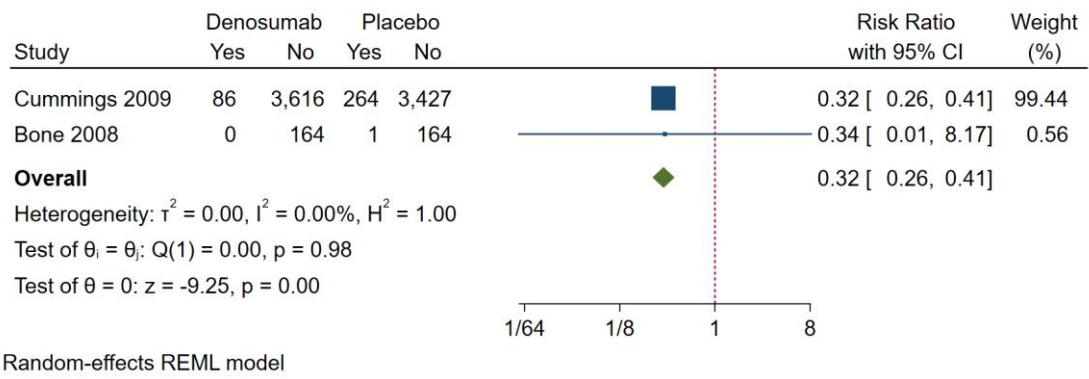

**eFigure 6. Etidronate Compared with Placebo on Vertebral Fracture.**

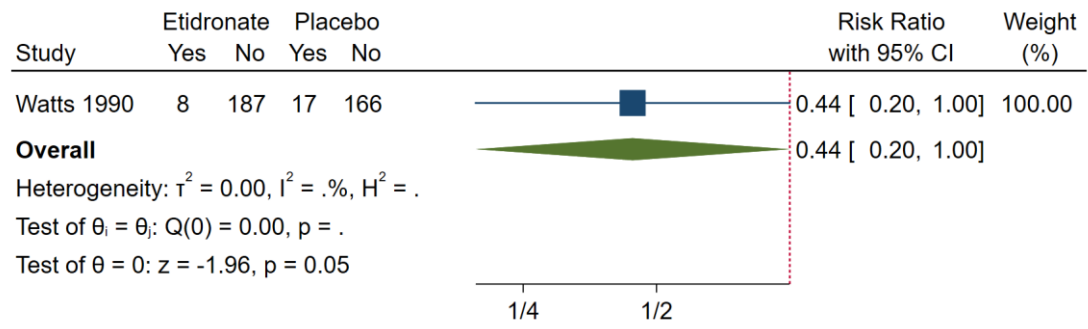

Random-effects REML model

**eFigure 7. HRT Compared with Placebo on Vertebral Fracture.**

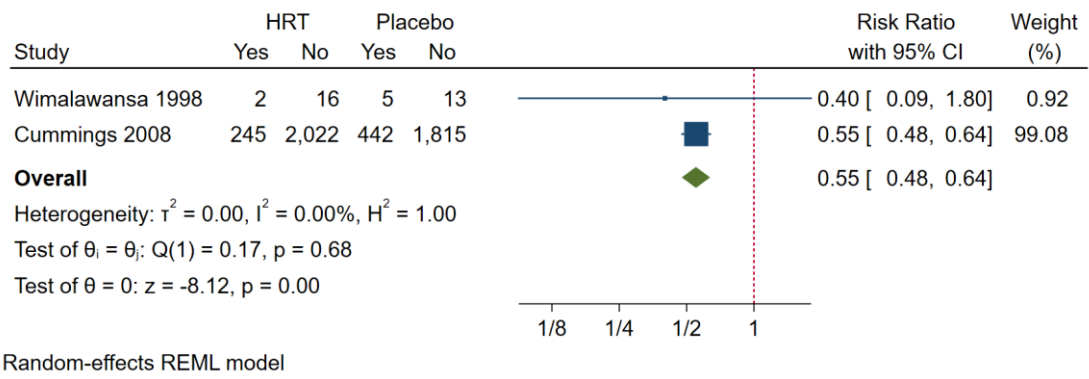

**eFigure 8. Ibandronate Compared with Placebo on Vertebral Fracture.**

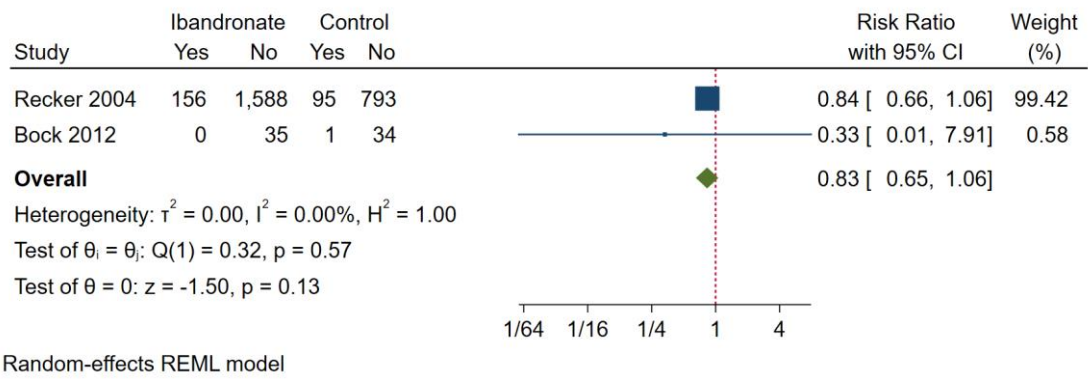

**eFigure 9. Lasofoxifene Compared with Placebo on Vertebral Fracture.**

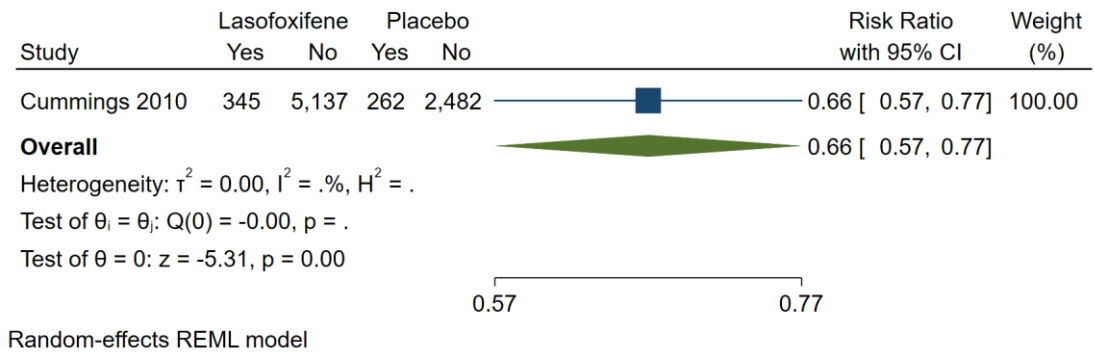

**eFigure 10. PTH Compared with Placebo on Vertebral Fracture.**

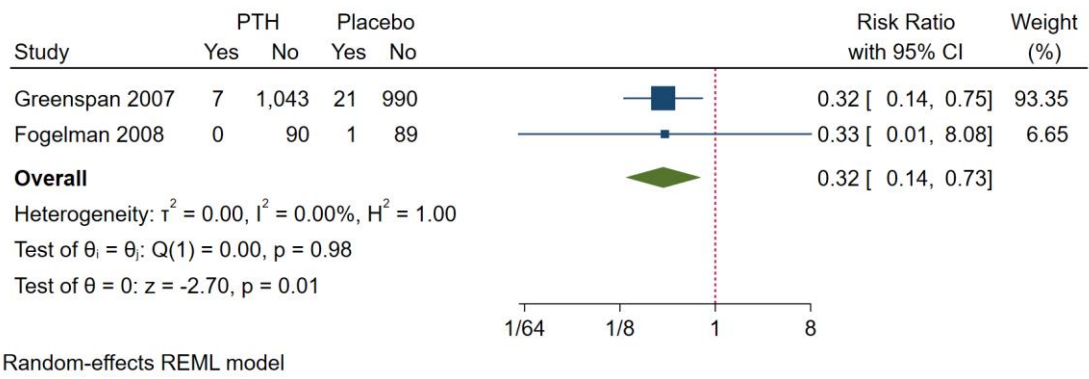



**eFigure 11. Raloxifene Compared with Placebo on Vertebral Fracture.**

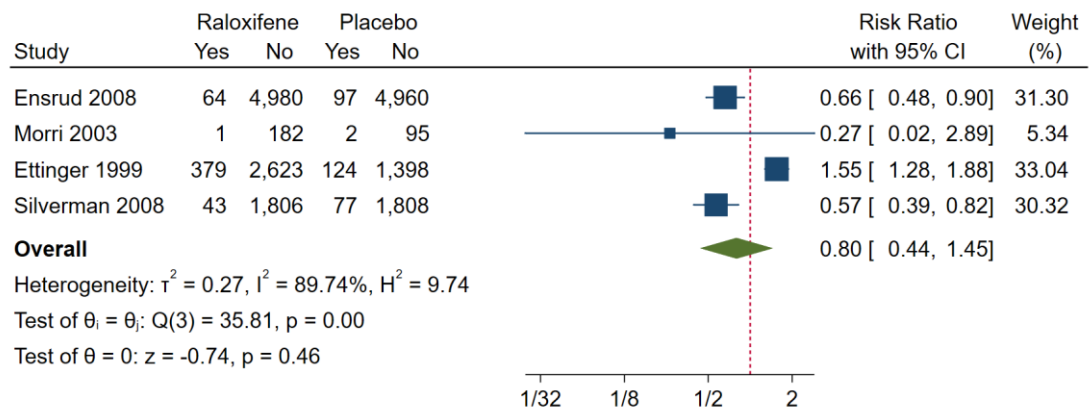

Random-effects REML model

**eFigure 12. Risedronate Compared with Placebo on Vertebral Fracture.**

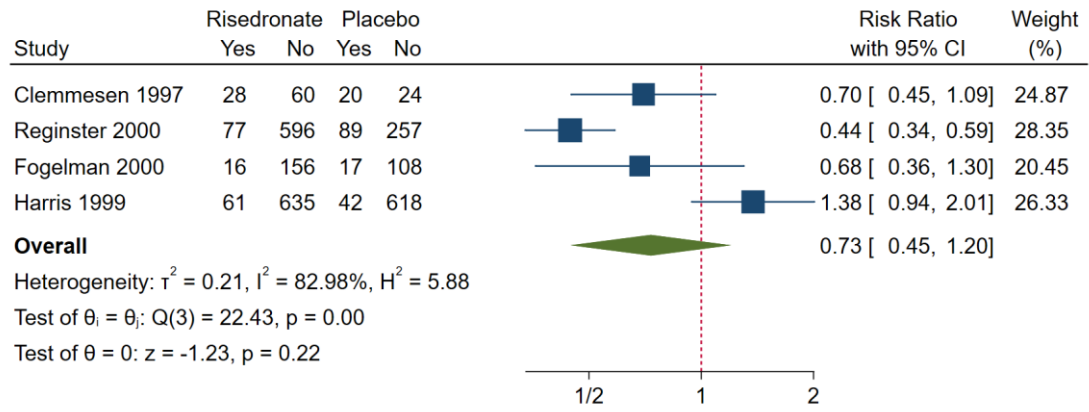

Random-effects REML model

**eFigure 13. Romosozumab Compared with Placebo on Vertebral Fracture.**

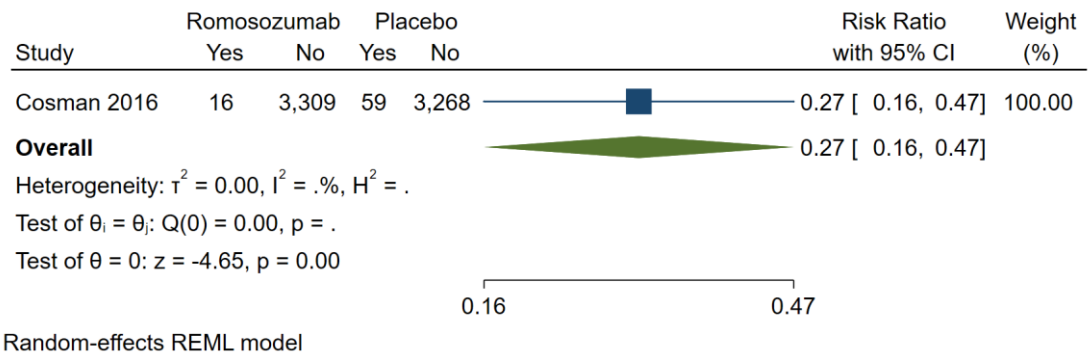

**eFigure 14. Strontium ranelate Compared with Placebo on Vertebral Fracture.**

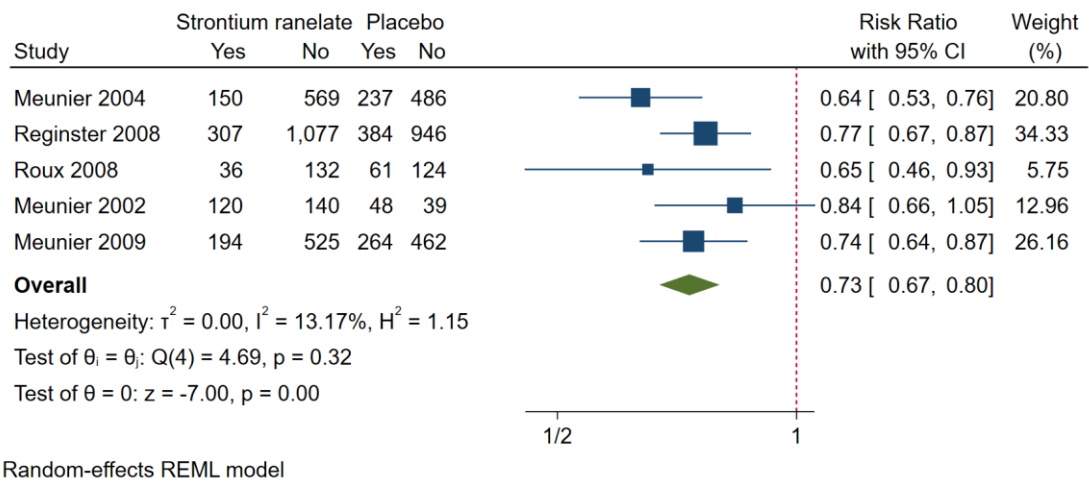

**eFigure 15. Teriparatide Compared with Placebo on Vertebral Fracture.**

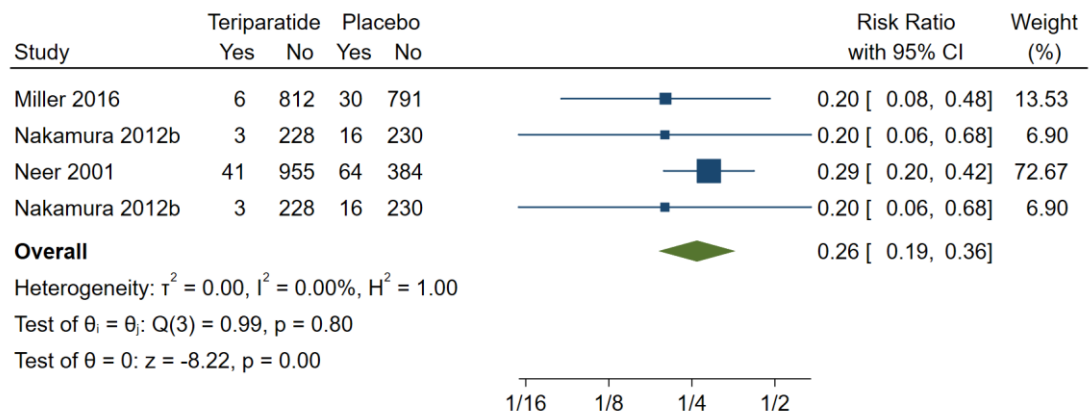

Random-effects REML model

**eFigure 16. Zoledronate Compared with Placebo on Vertebral Fracture.**

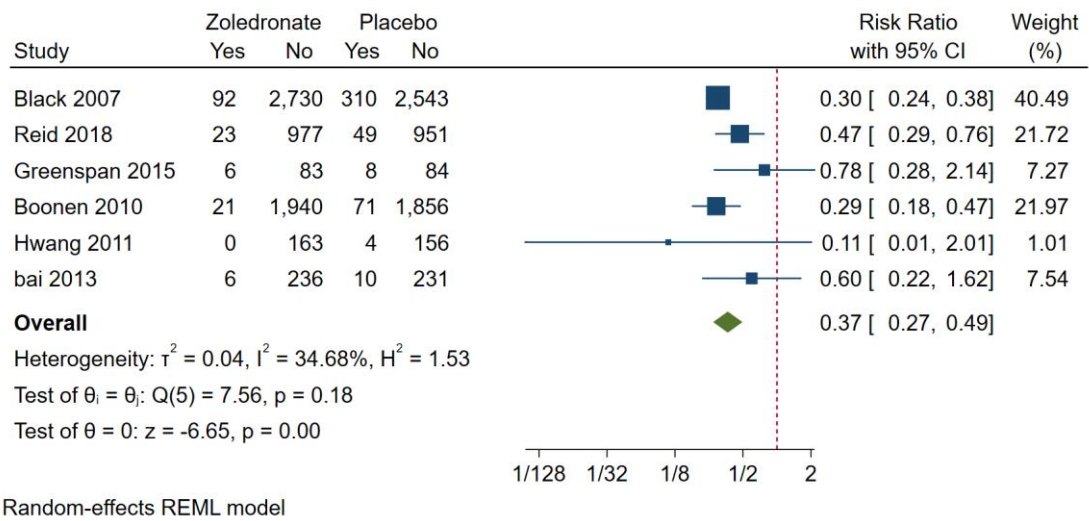

**eFigure 17.** Network Plots of Comparison-based Network Meta-analyses on Vertebral Fracture in Short-term ( $\leq 18$  months) Follow-up.

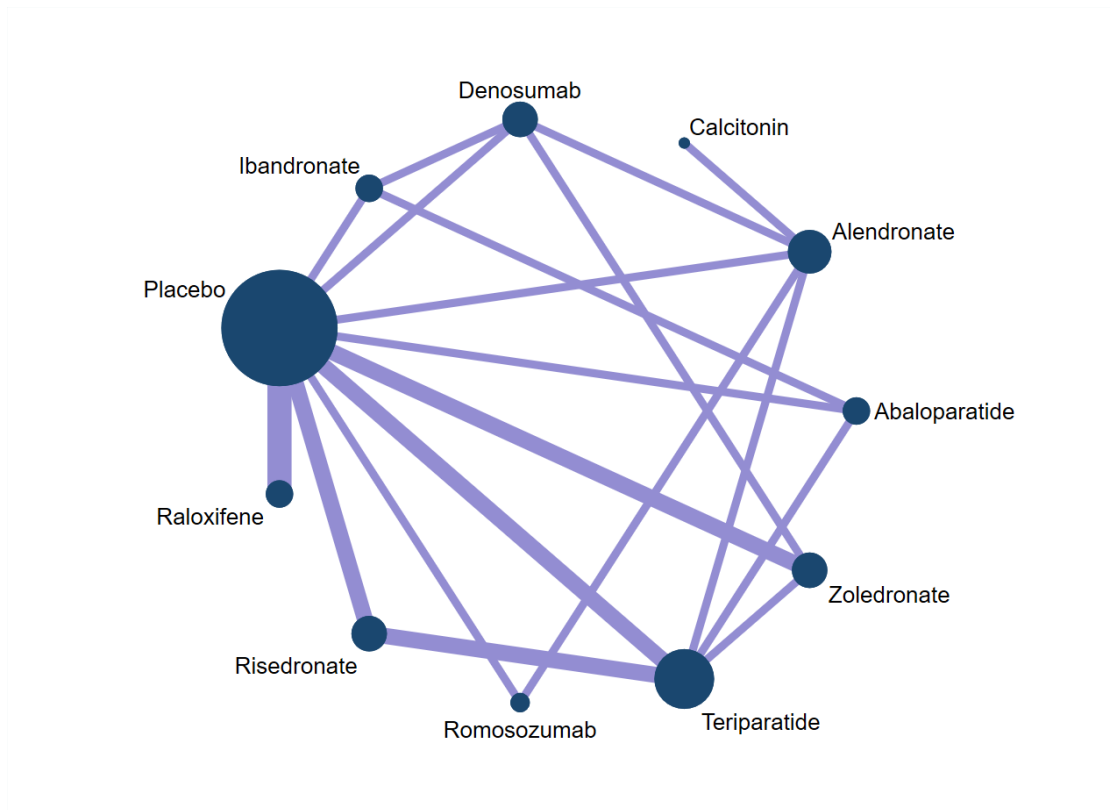

**eFigure 18.** Rank Probability of Vertebral Fracture in Short-term ( $\leq 18$  months) Follow-up Based Network Meta-analysis in the Consistency Model.

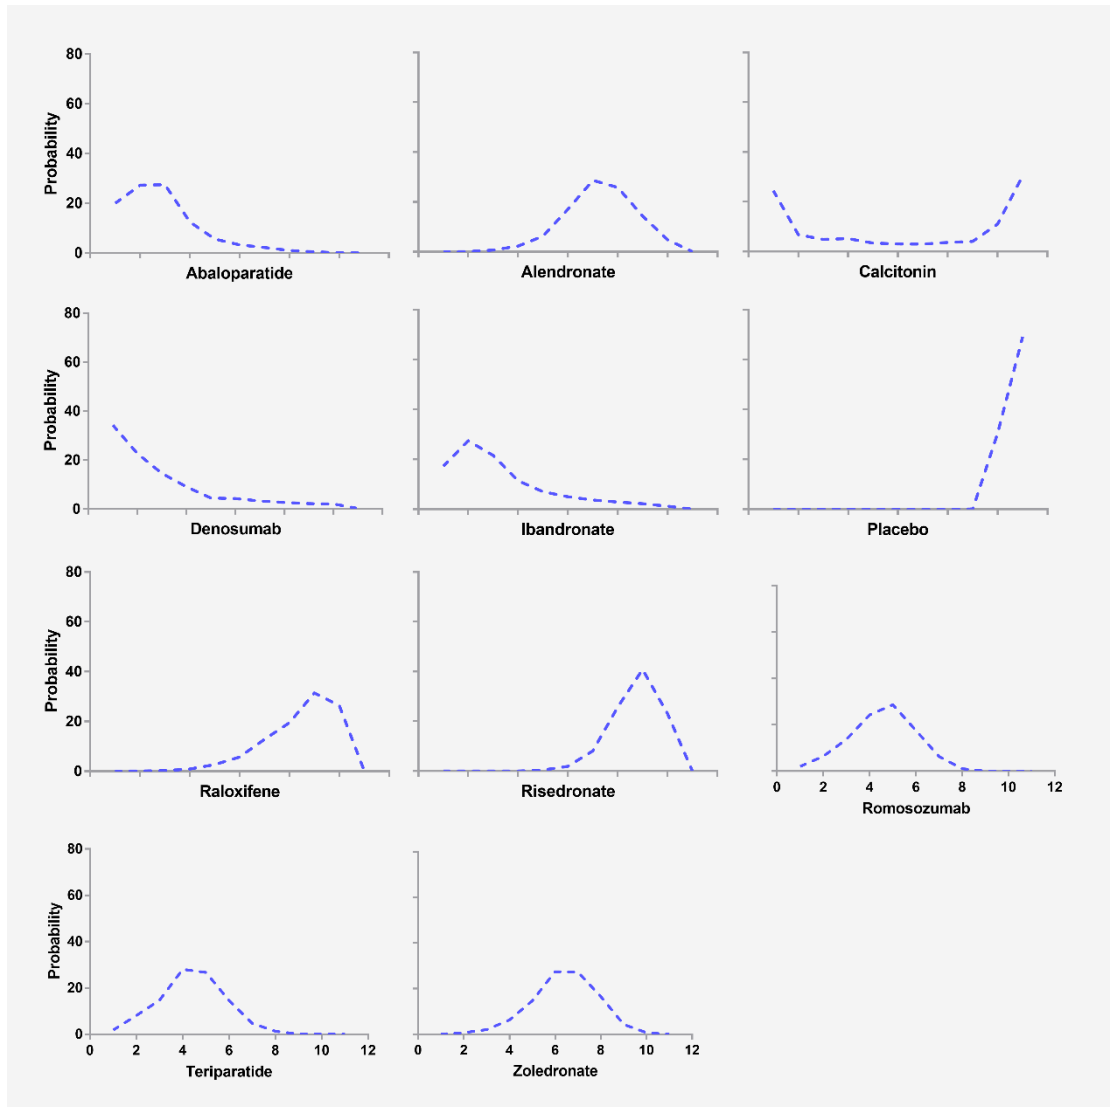



**eFigure 19.** Network Plots of Comparison-based Network Meta-analyses on Vertebral Fracture in Long-term (> 18 months) Follow-up.

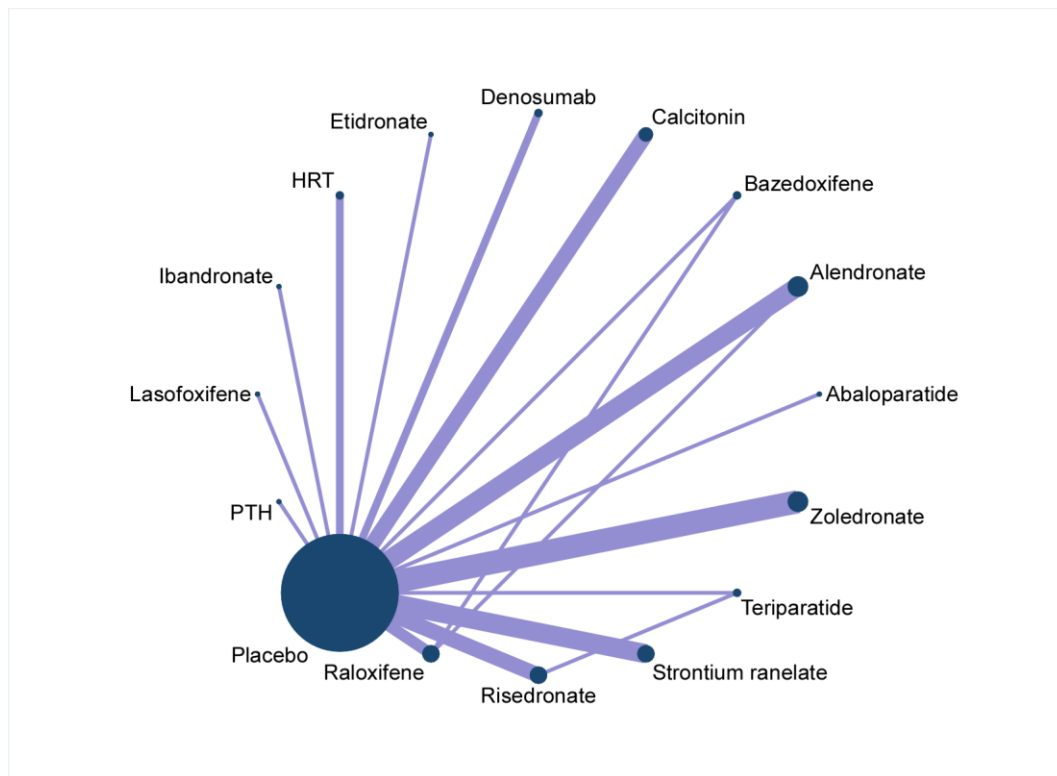

**eFigure 20.** Rank Probability of Vertebral Fracture in Long-term (> 18 months) Follow-up Based Network Meta-analysis in the Consistency Model.

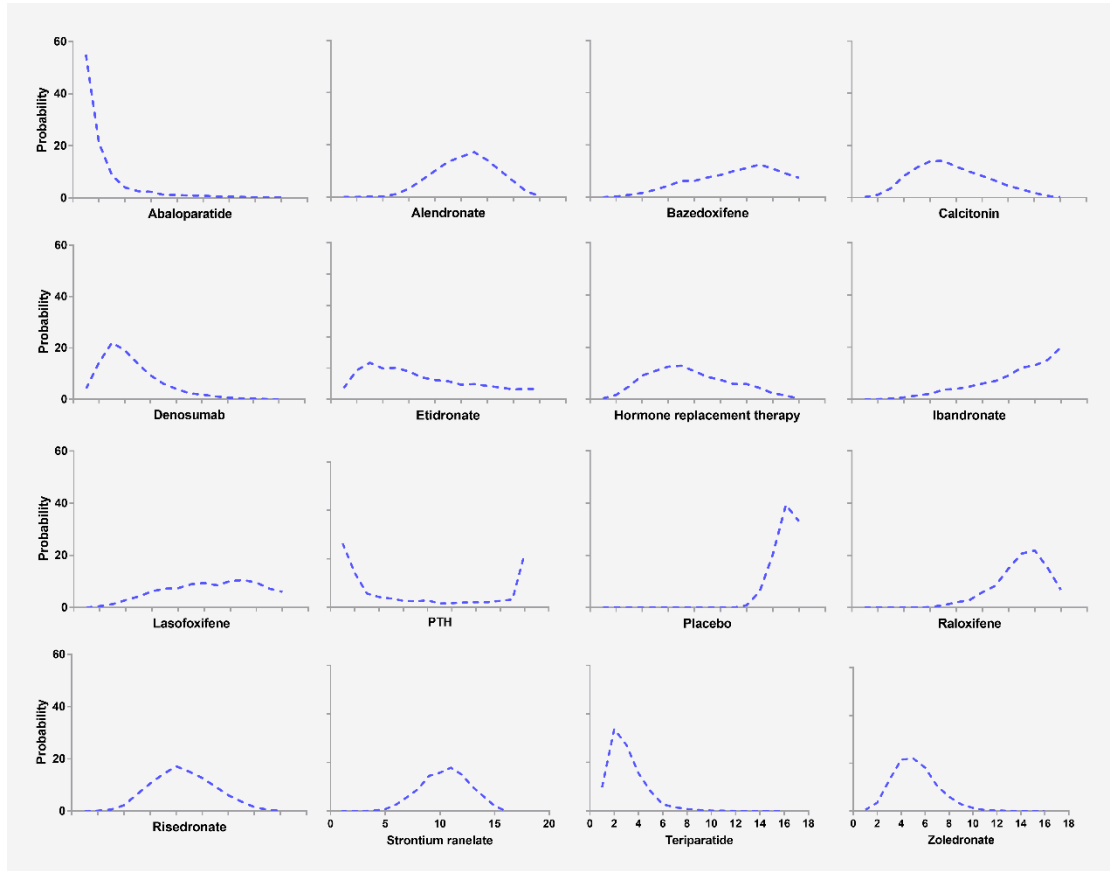

**eFigure 21. Abaloparatide Compared with Placebo on Serious Adverse Event.**

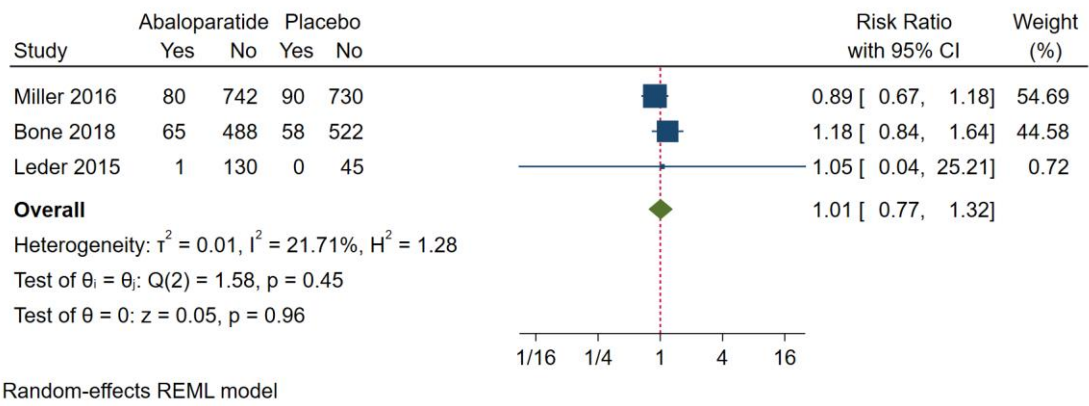

**eFigure 22. Alendronate Compared with Placebo on Serious Adverse Event.**

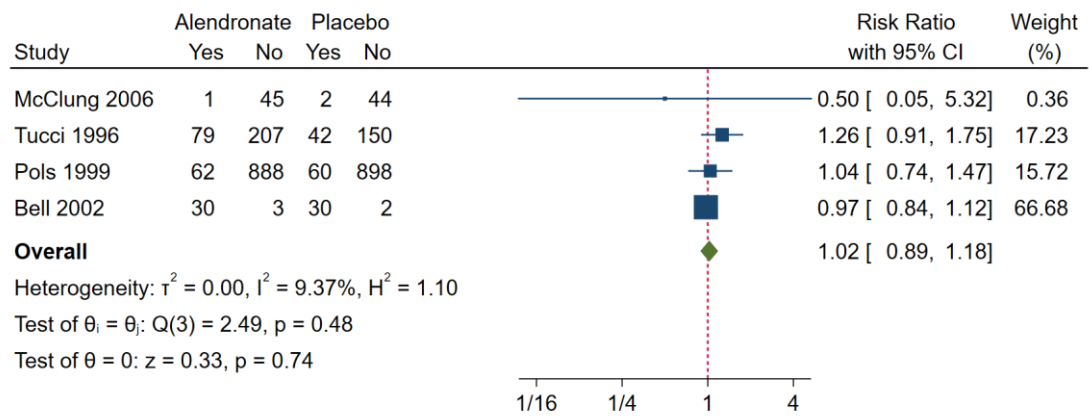

Random-effects REML model

**eFigure 23. Bazedoxifene Compared with Placebo on Serious Adverse Event.**

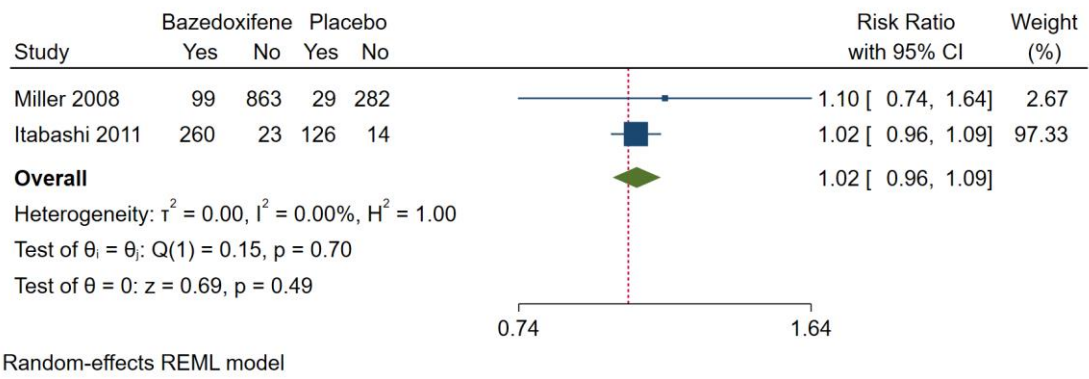

**eFigure 24. Calcitonin Compared with Placebo on Serious Adverse Event.**

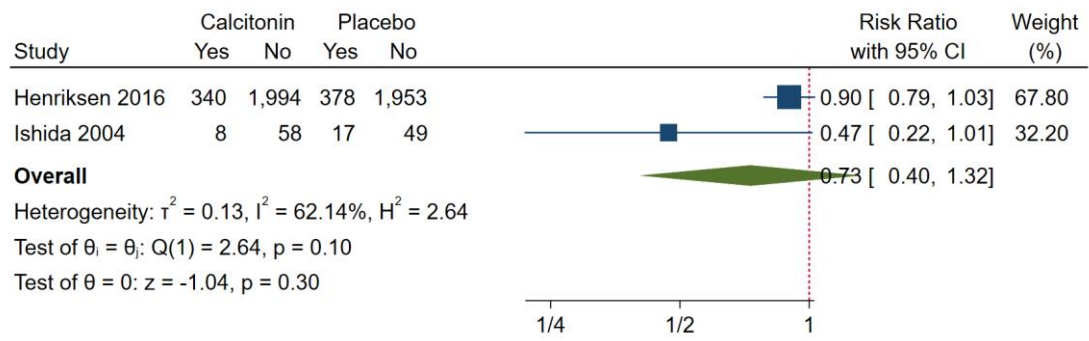

Random-effects REML model

**eFigure 25. Denosumab Compared with Placebo on Serious Adverse Event.**

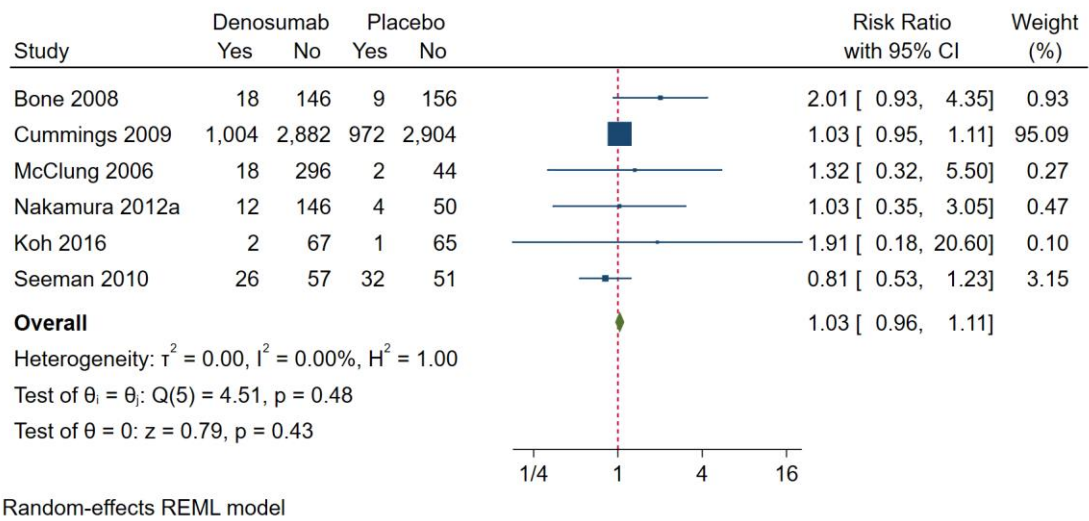

**eFigure 26. Etidronate Compared with Placebo on Serious Adverse Event.**

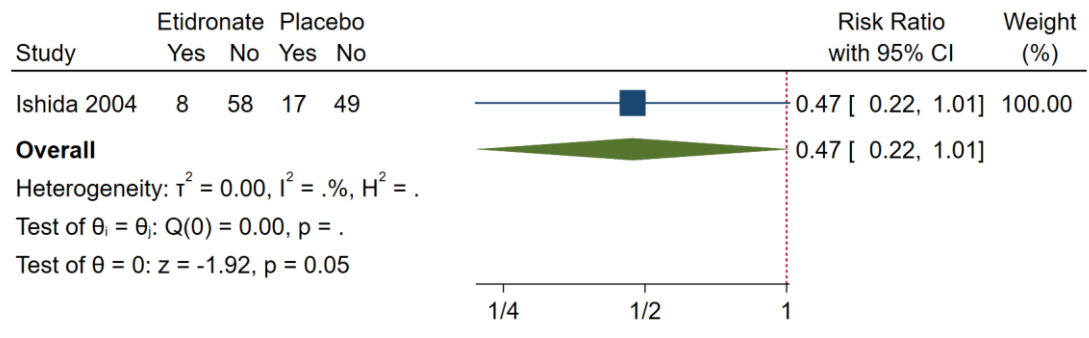

Random-effects REML model



**eFigure 27. HRT Compared with Placebo on Serious Adverse Event.**

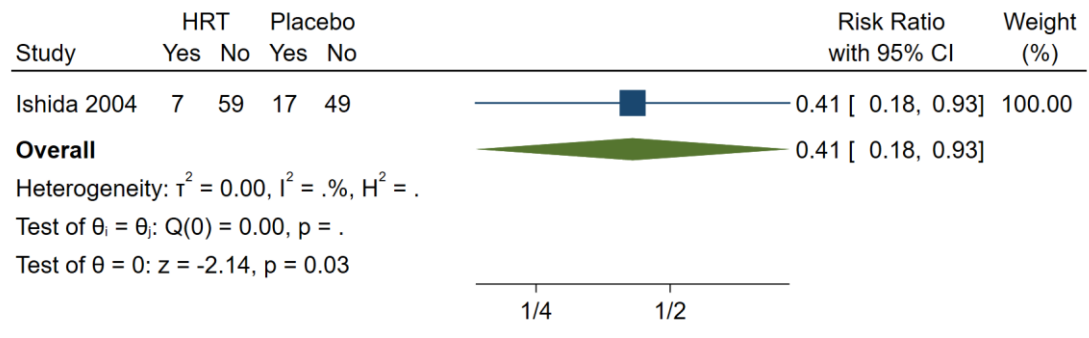

**eFigure 28. Ibandronate Compared with Placebo on Serious Adverse Event.**

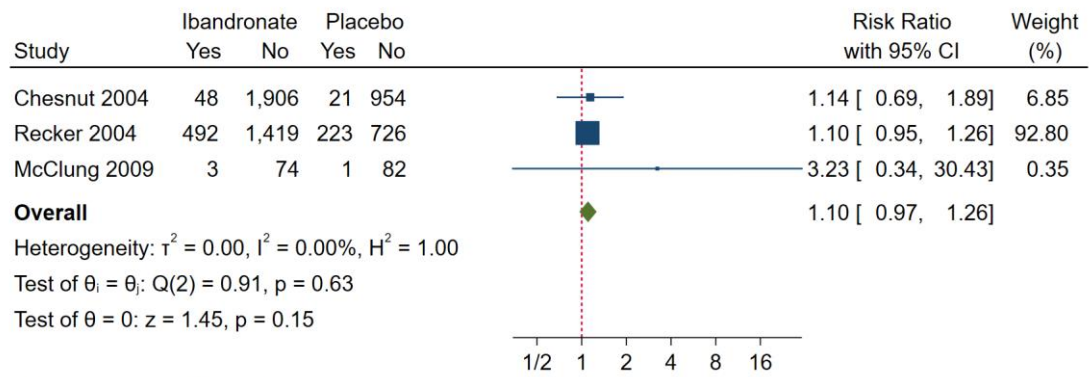

Random-effects REML model

**eFigure 29. Lasofoxifene Compared with Placebo on Serious Adverse Event.**

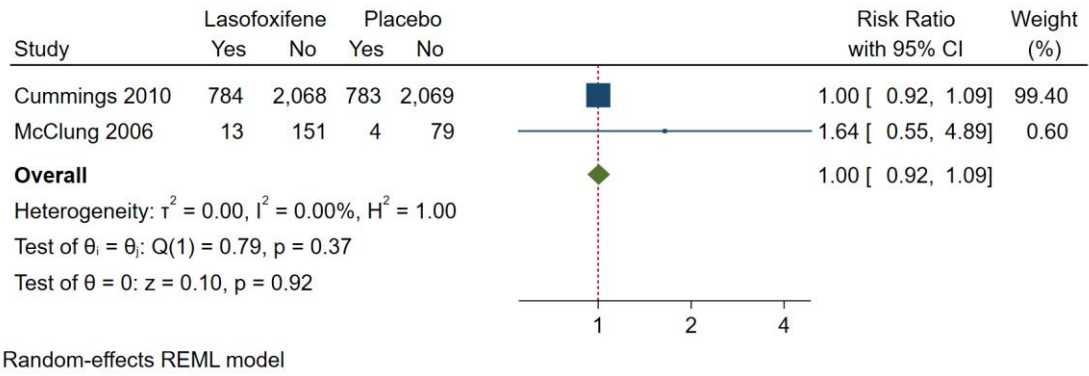

**eFigure 30. PTH Compared with Placebo on Serious Adverse Event.**

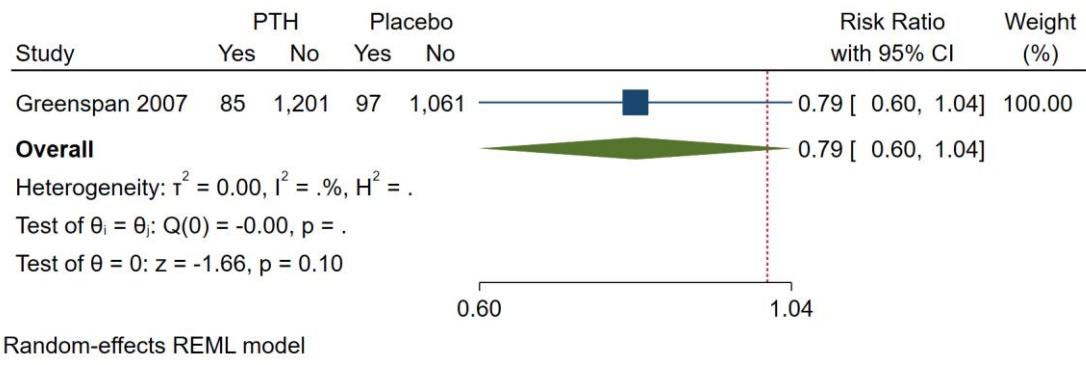

**eFigure 31. Raloxifene Compared with Placebo on Serious Adverse Event.**

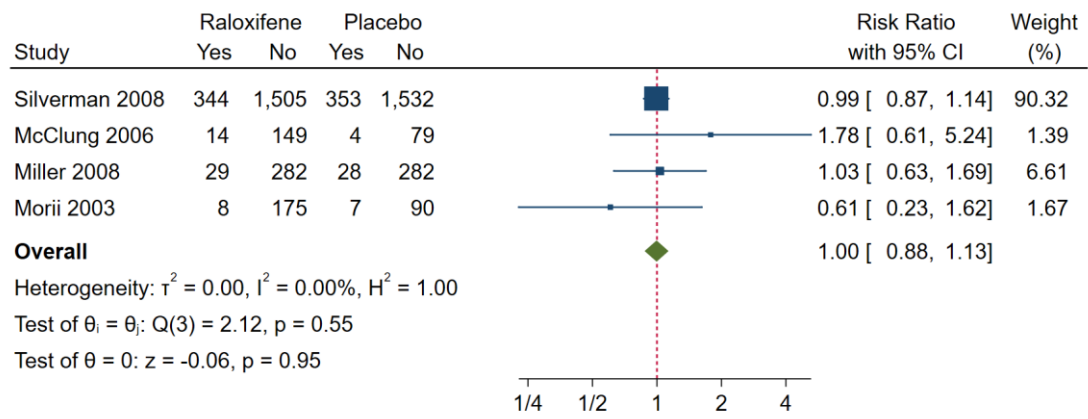

Random-effects REML model

**eFigure 32. Risedronate Compared with Placebo on Serious Adverse Event.**

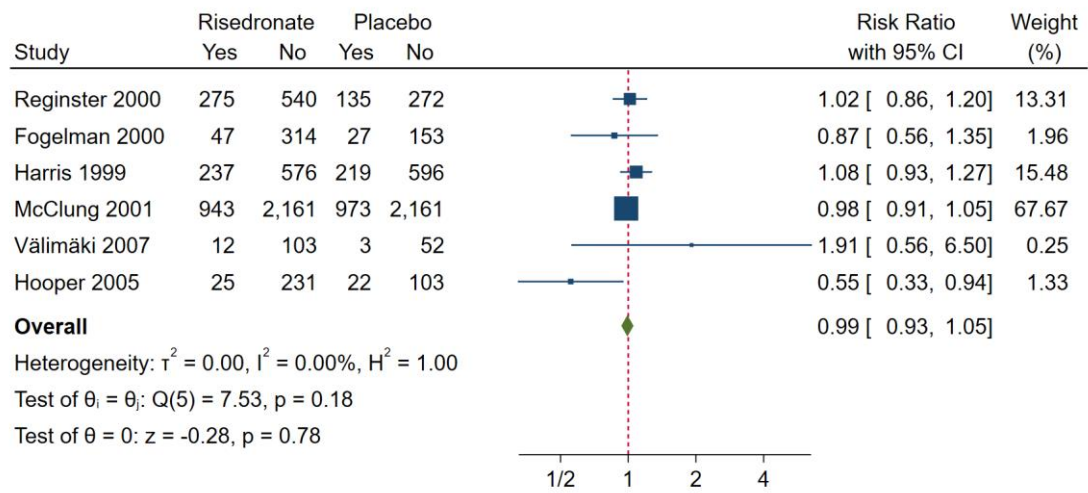

Random-effects REML model

**eFigure 33. Romosozumab Compared with Placebo on Serious Adverse Event.**

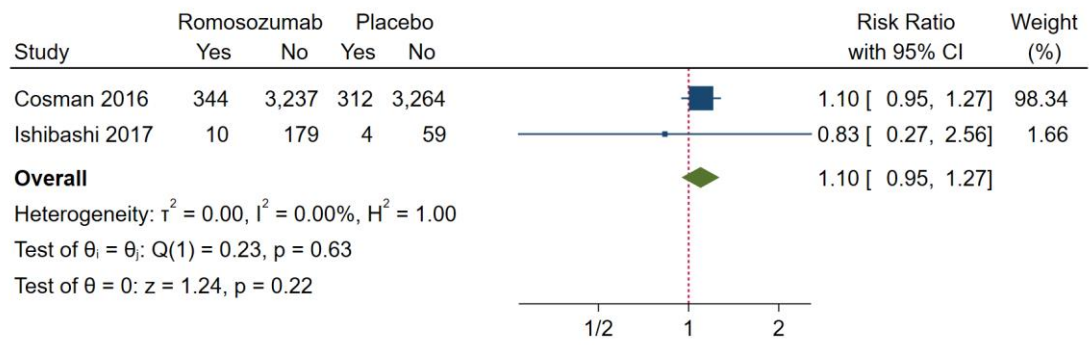

Random-effects REML model

**eFigure 34. Strontium ranelate Compared with Placebo on Serious Adverse Event.**

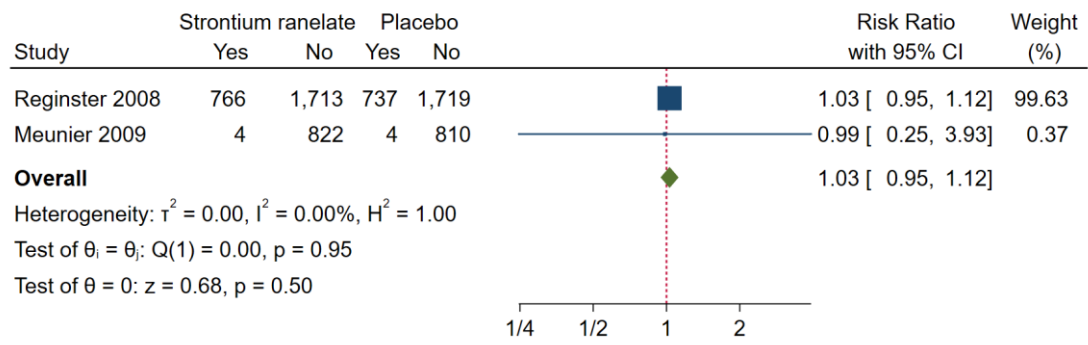

Random-effects REML model



**eFigure 35. Teriparatide Compared with Placebo on Serious Adverse Event.**

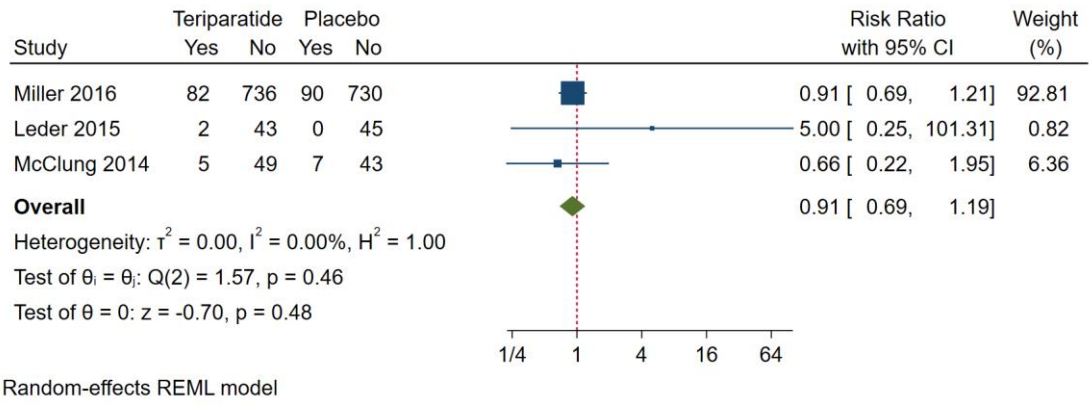

**eFigure 36. Zoledronate Compared with Placebo on Serious Adverse Event.**

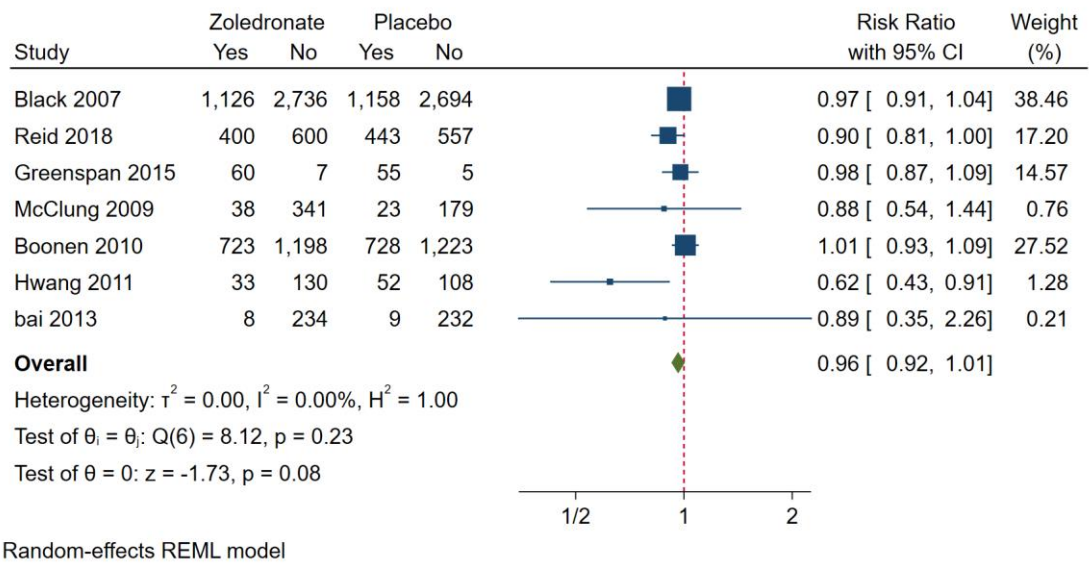

**eFigure 37. Network Plots of Comparison-based Network Meta-analyses on All Adverse Event.**

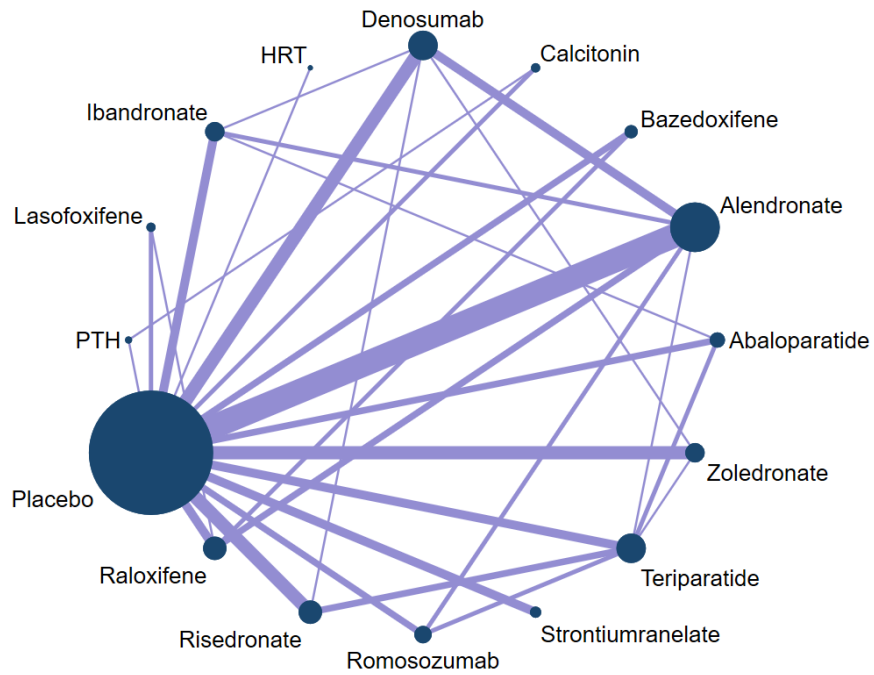

Each circular node represents a type of intervention. The circle size is proportional to the total number of patients. The width of the lines is proportional to the number of studies performing head-to-head comparisons in the same study. HRT: Hormone replacement therapy; PTH: parathyroid hormone.

**eFigure 38. Adverse event based on network meta-analysis in the inconsistency model.**

| Adverse event              |                            |                            |                            |                            |                            |                            |                             |                     |                     |                     |                     |                     |                     |                     |            |
|----------------------------|----------------------------|----------------------------|----------------------------|----------------------------|----------------------------|----------------------------|-----------------------------|---------------------|---------------------|---------------------|---------------------|---------------------|---------------------|---------------------|------------|
| <b>Zol</b>                 |                            |                            |                            |                            |                            |                            |                             |                     |                     |                     |                     |                     |                     |                     |            |
| 0.69<br>(0.26,1.82)        | <b>Ter</b>                 |                            |                            |                            |                            |                            |                             |                     |                     |                     |                     |                     |                     |                     |            |
| 0.67<br>(0.28,1.64)        | 0.97<br>(0.60,1.58)        | <b>Str</b>                 |                            |                            |                            |                            |                             |                     |                     |                     |                     |                     |                     |                     |            |
| 0.96<br>(0.26,3.61)        | 1.39<br>(0.47,4.15)        | 1.43<br>(0.52,3.96)        | <b>Rom</b>                 |                            |                            |                            |                             |                     |                     |                     |                     |                     |                     |                     |            |
| 0.78<br>(0.49,1.23)        | 1.13<br>(0.43,2.93)        | 1.16<br>(0.48,2.77)        | 0.81<br>(0.22,3.00)        | <b>Ris</b>                 |                            |                            |                             |                     |                     |                     |                     |                     |                     |                     |            |
| 0.71<br>(0.30,1.68)        | 1.02<br>(0.35,3.00)        | 1.05<br>(0.38,2.86)        | 0.73<br>(0.18,2.98)        | 0.90<br>(0.38,2.13)        | <b>Ral</b>                 |                            |                             |                     |                     |                     |                     |                     |                     |                     |            |
| 0.70<br>(0.29,1.65)        | 1.01<br>(0.65,1.56)        | 1.03<br>(0.84,1.27)        | 0.72<br>(0.27,1.96)        | 0.89<br>(0.38,2.09)        | 0.99<br>(0.37,2.64)        | <b>Pla</b>                 |                             |                     |                     |                     |                     |                     |                     |                     |            |
| <b>0.26</b><br>(0.11,0.63) | <b>0.37</b><br>(0.23,0.61) | <b>0.38</b><br>(0.28,0.51) | <b>0.27</b><br>(0.10,0.74) | <b>0.33</b><br>(0.14,0.79) | <b>0.37</b><br>(0.13,1.00) | <b>0.37</b><br>(0.30,0.46) | <b>PTH</b>                  |                     |                     |                     |                     |                     |                     |                     |            |
| 0.59<br>(0.24,1.44)        | 0.85<br>(0.51,1.40)        | 0.87<br>(0.63,1.20)        | 0.61<br>(0.22,1.70)        | 0.75<br>(0.31,1.82)        | 0.83<br>(0.30,2.29)        | 0.84<br>(0.66,1.07)        | <b>2.28</b><br>(1.65,3.14)  | <b>Las</b>          |                     |                     |                     |                     |                     |                     |            |
| 0.58<br>(0.22,1.50)        | 0.83<br>(0.56,1.23)        | 0.86<br>(0.54,1.35)        | 0.60<br>(0.20,1.76)        | 0.74<br>(0.29,1.90)        | 0.82<br>(0.28,2.37)        | 0.83<br>(0.55,1.24)        | <b>2.24</b><br>(1.42,3.53)  | 0.98<br>(0.61,1.58) | <b>Iba</b>          |                     |                     |                     |                     |                     |            |
| 1.46<br>(0.36,5.90)        | 2.12<br>(0.65,6.89)        | 2.17<br>(0.71,6.62)        | 1.52<br>(0.35,6.69)        | 1.88<br>(0.47,7.50)        | 2.08<br>(0.48,9.05)        | 2.10<br>(0.70,6.29)        | <b>5.68</b><br>(1.86,17.33) | 2.50<br>(0.81,7.66) | 2.54<br>(0.79,8.15) | <b>HRT</b>          |                     |                     |                     |                     |            |
| 1.00<br>(0.71,1.41)        | 1.44<br>(0.58,3.58)        | 1.48<br>(0.65,3.36)        | 1.04<br>(0.29,3.71)        | 1.28<br>(0.94,1.74)        | 1.42<br>(0.64,3.15)        | 1.44<br>(0.65,3.17)        | <b>3.88</b><br>(1.71,8.80)  | 1.70<br>(0.74,3.90) | 1.73<br>(0.71,4.21) | 0.68<br>(0.18,2.64) | <b>Den</b>          |                     |                     |                     |            |
| 0.67<br>(0.27,1.64)        | 0.97<br>(0.59,1.60)        | 0.99<br>(0.73,1.36)        | 0.70<br>(0.25,1.94)        | 0.86<br>(0.36,2.07)        | 0.95<br>(0.35,2.62)        | 0.96<br>(0.76,1.22)        | <b>2.60</b><br>(1.90,3.56)  | 1.14<br>(0.82,1.60) | 1.16<br>(0.73,1.85) | 0.46<br>(0.15,1.40) | 0.67<br>(0.29,1.53) | <b>Cal</b>          |                     |                     |            |
| 1.14<br>(0.37,3.55)        | 1.65<br>(0.70,3.89)        | 1.69<br>(0.78,3.64)        | 1.18<br>(0.34,4.09)        | 1.46<br>(0.47,4.50)        | 1.61<br>(0.47,5.53)        | 1.64<br>(0.78,3.43)        | <b>4.42</b><br>(2.05,9.53)  | 1.94<br>(0.89,4.23) | 1.97<br>(0.85,4.58) | 0.78<br>(0.21,2.92) | 1.14<br>(0.39,3.37) | 1.70<br>(0.78,3.69) | <b>Baz</b>          |                     |            |
| 0.71<br>(0.30,1.66)        | 1.03<br>(0.36,2.98)        | 1.06<br>(0.39,2.84)        | 0.74<br>(0.18,2.97)        | 0.91<br>(0.40,2.10)        | 1.01<br>(0.84,1.21)        | 1.02<br>(0.39,2.69)        | <b>2.76</b><br>(1.03,7.43)  | 1.21<br>(0.45,3.29) | 1.23<br>(0.43,3.52) | 0.49<br>(0.11,2.10) | 0.71<br>(0.33,1.55) | 1.06<br>(0.39,2.87) | 0.63<br>(0.19,2.11) | <b>Ale</b>          |            |
| 1.08<br>(0.73,1.62)        | 2.63<br>(0.70,9.85)        | 1.10<br>(0.86,1.41)        | 0.43<br>(0.14,1.36)        | 0.64<br>(0.27,1.49)        | 1.35<br>(0.60,3.06)        | 1.42<br>(0.63,3.21)        | 2.00<br>(0.78,5.11)         | 0.95<br>(0.64,1.41) | 0.56<br>(0.25,1.25) | 1.48<br>(0.67,3.25) | 0.89<br>(0.32,2.47) | 0.71<br>(0.15,3.41) | 0.97<br>(0.37,2.57) | 1.40<br>(0.48,4.07) | <b>Aba</b> |

Each cell of the profile contains the pooled mean difference and 95% credibility intervals for disability change; significant results are in bold. Aba: Abaloparatide; Ale: Alendronate; Baz: Bazedoxifene; Cal: Calcitonin; Den: Denosumab; HRT: Hormone replacement therapy; Iba: Ibandronate; Las: Lasofoxifene; PTH: parathyroid hormone; Ral: Raloxifene; Ris: Risedronate; Rom: Romosozumab; Str: Strontium ranelate; Ter: Teriparatide; Zol: Zoledronate.

**eFigure 39. Abaloparatide Compared with Placebo on All Adverse Event.**

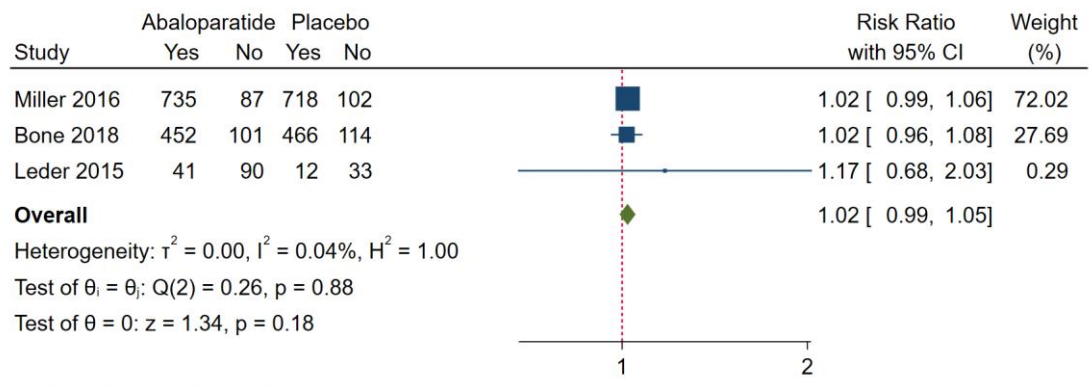

Random-effects REML model

**eFigure 40. Alendronate Compared with Placebo on All Adverse Event.**

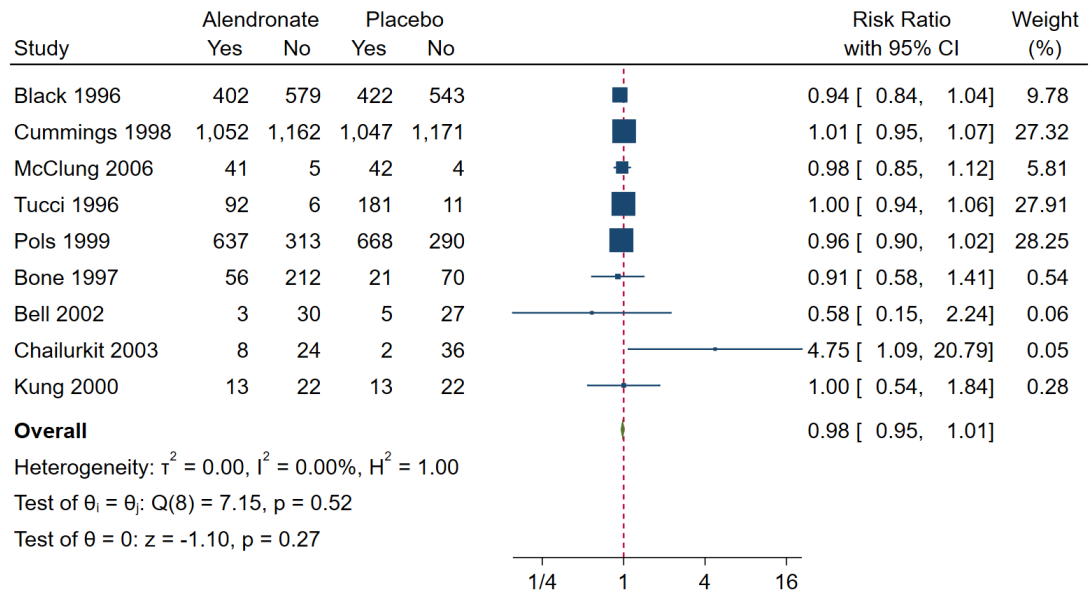

Random-effects REML model

**eFigure 41. Bazedoxifene Compared with Placebo on All Adverse Event.**

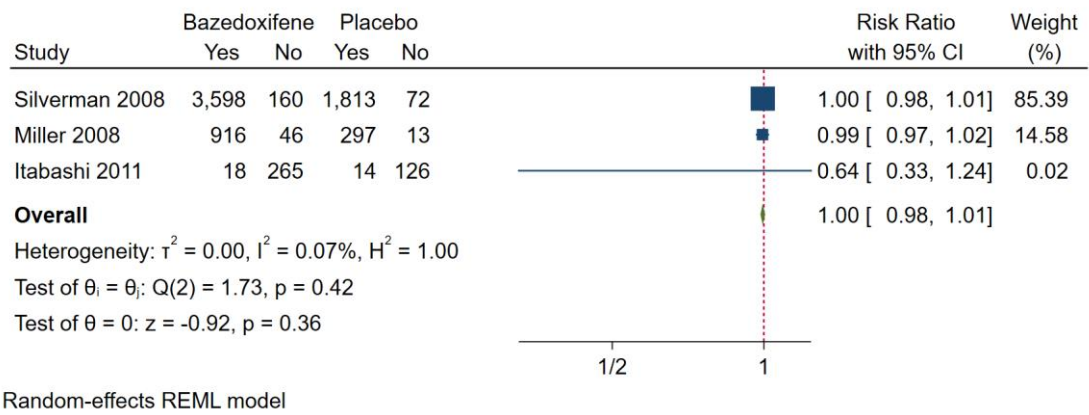

**eFigure 42. Calcitonin Compared with Placebo on All Adverse Event.**

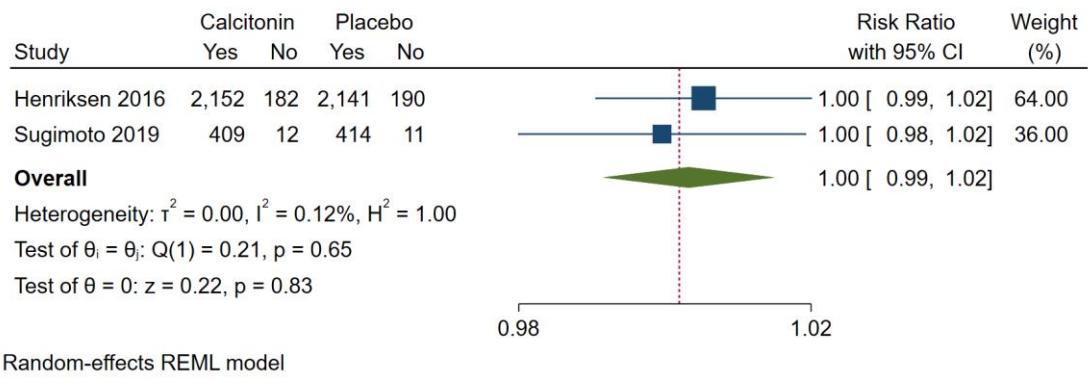



**eFigure 43. Denosumab Compared with Placebo on All Adverse Event.**

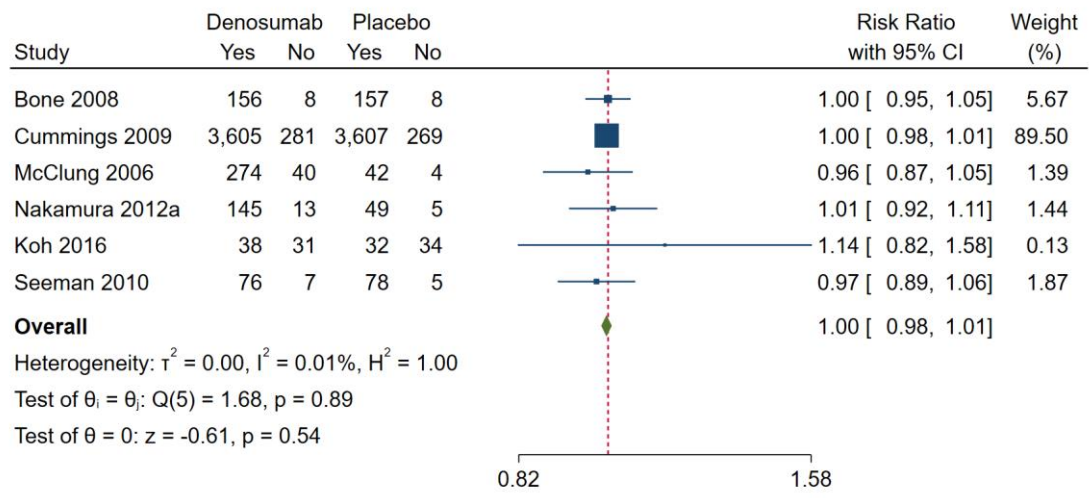

**eFigure 44. HRT Compared with Placebo on All Adverse Event.**

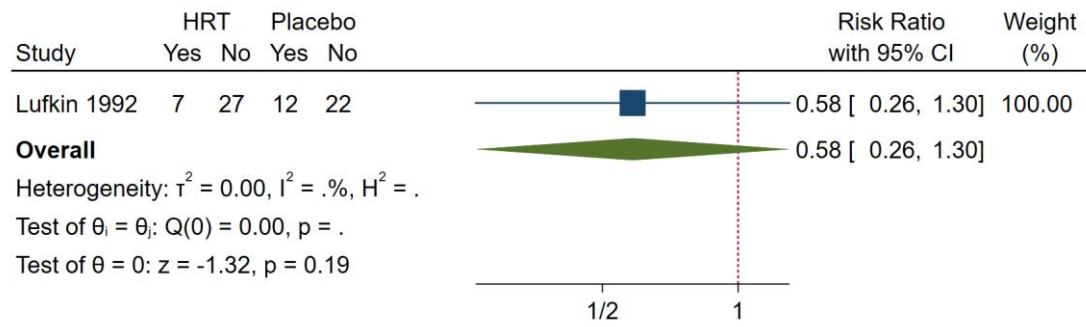

Random-effects REML model

**eFigure 45. Ibandronate Compared with Placebo on All Adverse Event.**

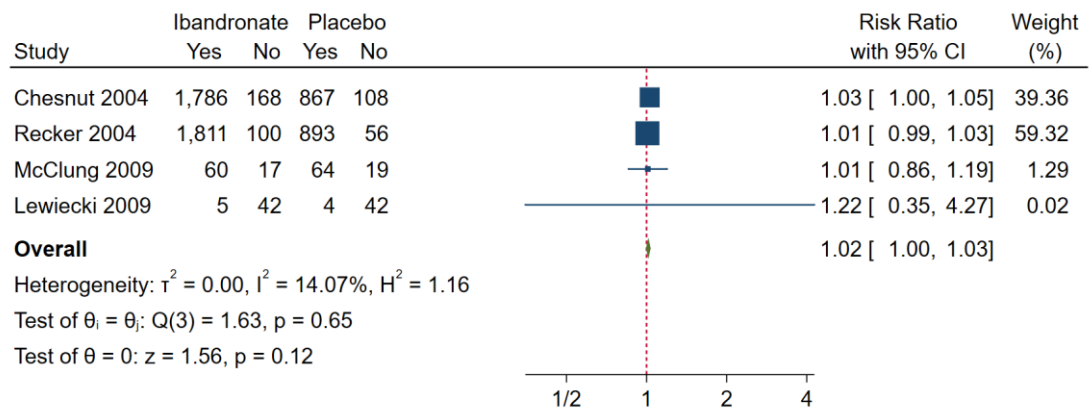

Random-effects REML model

**eFigure 46. Lasofoxifene Compared with Placebo on All Adverse Event.**

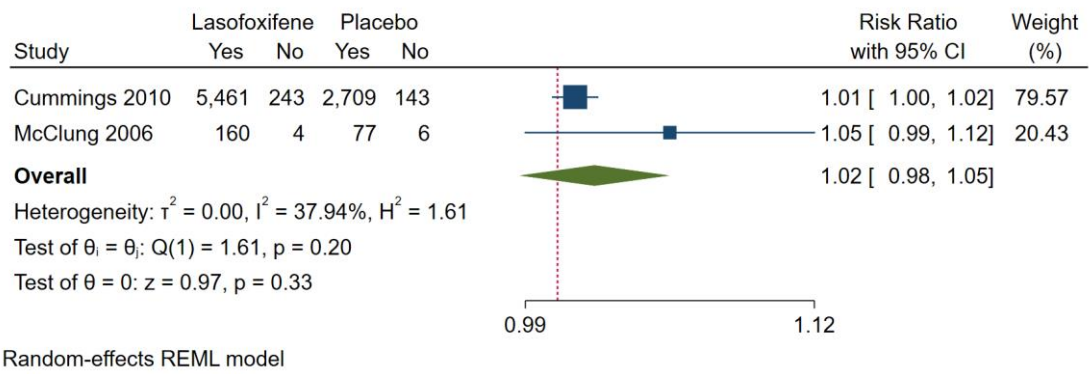

**eFigure 47. PTH Compared with Placebo on All Adverse Event.**

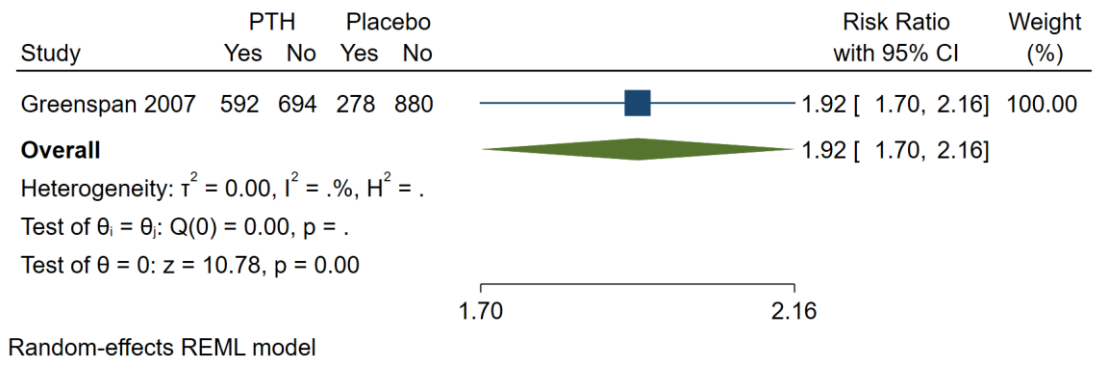

**eFigure 48. Raloxifene Compared with Placebo on All Adverse Event.**

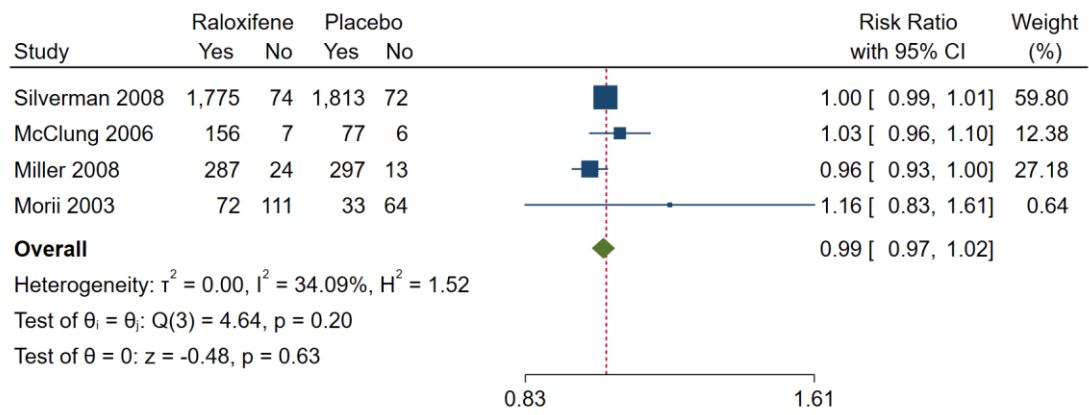

Random-effects REML model

**eFigure 49. Risedronate Compared with Placebo on All Adverse Event.**

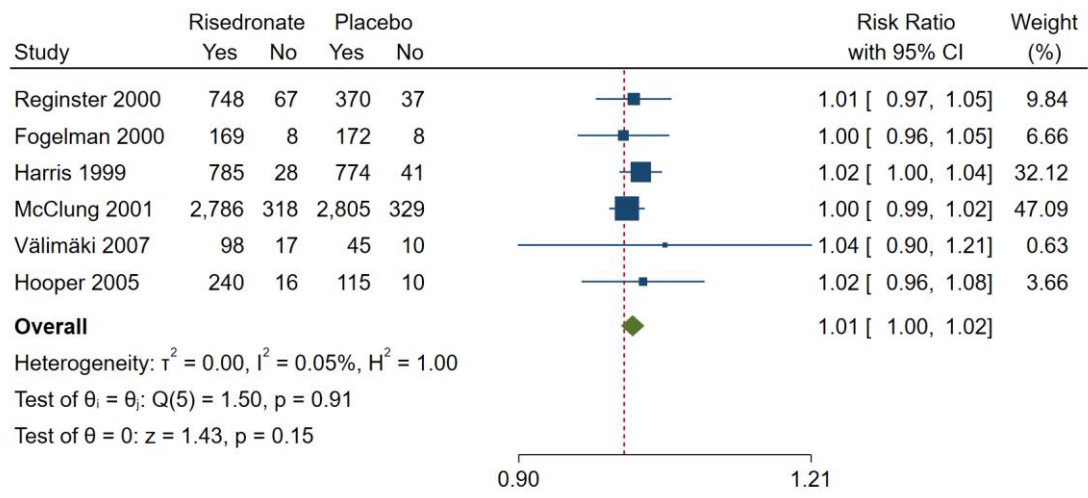

Random-effects REML model

**eFigure 50. Romosozumab Compared with Placebo on All Adverse Event.**

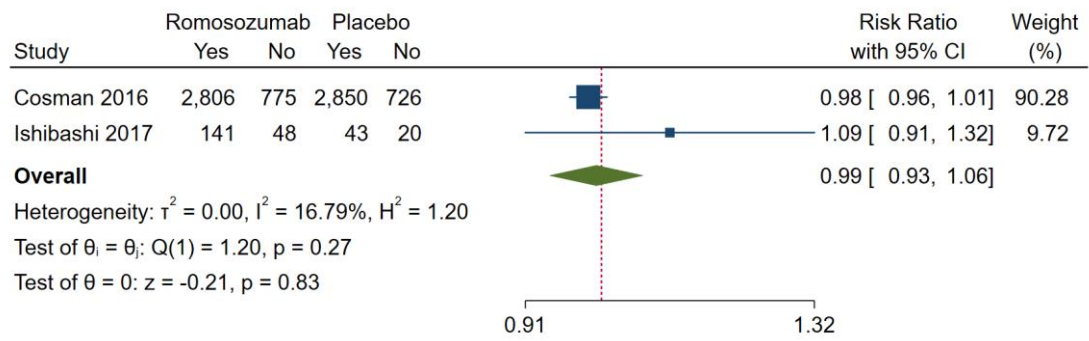

Random-effects REML model



**eFigure 51. Strontium Ranelate Compared with Placebo on All Adverse Event.**

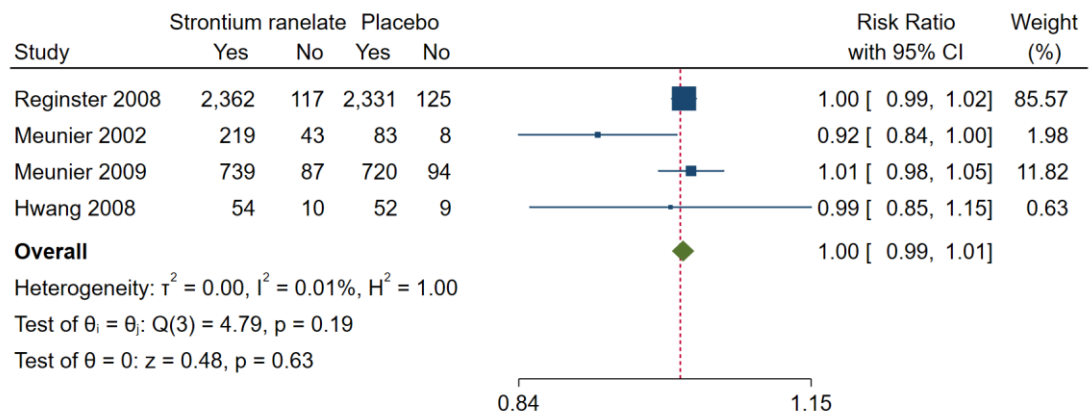

Random-effects REML model

**eFigure 52. Teriparatide Compared with Placebo on All Adverse Event.**

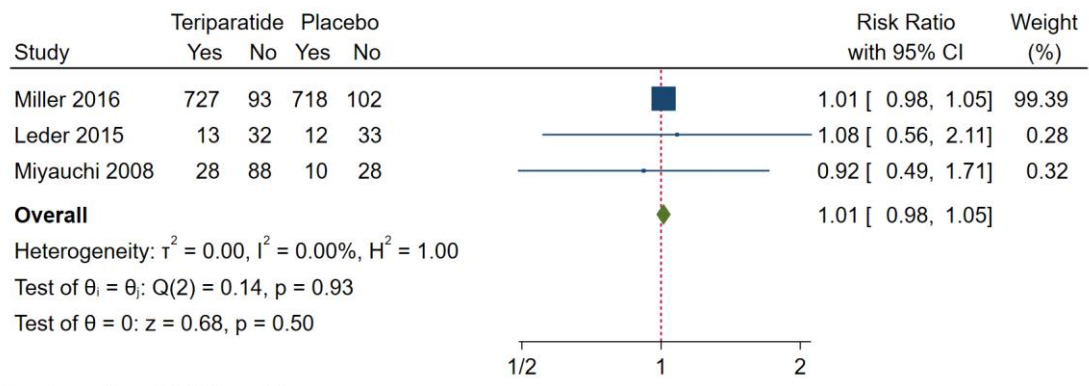

Random-effects REML model

**eFigure 53. Zoledronate Compared with Placebo on All Adverse Event.**

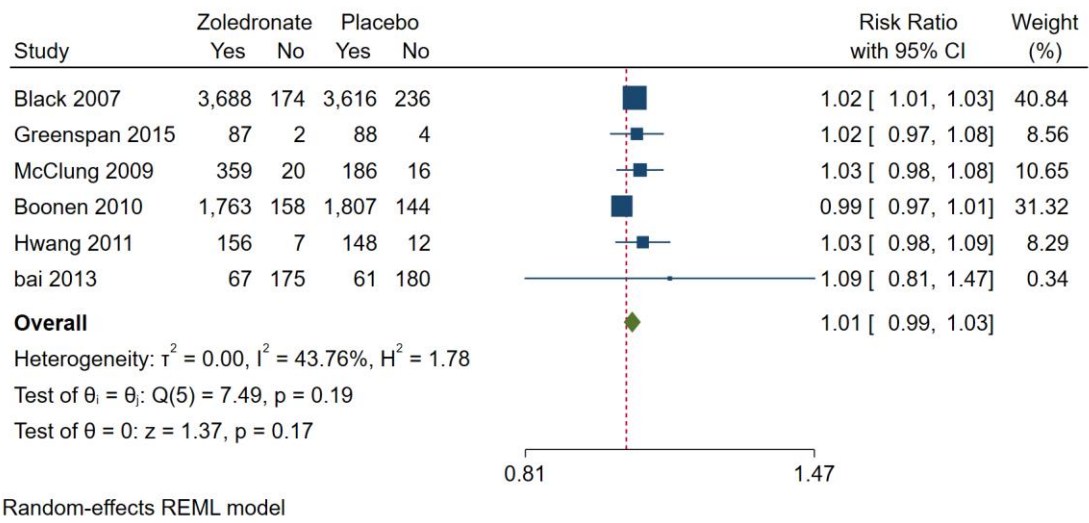

**eFigure 54. Forest Plots depicting the direct and indirect results of head-to-head comparisons.**

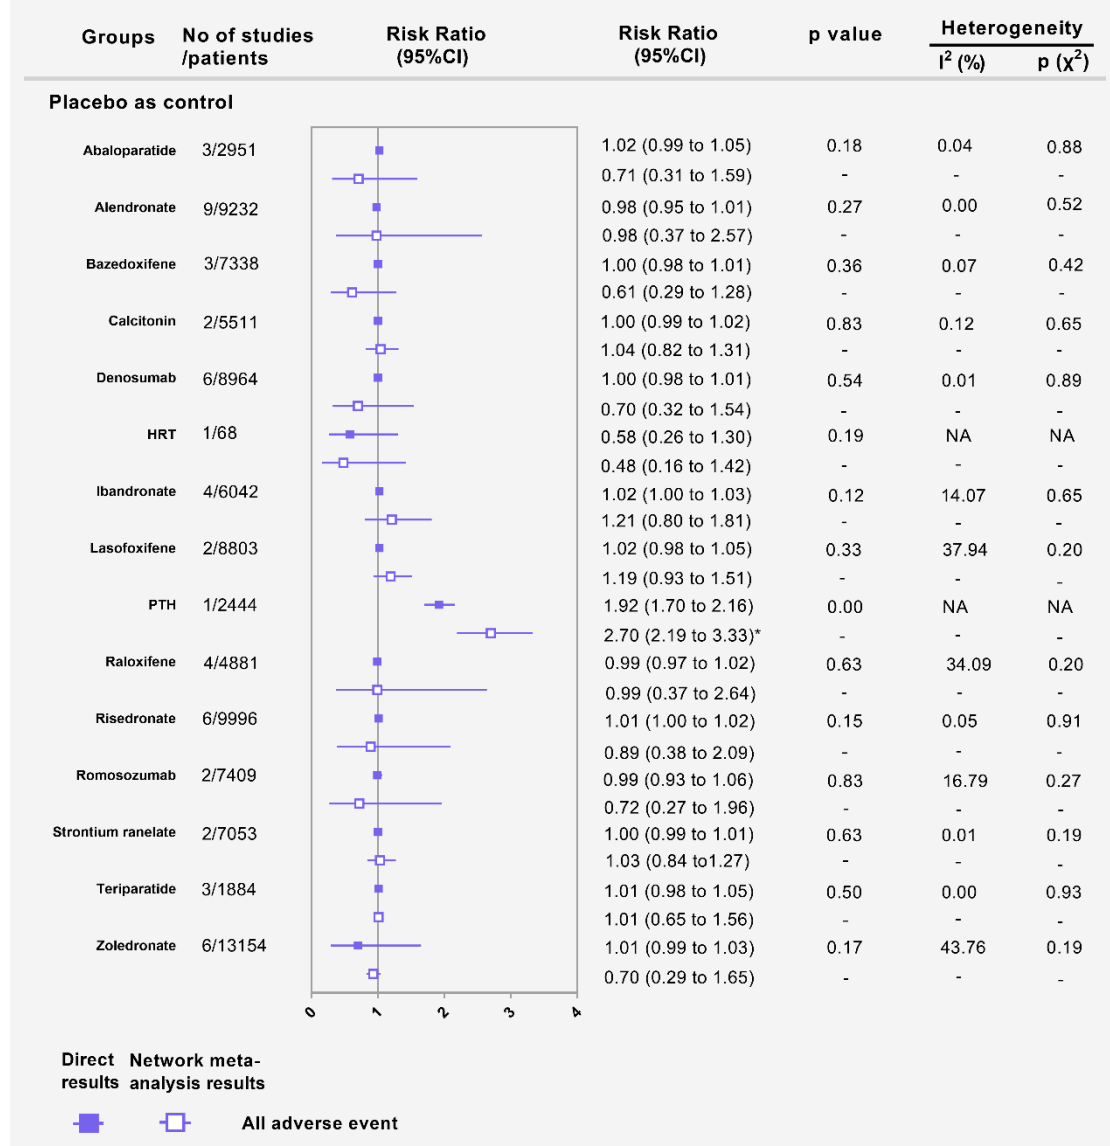

\*Values in brackets are 95% CI.

**eFigure 55.** Sensitivity analyses based on the frequency of administration (5 mg zoledronate once a year: vertebral fractures).

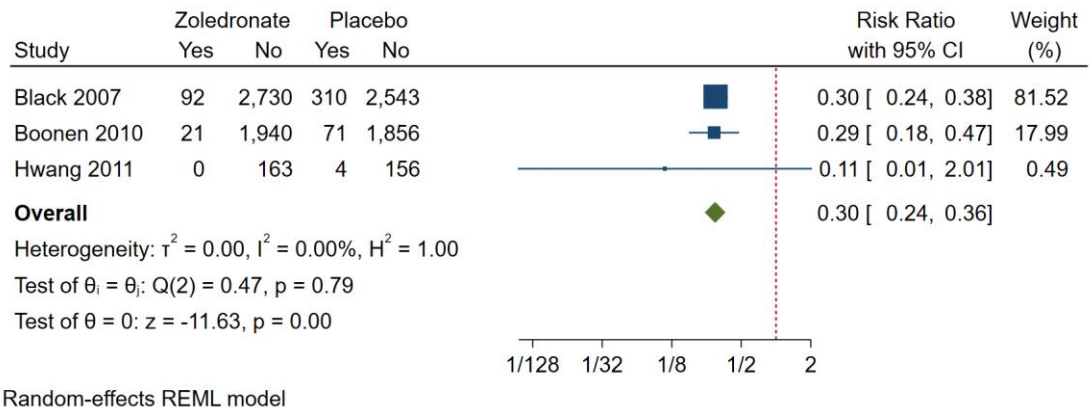

**eFigure 56.** Sensitivity analyses based on the frequency of administration (other frequency of 5 mg zoledronate: vertebral fractures).

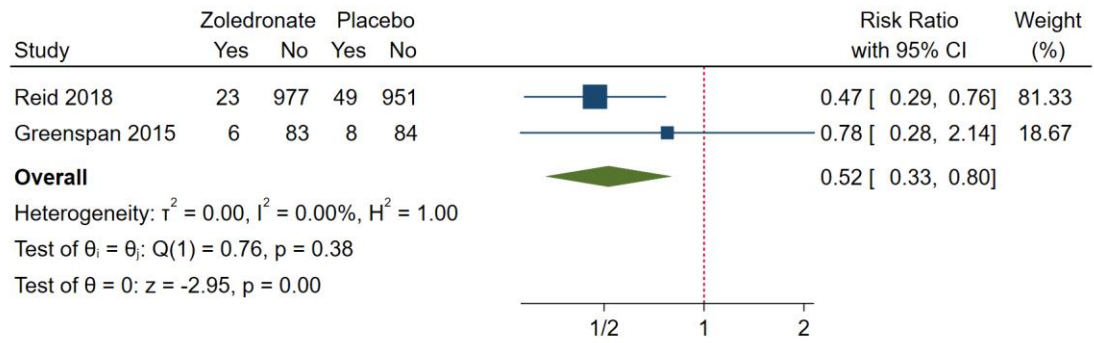

Random-effects REML model

**eFigure 57.** Sensitivity analyses based on the frequency of administration (5 mg zoledronate once a year: serious adverse event).

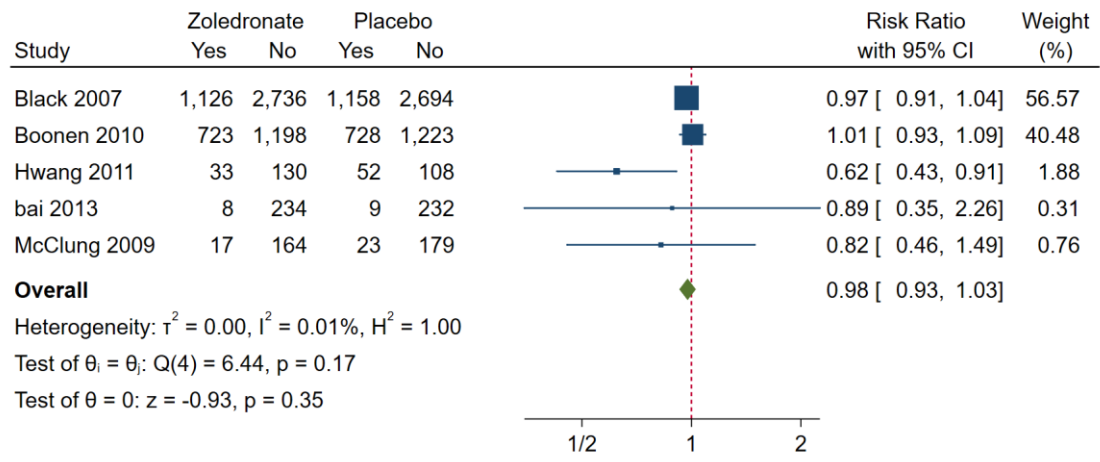

Random-effects REML model

**eFigure 58.** Sensitivity analyses based on the frequency of administration (other frequency of 5 mg zoledronate: serious adverse event).

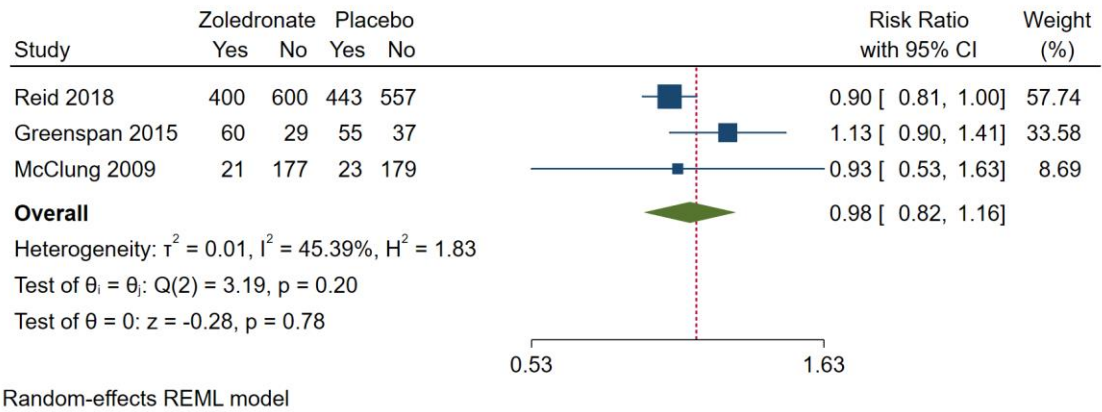



**eFigure 59.** Sensitivity analyses based on the frequency of administration (5 mg zoledronate once a year: all adverse event).

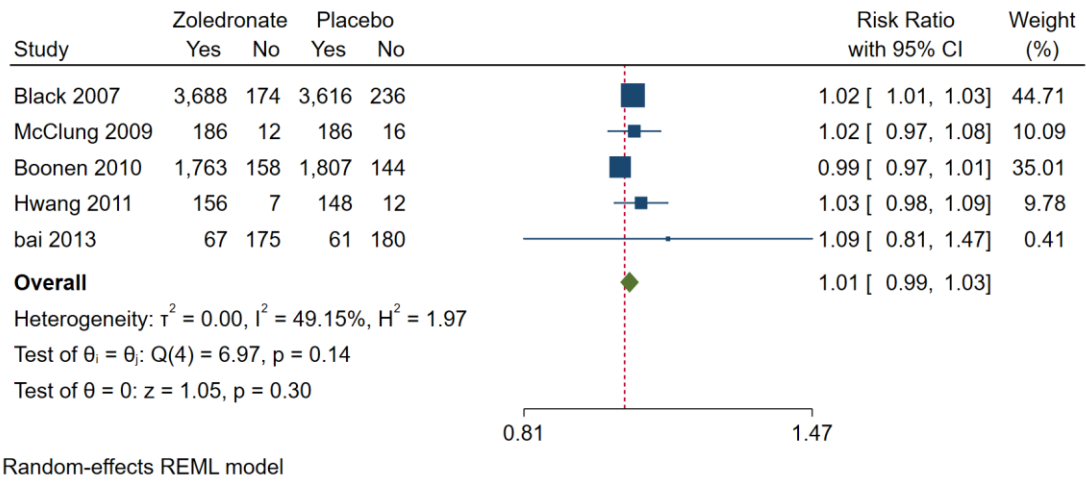

**eFigure 60.** Sensitivity analyses based on the frequency of administration (other frequency of 5 mg zoledronate: all adverse event).

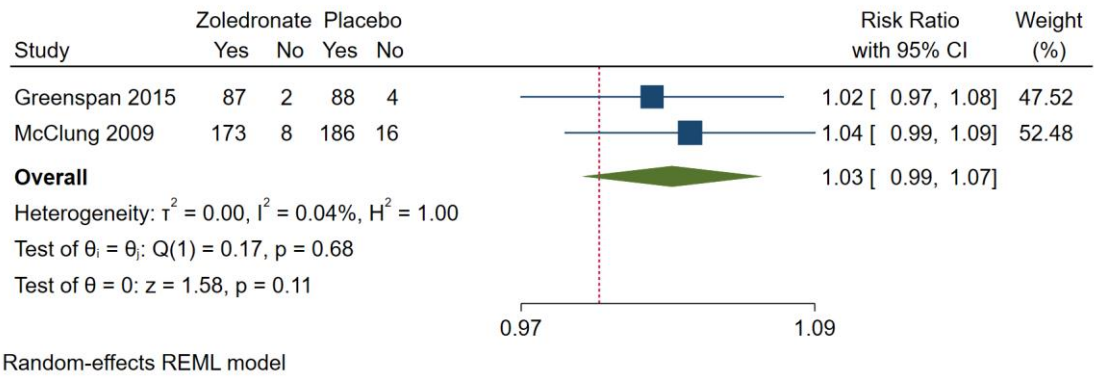

Supplement: mmc1.pdf [file mmc1.pdf]
