# Supplementary material for: Efficacy and safety of pharmacologic therapies for prevention of osteoporotic vertebral fractures in postmenopausal women
Source: PubMed Central journal article supplement — Heliyon. 2022 Nov 29;9(2):e11880. doi: 10.1016/j.heliyon.2022.e11880 (PMC9958453; doi:10.1016/j.heliyon.2022.e11880), 2022-11-29
Supplement: mmc2.pdf [file mmc2.pdf]

## Membership Certificate

This is to certify that the Governing Board has admitted

**Tian Li**

To membership of The Cochrane Collaboration.

The membership started on 2020-05-15 and is due for renewal on 2023-05-15.

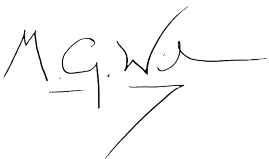

**Mark Wilson**  
Chief Executive Officer

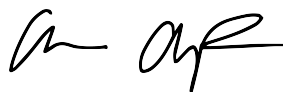

**Chris Champion**  
Head of People Services

**Trusted evidence.**  
**Informed decisions.**  
**Better health.**
